# Supplementary material for: Mendelian randomization and nomogram-based prediction of hepatocellular carcinoma risk in patients with hepatitis B cirrhosis
Source: PeerJ. 2025 Oct 20;13:e20179. doi: 10.7717/peerj.20179 (PMC12548634; doi:10.7717/peerj.20179)
Supplement: Supplemental Information 1 [file peerj-13-20179-s001.xlsx]

## Sheet: Sheet 1
ID	LDL	Hepatocellular_carcinoma	Antiviral_treatment	Sex	Age	Abnormal_prothrombin	BMI	Hepatitis_B_virus_DNA_detection	AFP	Albumin	AST	ALT	PT	Diabetes	Hypertension	combined_factor
1	2.35	Yes	No	Male	75	33.4	24.8	0	1.4	46.7	49	49	13.7	1	1	-0.162695
2	1.08	Yes	No	Male	43	305.2	25.7	0	1.1	21.1	33	15	20.6	0	0	-0.685388
3	3.04	Yes	No	Male	62	245.5	21.1	0	1.8	41.5	53	31	12.5	0	0	-0.334142
4	2.62	Yes	Yes	Male	67	6460	20.7	0	92.6	34.4	47	42	11.8	0	1	-0.252103
5	2.35	Yes	No	Male	63	23.2	17.59	0	2.8	41	36	22	13.2	0	0	-0.580126
6	1.09	Yes	No	Male	67	22.16	27.1	0	15.5	42.6	60	36	15.2	0	0	-0.216972
7	2.29	Yes	Yes	Male	64	211.9	21.4	0	14.8	32.4	19	10	13.7	0	0	-0.859437
8	1.56	Yes	Yes	Female	59	201	16.14	0	133.1	31.4	51	29	12.5	1	0	-0.36334
9	2.35	Yes	No	Female	68	66.87	22.03	0	3.5	28.2	19	8	14.9	0	0	-0.883143
10	2.2	Yes	No	Male	84	404.72	15.61	0	48.1	37.4	31	18	12.8	0	1	-0.664307
11	2.35	Yes	No	Male	56	64.73	28.91	1	244.6	37.2	67	89	13.4	0	0	0.464676
12	1.51	Yes	Yes	Male	58	749.4	22.41	0	2.9	35.2	52	35	17.1	0	0	-0.296885
13	2.35	Yes	No	Male	67	36.2	18.3	0	59.4	43.6	25	15	13.2	0	1	-0.748239
14	3.51	Yes	Yes	Male	51	18.25	18.91	0	1	28	39	16	13.8	0	0	-0.623366
15	3.18	Yes	Yes	Male	66	453.4	21.2	0	125.8	42.7	24	13	13.2	0	0	-0.77418
16	2.35	Yes	No	Male	36	31.83	25.25	0	1.8	37.1	27	17	13.8	0	0	-0.713158
17	1.59	Yes	No	Male	53	27	21.51	0	17898.4	44.6	32	22	13.3	0	0	0.814749
18	2.85	Yes	Yes	Male	68	66.55	23	0	3.4	30.2	68	34	14.9	0	0	-0.173237
19	2.43	Yes	Yes	Male	73	50.86	25.9	0	11.7	42.5	29	21	12.7	0	0	-0.649884
20	3.08	Yes	No	Male	69	822.62	20	0	20.6	40.6	47	26	12.8	0	0	-0.440278
21	2.35	Yes	Yes	Female	50	2180.9	26.67	0	13.5	37.4	26	20	13	0	1	-0.686457
22	3.06	Yes	No	Male	63	27.89	25.3	0	5038.1	40.7	26	8	13.4	0	0	-0.422158
23	1.79	Yes	Yes	Male	50	997.63	18.04	0	3.6	39.5	82	70	12.7	0	0	0.355376
24	3.2	Yes	Yes	Male	56	49.07	27.68	1	27.2	41.8	101	92	14.2	0	0	0.768423
25	2.35	Yes	No	Male	62	2969.3	22.8	0	116.6	29.7	29	20	12.5	1	0	-0.652912
26	2.51	Yes	No	Male	69	2000.4	23.67	0	7.3	38.7	48	23	13	0	1	-0.467107
27	3.76	Yes	Yes	Female	76	27.88	22.2	0	3	41.5	24	18	13.5	1	1	-0.726975
28	2.06	Yes	Yes	Male	67	224.27	18.34	0	2.3	38.9	84	59	12.3	0	0	0.246729
29	2.24	Yes	No	Male	54	237.88	18.17	0	34.5	41.4	31	19	14.1	0	0	-0.653991
30	2.35	Yes	Yes	Male	55	77.93	21.15	0	610.2	34.2	54	25	14.7	0	0	-0.345545
31	2.35	Yes	Yes	Male	75	156.35	18.6	0	2.7	40.8	23	18	13.5	0	0	-0.735437
32	2.35	Yes	Yes	Male	50	429.35	20.04	0	7.1	45.5	48	35	13.1	0	1	-0.330302
33	2.06	Yes	Yes	Male	58	20505.2	19.7	0	290.1	33.6	143	55	16.5	0	1	0.721949
34	1.35	Yes	Yes	Male	75	429.68	18.5	0	1.7	38	44	28	13.8	0	0	-0.444298
35	1.69	Yes	Yes	Male	69	380.19	20.5	0	25.7	30.4	48	44	14.5	0	1	-0.226202
36	2.26	Yes	Yes	Male	55	81581.1	23.18	0	14396.7	42.2	83	26	13.2	0	0	1.01116
37	2.07	Yes	Yes	Male	62	89.67	25.6	0	4	40.1	53	52	13.3	0	0	-0.0945297
38	2.58	Yes	No	Male	60	43.88	17.6	0	130.3	38.7	20	17	13.7	0	0	-0.761967
39	2.01	Yes	Yes	Male	50	2308.8	21.45	0	1.2	42	33	28	15.3	0	0	-0.537158
40	2.35	Yes	No	Male	58	23099.8	22.02	0	1832.1	33.9	138	43	12.4	0	0	0.666037
41	2.35	Yes	No	Male	50	82700.6	19.33	0	28.7	43.7	66	25	14.5	0	0	-0.290709
42	1.95	Yes	No	Male	32	3726.43	23.8	0	99.2	42.9	42	51	12.5	0	0	-0.191151
43	2.32	Yes	No	Male	61	4138.83	25.35	0	431	30.1	41	18	14	0	0	-0.549358
44	1.87	Yes	No	Male	51	391.64	24.46	0	127.7	28	279	140	15.7	0	0	2.82572
45	2.1	Yes	Yes	Male	69	341.7	21.7	0	1465.2	35.6	56	20	14.9	0	0	-0.317421
46	3.67	Yes	No	Male	90	234.49	17.34	0	1.4	39.4	75	68	14.4	0	1	0.27333
47	2.35	Yes	Yes	Male	60	823.36	20.75	0	444.2	38.3	29	26	13	0	1	-0.558349
48	2.87	Yes	No	Male	41	78.66	18.94	0	192.1	40.3	28	22	11.9	0	0	-0.632519
49	2.35	Yes	No	Male	58	111.14	25.61	0	4.3	34.9	21	13	13.9	0	1	-0.809194
50	1.41	Yes	No	Male	48	662.18	22.11	0	2382.7	40.3	27	24	14.7	0	0	-0.443276
51	3.37	Yes	Yes	Male	64	892.63	19.8	0	26.6	36.3	23	16	14	1	1	-0.756332
52	2.35	Yes	No	Female	67	25531.6	21.29	1	20000	28.6	504	114	18.6	0	0	6.01429
53	2.35	Yes	No	Male	62	100.2	21.8	0	2.8	42	22	20	13.1	0	0	-0.721064
54	2.35	Yes	No	Male	53	879	20.07	0	4	39.2	49	20	13.2	0	0	-0.493138
55	1.82	Yes	Yes	Male	60	94.64	19.6	0	12.4	35.7	26	9	13.7	0	0	-0.811964
56	2.5	Yes	No	Male	60	88358.5	18.4	0	8426	32.3	56	17	13.6	0	0	0.204063
57	2.83	Yes	Yes	Male	62	3540.8	22.59	0	1734	39.3	44	25	14.1	0	1	-0.340212
58	2.34	Yes	No	Female	64	135.28	21.45	0	91.3	41.2	45	30	12.9	0	0	-0.405904
59	1.86	Yes	No	Male	50	2835.05	28.6	0	2.8	29.4	200	60	14.9	0	0	1.237
60	2.21	Yes	No	Male	46	2024.57	26.9	0	13.5	29.1	374	600	16.3	0	0	8.86302
61	2.99	Yes	No	Male	51	722.66	22.86	0	98.1	31.5	35	34	13.3	0	0	-0.444135
62	2.94	Yes	Yes	Male	61	9248.3	19	0	50.2	31.4	34	18	13.9	0	0	-0.638825
63	2.35	Yes	No	Male	72	52.87	23.8	0	27	41.4	35	40	13.4	0	1	-0.381401
64	2.35	Yes	Yes	Male	41	46.3	22.1	0	9618.3	36.5	138	91	13.3	0	0	1.8349
65	2.09	Yes	Yes	Male	57	4140.79	22.8	0	2489.1	41.6	89	72	13.3	1	1	0.635667
66	2.35	Yes	No	Male	72	771.22	18.6	1	8.5	35.5	127	126	17.5	0	0	1.37398
67	1.83	Yes	Yes	Male	56	16434.5	22.9	0	1328.3	33.1	84	61	15.1	0	1	0.375389
68	3.41	Yes	Yes	Male	34	398.87	18.38	0	3.9	41	140	125	13.7	0	0	1.47191
69	2.35	Yes	Yes	Male	64	47.67	19.3	0	272.2	40.9	25	21	13.6	0	1	-0.662841
70	1.43	Yes	No	Male	61	89.68	20.28	0	92.3	36.9	106	95	13.1	0	0	0.850016
71	1.77	Yes	No	Male	56	222.5	20.5	1	145	33.3	750	253	13.2	0	0	8.08987
72	2.35	Yes	No	Female	47	7071.3	26.5	1	20000	37.3	56	26	14.8	1	0	1.23065
73	3.14	Yes	Yes	Male	61	41.13	22.91	0	2	44.3	31	31	12.4	0	0	-0.519765
74	2.12	Yes	Yes	Male	62	25.08	23	0	2.1	38.2	25	24	13.8	1	1	-0.650198
75	3.36	Yes	Yes	Male	38	40.88	29	0	4.6	49.1	36	42	12.5	0	0	-0.351948
76	1.33	Yes	No	Male	76	30.65	21.61	0	13	31.9	39	25	13.8	1	1	-0.519792
77	2.35	Yes	Yes	Male	66	44.16	24.2	0	19.1	30	55	40	14.5	0	0	-0.213269
78	2.35	Yes	Yes	Female	80	63.11	18.1	0	5287.3	25.4	130	94	15.2	0	1	1.45585
79	2.2	Yes	No	Male	74	41.57	24.2	0	1.3	37.6	79	78	13.5	0	1	0.421092
80	2.36	Yes	No	Male	60	52783.9	21.3	0	5596.7	36.2	133	101	13.8	0	0	1.58568
81	3.33	Yes	Yes	Male	54	959.6	26.73	0	2.7	47.7	46	42	13.4	0	1	-0.267718
82	3.55	Yes	No	Male	55	19764.9	20.1	1	264.3	35.3	100	88	13.8	0	0	0.733306
83	1.4	Yes	Yes	Male	55	34.65	26.5	0	1.5	44.1	21	25	16.2	0	0	-0.672597
84	2.59	Yes	No	Male	62	199.04	21	0	16.9	31.7	18	20	13.7	1	1	-0.753691
85	2.19	Yes	No	Male	47	48.12	20.62	0	32.9	43.3	92	144	11.8	0	0	1.28582
86	3.07	Yes	No	Male	62	80.71	18.83	0	172	41.5	49	40	14.1	0	0	-0.251691
87	2.35	Yes	No	Male	57	130243	20.72	0	20000	27.2	175	85	13.5	0	0	2.90749
88	1.52	Yes	No	Male	65	10780.4	21.5	0	7.9	34.2	163	132	13.8	0	1	1.74612
89	2.35	Yes	No	Male	68	9363.78	16.96	0	149.2	32.2	152	30	14.5	0	0	0.501601
90	3.02	Yes	No	Male	66	29.37	24	0	48.3	26.2	62	50	12	1	1	-0.0378533
91	2.35	Yes	Yes	Male	60	21.96	27.7	0	2.6	39.8	21	16	13.1	0	0	-0.775125
92	1.1	Yes	No	Male	41	2486.49	22.1	1	146.5	27.2	82	95	14.8	0	0	0.651827
93	2.35	Yes	No	Male	61	771.63	16.46	0	9	38.6	55	33	14.1	0	0	-0.293887
94	2.75	Yes	No	Male	56	192.92	31.25	0	15.7	30.8	47	23	13.4	0	0	-0.474875
95	2.71	Yes	Yes	Male	74	115.37	24.9	0	1.7	27	19	5	12.7	0	0	-0.917492
96	2.86	Yes	No	Female	42	3597.55	19.95	0	4983.7	31.4	32	27	14.5	0	0	-0.159239
97	2.14	Yes	No	Male	68	25.07	24.61	0	1.3	38	28	22	13.2	0	1	-0.647751
98	2.68	Yes	No	Female	47	12843.4	23.31	0	5681	31.4	102	40	13.3	0	1	0.635321
99	1.72	Yes	Yes	Male	73	330.86	23.71	0	2934.5	30	61	31	14.7	0	0	-0.0325155
100	1.43	Yes	No	Male	53	21308	20.69	1	11933.6	36.3	88	53	14.1	0	0	1.16456
101	1.7	Yes	No	Male	73	177.27	20.66	0	3.9	30.3	88	34	14.1	0	1	-0.00443364
102	2.79	Yes	No	Female	58	259.83	20.1	0	13.6	32.5	39	25	14.5	0	0	-0.519744
103	1.29	No	Yes	Male	48		22.72	0	1.2	41.2	25	14	14.4	0	0	-0.764287
104	2.11	No	Yes	Male	47		25.62	0	0.9	28.8	25	29	16.2	1	0	-0.593285
105	2.26	No	Yes	Male	54		30.8	0	2.6	31.4	48	38	13.3	0	0	-0.296456
106	2.92	No	Yes	Female	62		32.05	0	1.5	36.4	69	42	14.1	0	0	-0.0737362
107	2.26	No	No	Female	59		21.4	0	242.2	33.2	39	19	15.1	0	0	-0.569905
108	2.25	No	Yes	Male	49		28.37	0	4.5	25.7	43	25	18.4	0	0	-0.486718
109	0.82	No	No	Male	56		26.99	0	2.7	28.7	78	61	16.9	0	0	0.218936
110	1.18	No	Yes	Male	63	214.47	21	0	1.4	37.3	42	22	18	0	0	-0.529609
111	1.49	No	Yes	Male	67		21.26	0	0.3	29	30	17	16.1	0	0	-0.687963
112	0.64	No	Yes	Male	44		22.99	0	1.4	31.1	22	12	20.4	0	0	-0.812389
113	3.17	No	Yes	Female	48		24.03	0	4.3	32.4	22	12	14.1	0	0	-0.812158
114	2.1	No	No	Male	73	84.05	20.48	0	7.8	25.6	74	39	15.8	0	0	-0.0652477
115	1.85	No	Yes	Female	54		22.04	0	2.4	32.8	40	31	16	0	0	-0.44379
116	0.83	No	No	Male	39		21.55	0	0.7	22.7	33	24	17.7	0	0	-0.582805
117	1.53	No	Yes	Male	54		30.4	0	1.3	33.2	35	22	16.1	0	0	-0.588684
118	0.93	No	No	Male	58		27.34	0	4.3	33.2	57	41	16	0	0	-0.186172
119	2.29	No	Yes	Male	34		20.2	1	4.8	40.3	36	37	15.1	0	0	-0.40894
120	1.82	No	No	Male	44		23.03	0	3.2	29.3	32	16	18.5	0	0	-0.682257
121	2.13	No	Yes	Male	67		20	0	2.1	28.3	33	16	17.3	0	0	-0.673907
122	1.7	No	Yes	Female	77		23.5	0	24.1	37.9	34	15	14.8	1	1	-0.675114
123	0.75	No	No	Male	71		26.4	0	4.8	27.6	34	18	17.7	0	1	-0.64245
124	1.22	No	No	Male	51		16.3	1	28.5	36.4	39	34	15.4	0	0	-0.415939
125	1.43	No	Yes	Female	75		26.58	0	1.3	33.4	34	28	16.4	0	0	-0.528712
126	2.14	No	Yes	Female	47		20.43	0	2.5	30.1	36	21	14.2	1	0	-0.591552
127	3.1	No	Yes	Male	68		22.31	0	1.5	26.1	22	6	17.2	0	0	-0.880792
128	3.6	No	Yes	Male	46		21.26	0	2.9	28.6	56	46	16.9	0	0	-0.137713
129	2.47	No	Yes	Male	62		25	0	12.6	37.4	34	24	15.3	0	0	-0.573417
130	3.4	No	Yes	Female	69		24.9	0	1.6	41.4	48	31	13.5	0	1	-0.376348
131	1.5	No	Yes	Male	38		28.3	0	2.3	44.8	77	97	16.7	0	0	0.620928
132	1.39	No	Yes	Male	39		24.4	1	5.2	38.6	66	55	15.6	0	0	0.0494672
133	1.68	No	Yes	Male	47		21.26	0	1.8	29.5	104	114	15.5	0	0	1.04255
134	3.9	No	No	Male	81		26.56	1	8.5	29.1	33	14	17	0	1	-0.696199
135	1.91	No	Yes	Male	68		20.76	0	1.8	34.6	24	17	14.1	0	0	-0.738472
136	2.69	No	Yes	Female	69		24.56	0	4	28.3	38	16	14.8	0	1	-0.631564
137	3.1	No	No	Male	52		27.3	0	0.4	25.5	15	17	17	0	0	-0.814527
138	2.49	No	Yes	Male	35		29.4	0	3.5	40.2	26	33	13.7	0	0	-0.539033
139	3.21	No	No	Female	31		21.6	0	3.9	40.2	25	12	12.6	0	0	-0.786875
140	2.75	No	No	Female	59		19.46	0	3.7	37.7	28	18	13.4	0	0	-0.693166
141	1.26	No	Yes	Male	75		21.88	0	1.3	32	20	11	15.1	1	1	-0.840675
142	3.41	No	Yes	Male	52		19.72	0	1.5	28.8	33	23	14	0	0	-0.594143
143	1.48	No	Yes	Male	45	18	25.64	0	3.4	29.3	85	36	18	0	0	-0.00698454
144	2.01	No	Yes	Male	60	17.04	21.26	0	3.2	41.6	28	39	14.2	0	1	-0.45377
145	1.02	No	Yes	Male	56	268.32	32.05	0	3.7	31.1	67	36	20.4	0	0	-0.158847
146	1.37	No	Yes	Male	38		32.2	0	2.6	32.7	51	55	18.4	0	0	-0.0773126
147	2.9	No	Yes	Female	52		20.45	1	6.2	41.6	57	38	15.2	0	0	-0.220226
