# Supplementary material for: Mendelian randomization and nomogram-based prediction of hepatocellular carcinoma risk in patients with hepatitis B cirrhosis
Source: PeerJ. 2025 Oct 20;13:e20179. doi: 10.7717/peerj.20179 (PMC12548634; doi:10.7717/peerj.20179)
Supplement: Supplemental Information 2 [file peerj-13-20179-s002.xlsx]

## Sheet: S1
Tab S1. Characteristics of GWAS-identified CRP-associated genetic instruments.
	SNP	effect_allele.exposure	other_allele.exposure	beta.exposure	se.exposure	exposure	mr_keep.exposure	pval.exposure	pval_origin.exposure	id.exposure	eaf.exposure	data_source.exposure	chromosome	base_pair_location	effect_allele	other_allele	N	effect_allele_frequency	T	SE_T	P_noSPA	beta	standard_error	p_value	CONVERGE	R	F
1	rs10027275	C	G	-0.0138	0.0023	exposure	TRUE	1.9731752900754e-09	inferred	TQxy2V	NA	textfile	4	148981496	G	C	447158	0.256599	-4.6682	6.77139	0.490571	-0.101811	0.14768	0.490571	1	-0.00897231	36
2	rs10095930	T	C	0.0286	0.002	exposure	TRUE	2.18809557403781e-46	inferred	TQxy2V	NA	textfile	8	116974302	C	T	445755	0.4155	-5.07102	7.63873	0.506782	-0.0869067	0.130912	0.506782	1	0.0214135812797234	204.49
3	rs10106298	A	G	0.0151	0.0021	exposure	TRUE	6.45657362912717e-13	inferred	TQxy2V	NA	textfile	8	103688381	A	G	448175	0.371088	-0.0264225	7.50146	0.99719	-0.000469552	0.133307	0.99719	1	0.0107401354497197	51.702947845805
4	rs1037170	T	C	0.0281	0.0023	exposure	TRUE	2.51010697461179e-34	inferred	TQxy2V	NA	textfile	17	72702914	C	T	450172	0.275084	-6.68153	6.95736	0.336877	-0.138034	0.143733	0.336877	1	0.0182061543640484	149.264650283554
5	rs10420434	A	G	0.0598	0.005	exposure	TRUE	5.75619210271967e-33	inferred	TQxy2V	NA	textfile	19	45451190	A	G	455878	0.0467186	0.31974	3.32612	0.923417	0.0289015	0.30065	0.923417	1	0.0177108616647086	143.042
6	rs10497423	T	G	-0.0134	0.002	exposure	TRUE	2.08419539759304e-11	inferred	TQxy2V	NA	textfile	2	174847693	G	T	441364	0.407616	4.50557	7.56394	0.551399	0.0787506	0.132206	0.551399	1	-0.0100845	44.89
7	rs10498240	A	C	0.0133	0.0021	exposure	TRUE	2.39920452311641e-10	inferred	TQxy2V	NA	textfile	2	230734531	A	C	453434	0.316718	9.25086	7.27162	0.203307	0.174952	0.137521	0.203307	1	0.0094049622098797	40.1111111111111
8	rs1056441	T	C	-0.0208	0.0021	exposure	TRUE	3.96914331503724e-23	inferred	TQxy2V	NA	textfile	20	62370349	T	C	454013	0.324896	3.749	7.34224	0.609626	0.0695438	0.136198	0.609626	1	-0.0146982	98.1043083900227
9	rs10760691	A	G	-0.0172	0.0021	exposure	TRUE	2.60194642368162e-16	inferred	TQxy2V	NA	textfile	9	102281383	G	A	412245	0.376156	-6.79455	7.19726	0.345146	-0.131167	0.138942	0.345146	1	-0.0127555	67.0839002267574
10	rs10797119	T	C	-0.0177	0.002	exposure	TRUE	8.75192959861808e-19	inferred	TQxy2V	NA	textfile	9	92202495	T	C	447069	0.464135	4.6281	7.74162	0.54996	0.0772215	0.129172	0.54996	1	-0.0132348	78.3225
11	rs10831676	A	C	0.0118	0.002	exposure	TRUE	3.63501572619888e-09	inferred	TQxy2V	NA	textfile	11	11820449	C	A	452665	0.462371	-4.37139	7.78684	0.574538	-0.0720936	0.128422	0.574538	1	0.00876895446454999	34.81
12	rs10864088	A	G	-0.016	0.0021	exposure	TRUE	2.55554182587089e-14	inferred	TQxy2V	NA	textfile	1	214392881	G	A	454772	0.297573	-0.404914	7.1458	0.954812	-0.00792977	0.139942	0.954812	1	-0.0112974	58.0498866213152
13	rs10868852	A	C	0.0344	0.006	exposure	TRUE	9.8475829467645e-09	inferred	TQxy2V	NA	textfile	9	71069835	A	C	455918	0.0291226	0.882521	2.62738	0.736951	0.127844	0.380607	0.736951	1	0.00849080994288897	32.8711111111111
14	rs10871777	A	G	-0.0196	0.0023	exposure	TRUE	1.57175094363397e-17	inferred	TQxy2V	NA	textfile	18	57851763	G	A	456348	0.23607	-12.6603	6.63583	0.0564085	-0.28751	0.150697	0.0564085	1	-0.0126138	72.6200378071834
15	rs10924372	T	C	-0.0147	0.0021	exposure	TRUE	2.55962508777167e-12	inferred	TQxy2V	NA	textfile	1	236312326	C	T	441716	0.369373	-4.67281	7.43252	0.529546	-0.0845876	0.134544	0.529546	1	-0.0105318	49
16	rs10969334	A	C	-0.0112	0.002	exposure	TRUE	2.14351805166219e-08	inferred	TQxy2V	NA	textfile	9	29717279	A	C	453520	0.393319	6.22351	7.64679	0.415718	0.106433	0.130774	0.415718	1	-0.00831526	31.36
17	rs11047224	C	G	-0.0522	0.0054	exposure	TRUE	4.17763639645808e-22	inferred	TQxy2V	NA	textfile	12	24195042	C	G	455651	0.0348447	-1.30297	2.82963	0.645178	-0.162732	0.353403	0.645178	1	-0.0143191	93.4444444444444
18	rs11054402	T	C	-0.012	0.002	exposure	TRUE	1.9731752900754e-09	inferred	TQxy2V	NA	textfile	12	11791029	T	C	451419	0.410161	3.1276	7.67113	0.683486	0.0531486	0.130359	0.683486	1	-0.00892987	36
19	rs11078597	T	C	0.0187	0.0026	exposure	TRUE	6.37052615053521e-13	inferred	TQxy2V	NA	textfile	17	1618363	C	T	456348	0.186394	5.96818	6.1179	0.329298	0.159455	0.163455	0.329298	1	0.0106462465878218	51.7292899408284
20	rs11118625	A	G	0.0194	0.0022	exposure	TRUE	1.16333244185187e-18	inferred	TQxy2V	NA	textfile	1	221103388	G	A	443726	0.267614	-3.60542	6.86643	0.599528	-0.0764705	0.145636	0.599528	1	0.0132368466895769	77.7603305785124
21	rs11159021	T	C	-0.0118	0.0021	exposure	TRUE	1.92012934444188e-08	inferred	TQxy2V	NA	textfile	14	73974531	C	T	453494	0.342199	3.60418	7.42381	0.627329	0.0653963	0.134702	0.627329	1	-0.00834378	31.5736961451247
22	rs11217192	T	G	0.0134	0.0023	exposure	TRUE	5.67420586461324e-09	inferred	TQxy2V	NA	textfile	11	119095761	G	T	437931	0.255261	5.68281	6.64869	0.392702	0.128556	0.150406	0.392702	1	0.00880355900663431	33.9432892249527
23	rs11242113	A	G	-0.0148	0.0025	exposure	TRUE	3.21941618686849e-09	inferred	TQxy2V	NA	textfile	5	131777234	A	G	453665	0.187594	4.18832	6.0778	0.490749	0.113383	0.164533	0.490749	1	-0.00878897	35.0464
24	rs11265180	C	G	0.0328	0.003	exposure	TRUE	7.98598968367222e-28	inferred	TQxy2V	NA	textfile	1	159343648	C	G	453825	0.139013	3.98104	5.4384	0.464154	0.134603	0.183878	0.464154	1	0.016227519824465	119.537777777778
25	rs112875651	A	G	-0.0202	0.0021	exposure	TRUE	6.6443486537567e-22	inferred	TQxy2V	NA	textfile	8	126506694	A	G	432308	0.388167	-15.2746	7.42753	0.0397359	-0.276873	0.134727	0.0398726	1	-0.0146282	92.5260770975057
26	rs112957492	T	C	0.0136	0.0021	exposure	TRUE	9.4067287951469e-11	inferred	TQxy2V	NA	textfile	1	63117010	C	T	455904	0.351845	12.2452	7.48295	0.101754	0.218685	0.133637	0.101754	1	0.00959099996100153	41.9410430839002
27	rs113184201	A	G	0.0144	0.0021	exposure	TRUE	7.02513719345828e-12	inferred	TQxy2V	NA	textfile	7	101843716	A	G	456014	0.334905	15.5712	7.39804	0.0353115	0.284504	0.135274	0.0354511	1	0.0101538950984422	47.0204081632653
28	rs114947103	T	C	-0.0157	0.0026	exposure	TRUE	1.5559050214006e-09	inferred	TQxy2V	NA	textfile	7	105658927	C	T	454007	0.173655	-1.99803	5.91393	0.735475	-0.0571281	0.169092	0.735475	1	-0.00896146	36.4630177514793
29	rs11577023	T	C	0.0148	0.0021	exposure	TRUE	1.82005097238247e-12	inferred	TQxy2V	NA	textfile	1	222061973	C	T	447455	0.307277	8.08653	7.16636	0.259151	0.157458	0.139541	0.259151	1	0.0105352441765029	49.6689342403628
30	rs116073407	A	G	0.0704	0.0085	exposure	TRUE	1.20765044661428e-16	inferred	TQxy2V	NA	textfile	1	159650531	A	G	454745	0.0139529	-1.39405	1.82332	0.444529	-0.419327	0.548449	0.444529	1	0.0122811198114123	68.5973702422146
31	rs11617494	A	G	0.0144	0.0024	exposure	TRUE	1.9731752900754e-09	inferred	TQxy2V	NA	textfile	13	110383798	A	G	447801	0.238144	3.53856	6.60996	0.592416	0.0809896	0.151287	0.592416	1	0.0089658658022586	36
32	rs11658216	T	C	0.0274	0.0024	exposure	TRUE	3.45222144280944e-30	inferred	TQxy2V	NA	textfile	17	76344918	C	T	451324	0.270679	-6.6735	6.93027	0.335572	-0.138949	0.144295	0.335572	1	0.0169915644351161	130.340277777778
33	rs11689543	A	T	-0.0186	0.002	exposure	TRUE	1.40445684808835e-20	inferred	TQxy2V	NA	textfile	2	25130440	T	A	431950	0.431514	-1.07892	7.57158	0.886688	-0.0188199	0.132073	0.886688	1	-0.0141489	86.49
34	rs11711864	A	G	0.0113	0.002	exposure	TRUE	1.60447837013271e-08	inferred	TQxy2V	NA	textfile	3	25363163	A	G	447471	0.442297	-1.84343	7.72295	0.811342	-0.0309073	0.129484	0.811342	1	0.00844600784257931	31.9225
35	rs11729772	A	G	0.0119	0.0021	exposure	TRUE	1.45602201478281e-08	inferred	TQxy2V	NA	textfile	4	55277208	A	G	453241	0.331306	0.877346	7.38154	0.905389	0.0161019	0.135473	0.905389	1	0.00841683176083266	32.1111111111111
36	rs117310449	T	C	-0.2694	0.0101	exposure	TRUE	9.61583113279098e-157	inferred	TQxy2V	NA	textfile	19	45393516	T	C	455863	0.011759	-1.89467	1.69016	0.262288	-0.663251	0.591661	0.262288	1	-0.0394749	711.463189883345
37	rs117344076	T	C	-0.0815	0.0075	exposure	TRUE	1.66161104500436e-27	inferred	TQxy2V	NA	textfile	12	121520277	T	C	452143	0.0179987	-2.53636	2.09456	0.225923	-0.578132	0.477428	0.225923	1	-0.0161586	118.084444444444
38	rs117789739	T	C	0.0379	0.0065	exposure	TRUE	5.51724421224253e-09	inferred	TQxy2V	NA	textfile	19	45623770	T	C	456348	0.0286514	-3.05023	2.61322	0.243117	-0.446665	0.38267	0.243117	1	0.00863102853296776	33.9978698224852
39	rs11782130	T	G	0.0123	0.0021	exposure	TRUE	4.70898043667379e-09	inferred	TQxy2V	NA	textfile	8	22452357	T	G	454598	0.338091	2.04779	7.38731	0.781624	0.0375243	0.135367	0.781624	1	0.00868673604542637	34.3061224489796
40	rs11786900	C	G	-0.0368	0.0035	exposure	TRUE	7.4241222423642e-26	inferred	TQxy2V	NA	textfile	8	9239958	C	G	456348	0.0969786	3.38016	4.62615	0.464985	0.157942	0.216162	0.464985	1	-0.0155625	110.550204081633
41	rs12025074	A	G	-0.0181	0.0023	exposure	TRUE	3.55875858077482e-15	inferred	TQxy2V	NA	textfile	1	198174863	G	A	453633	0.226731	-8.83684	6.53964	0.176608	-0.206628	0.152914	0.176608	1	-0.0116834	61.9300567107751
42	rs12132412	A	G	-0.0182	0.0021	exposure	TRUE	4.44955195702083e-18	inferred	TQxy2V	NA	textfile	1	21820042	G	A	441069	0.388513	9.926	7.51432	0.18652	0.17579	0.133079	0.18652	1	-0.0130486	75.1111111111111
43	rs12202212	T	C	0.0119	0.0021	exposure	TRUE	1.45602201478281e-08	inferred	TQxy2V	NA	textfile	6	136019147	T	C	451489	0.317549	-2.22825	7.2453	0.75843	-0.0424473	0.138021	0.75843	1	0.00843314559097123	32.1111111111111
44	rs1222209	A	C	-0.0146	0.0021	exposure	TRUE	3.5917190257049e-12	inferred	TQxy2V	NA	textfile	11	30361670	C	A	455124	0.345566	8.78314	7.45704	0.238864	0.157949	0.134101	0.238864	1	-0.010305	48.3356009070295
45	rs12239046	T	C	-0.0404	0.002	exposure	TRUE	9.7897273095305e-91	inferred	TQxy2V	NA	textfile	1	247601595	T	C	456348	0.371738	-4.13264	7.55071	0.58416	-0.0724857	0.132438	0.58416	1	-0.0298889	408.04
46	rs12251016	A	T	-0.0144	0.0021	exposure	TRUE	7.02513719345828e-12	inferred	TQxy2V	NA	textfile	10	21821918	T	A	454819	0.342865	-2.90656	7.41835	0.695201	-0.0528159	0.134801	0.695201	1	-0.0101672	47.0204081632653
47	rs123698	C	G	-0.0132	0.0022	exposure	TRUE	1.9731752900754e-09	inferred	TQxy2V	NA	textfile	19	807442	G	C	456348	0.395881	-7.45985	7.66945	0.330716	-0.126824	0.130388	0.330716	1	-0.00888151	36
48	rs1260326	T	C	0.0758	0.002	exposure	TRUE	0	inferred	TQxy2V	NA	textfile	2	27730940	T	C	456348	0.394766	9.07113	7.66592	0.236688	0.154359	0.130448	0.236688	1	0.0560156860548969	1436.41
49	rs12605964	T	C	0.0141	0.0021	exposure	TRUE	1.88989681703488e-11	inferred	TQxy2V	NA	textfile	18	45663787	C	T	435270	0.375158	0.368427	7.42643	0.960433	0.00668024	0.134654	0.960433	1	0.01017651222692	45.0816326530612
50	rs12620844	T	C	-0.0133	0.002	exposure	TRUE	2.93093019546057e-11	inferred	TQxy2V	NA	textfile	2	232324510	C	T	442830	0.431352	9.56027	7.64111	0.210875	0.163741	0.130871	0.210875	1	-0.00999269	44.2225
51	rs12621948	C	G	0.0126	0.0022	exposure	TRUE	1.02058026890757e-08	inferred	TQxy2V	NA	textfile	2	66758912	G	C	446405	0.280302	-2.11603	6.95734	0.761019	-0.0437154	0.143733	0.761019	1	0.00857172751013437	32.801652892562
52	rs12673996	T	C	-0.027	0.0024	exposure	TRUE	2.31592063713728e-29	inferred	TQxy2V	NA	textfile	7	22833400	T	C	451977	0.216554	0.312036	6.42302	0.961253	0.00756356	0.15569	0.961253	1	-0.0167315	126.562
53	rs12716972	A	G	-0.0115	0.002	exposure	TRUE	8.92434490780322e-09	inferred	TQxy2V	NA	textfile	16	29936654	A	G	456348	0.440843	0.311203	7.78334	0.968107	0.00513702	0.12848	0.968107	1	-0.00851148	33.0625
54	rs1292061	A	G	-0.0209	0.002	exposure	TRUE	1.46525228634886e-25	inferred	TQxy2V	NA	textfile	17	57911230	A	G	456348	0.444234	12.0169	7.80018	0.123416	0.197507	0.128202	0.123416	1	-0.0154674	109.203
55	rs12927172	A	G	0.0193	0.002	exposure	TRUE	4.91557296694466e-22	inferred	TQxy2V	NA	textfile	16	27325021	A	G	452970	0.386845	6.0699	7.61936	0.425659	0.104555	0.131245	0.425659	1	0.0143366906719423	93.1225
56	rs12929503	T	C	0.0161	0.002	exposure	TRUE	8.27940363254641e-16	inferred	TQxy2V	NA	textfile	16	69565461	C	T	452616	0.410238	-1.87333	7.66843	0.807005	-0.0318568	0.130405	0.807005	1	0.0119646721059695	64.8025
57	rs12933677	T	C	-0.0137	0.002	exposure	TRUE	7.38499885447122e-12	inferred	TQxy2V	NA	textfile	16	83983775	C	T	448104	0.465362	-1.89923	7.75175	0.806451	-0.0316067	0.129003	0.806451	1	-0.0102324	46.9225
58	rs12972156	C	G	0.2029	0.003	exposure	TRUE	0	inferred	TQxy2V	NA	textfile	19	45387459	G	C	450464	0.145959	-12.3021	5.48024	0.0247797	-0.409621	0.182412	0.0247309	1	0.100262328388212	4574.26777777778
59	rs13021775	C	G	-0.0144	0.002	exposure	TRUE	6.02125596223491e-13	inferred	TQxy2V	NA	textfile	2	37059557	C	G	447071	0.482572	-3.48439	7.75408	0.65317	-0.0579518	0.128964	0.65317	1	-0.0107676	51.84
60	rs13028310	T	C	-0.026	0.0026	exposure	TRUE	1.52397060483211e-23	inferred	TQxy2V	NA	textfile	2	632591	T	C	450667	0.170349	2.44529	5.85131	0.676017	0.0714206	0.170902	0.676017	1	-0.0148945	100
61	rs13066686	A	C	-0.0128	0.002	exposure	TRUE	1.55376951634196e-10	inferred	TQxy2V	NA	textfile	3	94075026	A	C	448677	0.406258	3.68725	7.64034	0.629378	0.0631651	0.130884	0.629378	1	-0.0095542	40.96
62	rs13216424	A	G	0.0152	0.0026	exposure	TRUE	5.03068811238534e-09	inferred	TQxy2V	NA	textfile	6	35054185	A	G	456348	0.17922	-4.32767	6.02675	0.472709	-0.119148	0.165927	0.472709	1	0.00865379999212534	34.1775147928994
63	rs13261587	T	C	0.0204	0.002	exposure	TRUE	1.98272502451198e-24	inferred	TQxy2V	NA	textfile	8	126352397	C	T	455666	0.454638	0.261843	7.79335	0.973198	0.00431113	0.128314	0.973198	1	0.0151087396603257	104.04
64	rs13294945	T	G	0.0137	0.0024	exposure	TRUE	1.14087819250344e-08	inferred	TQxy2V	NA	textfile	9	15852777	G	T	442537	0.36232	5.39597	7.42754	0.467544	0.0978091	0.134634	0.467544	1	0.00858063689789248	32.5850694444445
65	rs1332328	T	C	0.0265	0.0021	exposure	TRUE	1.65814424399626e-36	inferred	TQxy2V	NA	textfile	10	91011458	T	C	443143	0.340953	-12.7441	7.3468	0.082803	-0.236109	0.136114	0.082803	1	0.0189529839928339	159.240362811791
66	rs1338071	C	G	0.0163	0.0022	exposure	TRUE	1.27168114141243e-13	inferred	TQxy2V	NA	textfile	6	153365834	C	G	456107	0.284104	-9.71983	7.07054	0.169226	-0.194426	0.141432	0.169226	1	0.0109699935887943	54.8946280991736
67	rs13416992	A	C	0.0124	0.002	exposure	TRUE	5.64631607408658e-10	inferred	TQxy2V	NA	textfile	2	59298298	A	C	454215	0.396562	-5.26421	7.65066	0.491407	-0.0899364	0.130708	0.491407	1	0.00919906172900374	38.44
68	rs1401454	T	C	-0.0129	0.002	exposure	TRUE	1.11850151518854e-10	inferred	TQxy2V	NA	textfile	11	16250183	T	C	454189	0.387709	-3.19319	7.62255	0.675279	-0.0549571	0.13119	0.675279	1	-0.00957023	41.6025
69	rs141179989	T	C	-0.0572	0.0097	exposure	TRUE	3.70377983703054e-09	inferred	TQxy2V	NA	textfile	16	51067084	T	C	447735	0.0123846	-2.05676	1.73574	0.236039	-0.682672	0.576122	0.236039	1	-0.00881248	34.773514719949
70	rs141783576	C	G	-0.041	0.0046	exposure	TRUE	4.96505016459556e-19	inferred	TQxy2V	NA	textfile	6	127439897	C	G	446670	0.0667484	1.41912	3.83728	0.711512	0.0963772	0.260602	0.711512	1	-0.0133351	79.4423440453687
71	rs141864196	A	G	0.0824	0.0067	exposure	TRUE	9.22632242830909e-35	inferred	TQxy2V	NA	textfile	19	45405499	A	G	455359	0.0263056	-3.39034	2.49194	0.173664	-0.545971	0.401294	0.173664	1	0.0182223457996372	151.253285809757
72	rs141936164	A	G	0.0127	0.0021	exposure	TRUE	1.4700203976131e-09	inferred	TQxy2V	NA	textfile	4	103401723	G	A	454846	0.35378	0.544189	7.5098	0.942233	0.00964925	0.133159	0.942233	1	0.00896676382760766	36.5736961451247
73	rs142503704	A	G	0.0436	0.0079	exposure	TRUE	3.40958750905751e-08	inferred	TQxy2V	NA	textfile	5	92622421	A	G	453782	0.0215147	-0.32694	2.27496	0.885727	-0.0631716	0.439569	0.885727	1	0.00819260747564933	30.4592212786412
74	rs1441169	A	G	0.021	0.002	exposure	TRUE	8.63801263561846e-26	inferred	TQxy2V	NA	textfile	2	214033530	A	G	455751	0.474758	-4.95622	7.80901	0.525637	-0.0812753	0.128057	0.525637	1	0.0155515583161382	110.25
75	rs146424514	A	G	0.0159	0.0027	exposure	TRUE	3.88800725728803e-09	inferred	TQxy2V	NA	textfile	14	35621393	A	G	455072	0.164164	-0.53654	5.81301	0.92646	-0.0158781	0.172028	0.92646	1	0.0087292656434589	34.679012345679
76	rs1470560	A	G	0.0121	0.0021	exposure	TRUE	8.31699274757102e-09	inferred	TQxy2V	NA	textfile	3	35670150	A	G	455914	0.365577	4.53047	7.54723	0.548317	0.079537	0.132499	0.548317	1	0.00853315730628272	33.1995464852608
77	rs147501551	A	G	0.0925	0.0024	exposure	TRUE	0	inferred	TQxy2V	NA	textfile	1	66037512	A	G	411222	0.218848	-7.34042	6.1768	0.234682	-0.192395	0.161896	0.234682	1	0.0599943543279849	1485.46006944444
78	rs1490384	T	C	-0.0279	0.002	exposure	TRUE	3.14605394296096e-44	inferred	TQxy2V	NA	textfile	6	126851160	T	C	456348	0.498962	-2.72018	7.84143	0.728668	-0.0442392	0.127528	0.728668	1	-0.0206459	194.602
79	rs149394327	C	G	0.0593	0.0063	exposure	TRUE	4.835601116e-21	inferred	TQxy2V	NA	textfile	17	64228995	C	G	455679	0.0297479	-0.306056	2.66939	0.908719	-0.0429513	0.374617	0.908719	1	0.0139425873207456	88.5988914084152
80	rs150554721	T	C	0.0742	0.0085	exposure	TRUE	2.56000584890863e-18	inferred	TQxy2V	NA	textfile	19	45490702	T	C	452954	0.0175901	-0.325599	2.064	0.874652	-0.0764302	0.484497	0.874652	1	0.0129694739129282	76.2026297577855
81	rs1545536	T	C	-0.0244	0.0025	exposure	TRUE	1.67155221511366e-22	inferred	TQxy2V	NA	textfile	8	144643169	T	C	454074	0.219056	0.139739	6.47443	0.98278	0.00333362	0.154454	0.98278	1	-0.0144824	95.2576
82	rs1557812	A	G	0.0153	0.0024	exposure	TRUE	1.82962951672172e-10	inferred	TQxy2V	NA	textfile	17	36034365	A	G	438022	0.224539	5.33638	6.43837	0.407195	0.128735	0.155319	0.407195	1	0.00963192455394418	40.6406
83	rs166169	T	C	-0.0188	0.0029	exposure	TRUE	9.00605224312517e-11	inferred	TQxy2V	NA	textfile	5	56194768	T	C	454411	0.146094	4.87484	5.5596	0.380577	0.157715	0.179869	0.380577	1	-0.00961648	42.0261593341261
84	rs16836580	A	G	-0.0336	0.0057	exposure	TRUE	3.75278972594908e-09	inferred	TQxy2V	NA	textfile	1	154945047	A	G	455853	0.0310561	0.588316	2.6711	0.825674	0.0824578	0.374378	0.825674	1	-0.00873045	34.7479224376731
85	rs16988471	A	C	-0.0336	0.0049	exposure	TRUE	7.02513719345833e-12	inferred	TQxy2V	NA	textfile	21	33122575	C	A	455972	0.0438492	3.41401	3.1768	0.282524	0.338286	0.314782	0.282524	1	-0.0101544	47.0204081632653
86	rs17098829	C	G	-0.0129	0.0023	exposure	TRUE	2.03857151272732e-08	inferred	TQxy2V	NA	textfile	12	63455347	C	G	452261	0.246652	-4.98664	6.72723	0.458535	-0.110188	0.14865	0.458535	1	-0.00833975	31.4574669187145
87	rs17138478	A	C	0.0338	0.0032	exposure	TRUE	4.44658849490734e-26	inferred	TQxy2V	NA	textfile	17	36073320	A	C	456348	0.128975	5.82641	5.27965	0.269784	0.209021	0.189406	0.269784	1	0.0156338707326901	111.566
88	rs17196595	T	C	-0.0141	0.0023	exposure	TRUE	8.76392374593679e-10	inferred	TQxy2V	NA	textfile	7	6418378	T	C	451616	0.248966	-5.60309	6.78049	0.408604	-0.121872	0.147482	0.408604	1	-0.00912199	37.5822306238185
89	rs17417252	A	G	-0.015	0.0022	exposure	TRUE	9.21999103859315e-12	inferred	TQxy2V	NA	textfile	1	205216110	G	A	454872	0.257349	-1.62806	6.86171	0.81245	-0.0345783	0.145736	0.81245	1	-0.0101089	46.4876033057851
90	rs174373	T	C	0.0135	0.0024	exposure	TRUE	1.85507974691217e-08	inferred	TQxy2V	NA	textfile	6	111904528	T	C	452251	0.206848	2.48765	6.31789	0.693768	0.0623226	0.158281	0.693768	1	0.00836408672898119	31.6406
91	rs17616063	A	G	0.1338	0.0044	exposure	TRUE	4.16517149916827e-203	inferred	TQxy2V	NA	textfile	16	51436882	G	A	456348	0.0751258	1.34914	4.14756	0.744964	0.0784284	0.241106	0.744964	1	0.0449693638151891	924.712809917355
92	rs17691879	T	C	-0.015	0.0027	exposure	TRUE	2.76730179155376e-08	inferred	TQxy2V	NA	textfile	13	103409119	T	C	455935	0.163677	-3.94095	5.77526	0.494995	-0.118157	0.173152	0.494995	1	-0.00822739	30.8641975308642
93	rs17781691	A	G	0.0188	0.002	exposure	TRUE	5.45630714269223e-21	inferred	TQxy2V	NA	textfile	14	73366493	G	A	447825	0.493362	4.72464	7.77825	0.543575	0.0780916	0.128564	0.543575	1	0.0140453257124237	88.36
94	rs178826	T	C	0.0158	0.002	exposure	TRUE	2.78903429331853e-15	inferred	TQxy2V	NA	textfile	17	16083684	C	T	456339	0.439786	-9.54272	7.78284	0.220152	-0.157542	0.128488	0.220152	1	0.0116937701751633	62.41
95	rs1800693	T	C	0.0218	0.002	exposure	TRUE	1.15257288276712e-27	inferred	TQxy2V	NA	textfile	12	6440009	C	T	456348	0.402351	5.14356	7.68564	0.50334	0.0870771	0.130113	0.50334	1	0.0161332865209826	118.81
96	rs1800961	T	C	-0.1074	0.0059	exposure	TRUE	4.85108134921393e-74	inferred	TQxy2V	NA	textfile	20	43042364	T	C	456348	0.0311276	2.2949	2.73032	0.400614	0.307849	0.366257	0.400614	1	-0.0269369	331.363401321459
97	rs1800973	A	C	0.0294	0.0043	exposure	TRUE	8.07507230234774e-12	inferred	TQxy2V	NA	textfile	12	69744014	A	C	456348	0.0613129	-2.76414	3.73462	0.459215	-0.198184	0.267765	0.459215	1	0.0101206756717517	46.7474310438075
98	rs1811472	C	G	-0.1249	0.002	exposure	TRUE	0	inferred	TQxy2V	NA	textfile	1	159642349	C	G	433330	0.401652	-5.65412	7.48977	0.450302	-0.100792	0.133515	0.450302	1	-0.0944449	3900
99	rs1869358	T	C	0.0169	0.0024	exposure	TRUE	1.89953820054057e-12	inferred	TQxy2V	NA	textfile	2	178180703	T	C	454882	0.227907	-4.50353	6.54687	0.491521	-0.105072	0.152745	0.491521	1	0.0104400690834722	49.5850694444444
100	rs1880241	A	G	0.0252	0.002	exposure	TRUE	2.11144511617729e-36	inferred	TQxy2V	NA	textfile	7	22759469	G	A	452057	0.493297	-5.39563	7.783	0.488148	-0.0890733	0.128485	0.488148	1	0.0187369396788516	158.76
101	rs1905505	A	G	0.0196	0.0022	exposure	TRUE	5.14527100282771e-19	inferred	TQxy2V	NA	textfile	3	170695426	A	G	454907	0.283605	1.55749	7.03437	0.824773	0.0314756	0.142159	0.824773	1	0.0132079419285176	79.3719008264463
102	rs1918912	T	C	-0.0124	0.0022	exposure	TRUE	1.73678442963509e-08	inferred	TQxy2V	NA	textfile	7	115906373	T	C	454394	0.266866	-7.08756	6.91631	0.305476	-0.148166	0.144586	0.305476	1	-0.0083612	31.7685950413223
103	rs1935237	A	C	-0.0198	0.0027	exposure	TRUE	2.24497625427109e-13	inferred	TQxy2V	NA	textfile	9	104109206	C	A	455438	0.158339	-0.139686	5.72818	0.980545	-0.00425717	0.174576	0.980545	1	-0.0108658	53.7777777777778
104	rs1969066	A	G	0.0133	0.0022	exposure	TRUE	1.48989352026046e-09	inferred	TQxy2V	NA	textfile	3	156915895	A	G	456102	0.296793	-13.0651	7.15256	0.0677562	-0.255381	0.13981	0.0677562	1	0.00895120543642229	36.547520661157
105	rs197374	T	C	0.0123	0.002	exposure	TRUE	7.74829469335133e-10	inferred	TQxy2V	NA	textfile	1	112289983	T	C	455365	0.380414	-1.52873	7.59468	0.840472	-0.0265041	0.131671	0.840472	1	0.00911335337189428	37.8225
106	rs2041748	A	G	0.0223	0.0023	exposure	TRUE	3.14621148691064e-22	inferred	TQxy2V	NA	textfile	2	102756295	A	G	452834	0.240334	-9.18152	6.67093	0.168714	-0.20632	0.149904	0.168714	1	0.0144066630359792	94.0056710775047
107	rs2054872	A	C	0.0175	0.0027	exposure	TRUE	9.08263177725513e-11	inferred	TQxy2V	NA	textfile	3	4769176	A	C	452369	0.159173	5.38087	5.72613	0.347369	0.164108	0.174638	0.347369	1	0.00963626338509762	42.0096021947874
108	rs2126886	T	C	-0.0172	0.0024	exposure	TRUE	7.68458321152635e-13	inferred	TQxy2V	NA	textfile	12	21701300	C	T	455388	0.200274	-9.88456	6.25566	0.114084	-0.252587	0.159855	0.114084	1	-0.0106195	51.3611111111111
109	rs2161037	A	G	0.0205	0.002	exposure	TRUE	1.18343538147312e-24	inferred	TQxy2V	NA	textfile	2	169893419	G	A	442328	0.453719	-7.05327	7.67957	0.358386	-0.119596	0.130216	0.358386	1	0.0154099439858002	105.062
110	rs2161374	T	C	-0.0191	0.002	exposure	TRUE	1.29696289061547e-21	inferred	TQxy2V	NA	textfile	5	172176886	T	C	455137	0.484994	2.99637	7.81492	0.701411	0.049062	0.12796	0.701411	1	-0.0141543	91.2025
111	rs2207132	A	G	0.0487	0.006	exposure	TRUE	4.79162514493814e-16	inferred	TQxy2V	NA	textfile	20	39142516	A	G	456348	0.033217	3.13512	2.75599	0.255302	0.41276	0.362846	0.255302	1	0.0120143212573997	65.8802777777778
112	rs2239222	A	G	-0.0359	0.0021	exposure	TRUE	1.61037005810566e-65	inferred	TQxy2V	NA	textfile	14	73011885	G	A	443971	0.347024	-1.26042	7.3593	0.864012	-0.0232724	0.135883	0.864012	1	-0.0256481	292.24716553288
113	rs2260997	T	G	0.0178	0.002	exposure	TRUE	5.58466874987929e-19	inferred	TQxy2V	NA	textfile	20	25256266	T	G	452514	0.44048	5.80746	7.7539	0.453874	0.096593	0.128967	0.453874	1	0.0132293025613353	79.21
114	rs2280406	A	G	0.0222	0.002	exposure	TRUE	1.25443887864341e-28	inferred	TQxy2V	NA	textfile	3	49941436	G	A	456348	0.492363	6.38095	7.8389	0.415639	0.103843	0.127569	0.415639	1	0.0164292309439425	123.21
115	rs2289852	A	G	-0.0313	0.0044	exposure	TRUE	1.13024704501984e-12	inferred	TQxy2V	NA	textfile	5	156738540	A	G	456127	0.0549946	-1.3973	3.55555	0.694325	-0.110529	0.28125	0.694325	1	-0.0105324	50.6038223140496
116	rs2307377	A	G	-0.0221	0.0038	exposure	TRUE	6.03483798977575e-09	inferred	TQxy2V	NA	textfile	6	88367635	G	A	456193	0.0793337	3.33819	4.24418	0.431555	0.18532	0.235617	0.431555	1	-0.00861032	33.8234072022161
117	rs2339102	T	C	0.0125	0.002	exposure	TRUE	4.10452685043788e-10	inferred	TQxy2V	NA	textfile	18	23797853	T	C	445109	0.478092	-1.50575	7.75104	0.845969	-0.025063	0.129015	0.845969	1	0.00936760887187135	39.0625
118	rs2465585	A	G	0.0224	0.0025	exposure	TRUE	3.24678409014024e-19	inferred	TQxy2V	NA	textfile	12	47186260	G	A	456174	0.189754	3.31393	6.1487	0.589911	0.0876552	0.162636	0.589911	1	0.0132649459593297	80.2816
119	rs2542153	T	C	-0.0237	0.002	exposure	TRUE	2.15190809208207e-32	inferred	TQxy2V	NA	textfile	18	12783898	T	C	454175	0.427882	-9.08062	7.73491	0.240403	-0.151777	0.129284	0.240403	1	-0.0175809	140.423
120	rs2596937	T	C	-0.0173	0.0024	exposure	TRUE	5.66408413055607e-13	inferred	TQxy2V	NA	textfile	3	9480906	C	T	455321	0.213787	3.85219	6.42254	0.548644	0.0933888	0.155702	0.548644	1	-0.010682	51.9600694444444
121	rs2608101	T	C	-0.0143	0.0023	exposure	TRUE	5.05488083042279e-10	inferred	TQxy2V	NA	textfile	5	170516570	T	C	418446	0.295866	-7.49269	6.85159	0.274144	-0.159608	0.145951	0.274144	1	-0.00961102	38.656
122	rs2657896	T	C	-0.0233	0.0027	exposure	TRUE	6.1550957137619e-18	inferred	TQxy2V	NA	textfile	12	56929694	T	C	454591	0.165005	6.41563	5.82546	0.270762	0.189051	0.17166	0.270762	1	-0.0127981	74.4705075445816
123	rs2686556	T	C	0.0544	0.0022	exposure	TRUE	5.44475243334071e-135	inferred	TQxy2V	NA	textfile	12	121095331	C	T	445319	0.286556	4.49286	6.99852	0.520891	0.0917298	0.142887	0.520891	1	0.03702914072619	611.438016528925
124	rs2700938	T	C	-0.0236	0.0021	exposure	TRUE	2.65039223044762e-29	inferred	TQxy2V	NA	textfile	7	36085142	C	T	454728	0.376263	10.9615	7.5826	0.148284	0.19065	0.131881	0.148284	1	-0.0166632	126.294784580499
125	rs2701185	A	G	0.0844	0.002	exposure	TRUE	0	inferred	TQxy2V	NA	textfile	12	121352974	A	G	453982	0.486745	-3.92193	7.8222	0.6161	-0.0640977	0.127841	0.6161	1	0.0625092009689341	1780.84
126	rs2726033	A	G	-0.0151	0.0022	exposure	TRUE	6.71293826783918e-12	inferred	TQxy2V	NA	textfile	16	28338039	G	A	455446	0.422875	2.59314	7.7415	0.737651	0.0432689	0.129174	0.737651	1	-0.0101698	47.1095041322314
127	rs2786178	T	C	0.0142	0.0025	exposure	TRUE	1.3469474203115e-08	inferred	TQxy2V	NA	textfile	13	86340082	C	T	448295	0.302322	-6.81656	7.13169	0.339167	-0.134023	0.140219	0.339167	1	0.00848304420364144	32.2624
128	rs28429148	A	G	0.0247	0.0021	exposure	TRUE	6.13347615784945e-32	inferred	TQxy2V	NA	textfile	16	53798319	A	G	432743	0.433058	-3.97579	7.55022	0.598485	-0.0697437	0.132446	0.598485	1	0.0178769830321548	138.342403628118
129	rs288183	T	G	0.0148	0.0026	exposure	TRUE	1.25333727037787e-08	inferred	TQxy2V	NA	textfile	5	107348180	G	T	449780	0.172599	-14.2209	5.87608	0.0155147	-0.411863	0.170436	0.0156696	1	0.00848737947322362	32.4023668639053
130	rs28929474	T	C	-0.1003	0.0074	exposure	TRUE	7.49724091743354e-42	inferred	TQxy2V	NA	textfile	14	94844947	T	C	456348	0.01993	1.08675	2.19088	0.61987	0.226409	0.456437	0.61987	1	-0.0200602	183.712381300219
131	rs2956395	C	G	-0.0145	0.0021	exposure	TRUE	5.02876989584069e-12	inferred	TQxy2V	NA	textfile	11	61519986	G	C	451021	0.335906	6.44868	7.35764	0.38078	0.119122	0.135913	0.38078	1	-0.0102808	47.6757369614512
132	rs2970901	T	G	0.0134	0.002	exposure	TRUE	2.08419539759304e-11	inferred	TQxy2V	NA	textfile	2	88428834	T	G	434350	0.44367	-1.77437	7.61488	0.815751	-0.0305997	0.131322	0.815751	1	0.0101656101039869	44.89
133	rs301798	A	G	-0.0117	0.0021	exposure	TRUE	2.52658950432664e-08	inferred	TQxy2V	NA	textfile	1	8488565	G	A	453631	0.340947	5.99735	7.41601	0.418685	0.109048	0.134843	0.418685	1	-0.00827182	31.0408163265306
134	rs303429	T	C	-0.0152	0.002	exposure	TRUE	2.96130749800962e-14	inferred	TQxy2V	NA	textfile	10	30708441	C	T	456348	0.391262	11.2627	7.63823	0.140343	0.193044	0.13092	0.140343	1	-0.0112496	57.76
135	rs340005	A	G	0.0339	0.0021	exposure	TRUE	1.27500069187266e-58	inferred	TQxy2V	NA	textfile	15	60878030	G	A	456348	0.38018	-5.30346	7.61749	0.48629	-0.0913977	0.131277	0.48629	1	0.0238896240322048	260.591836734694
136	rs34298354	T	C	-0.0278	0.0031	exposure	TRUE	3.02655156238698e-19	inferred	TQxy2V	NA	textfile	1	247588053	T	C	453270	0.121222	-5.3572	5.07929	0.291557	-0.207649	0.196878	0.291557	1	-0.0133189	80.420395421436
137	rs34761529	T	C	-0.0179	0.0025	exposure	TRUE	8.06770609789516e-13	inferred	TQxy2V	NA	textfile	1	22681214	T	C	453056	0.203699	-6.25455	6.30551	0.321237	-0.15731	0.158592	0.321237	1	-0.0106369	51.2656
138	rs34820057	A	G	-0.0135	0.0024	exposure	TRUE	1.85507974691217e-08	inferred	TQxy2V	NA	textfile	8	129174624	G	A	454060	0.228003	4.9057	6.56399	0.454843	0.113858	0.152346	0.454843	1	-0.00834741	31.6406
139	rs34827707	A	G	0.0574	0.007	exposure	TRUE	2.40387030854717e-16	inferred	TQxy2V	NA	textfile	19	45541782	A	G	449174	0.0226939	0.334715	2.34252	0.886379	0.0609972	0.426891	0.886379	1	0.012234184071301	67.24
140	rs34864350	A	G	-0.0301	0.0046	exposure	TRUE	6.01042252328072e-11	inferred	TQxy2V	NA	textfile	14	58759280	G	A	455184	0.0544132	-0.272123	3.54088	0.938741	-0.0217041	0.282415	0.938741	1	-0.0096983	42.8171077504726
141	rs34866669	C	G	0.0137	0.0021	exposure	TRUE	6.85437460468428e-11	inferred	TQxy2V	NA	textfile	18	13737452	C	G	456031	0.339774	-6.68666	7.43044	0.368173	-0.12111	0.134581	0.368173	1	0.00966017016972622	42.5600907029478
142	rs35462231	A	T	0.0212	0.0024	exposure	TRUE	1.01601674721985e-18	inferred	TQxy2V	NA	textfile	7	150294632	T	A	449831	0.222857	-6.29821	6.47612	0.330788	-0.150171	0.154413	0.330788	1	0.0131693163606704	78.0277777777778
143	rs35628191	T	C	-0.012	0.002	exposure	TRUE	1.9731752900754e-09	inferred	TQxy2V	NA	textfile	2	27004254	T	C	452908	0.40557	3.3688	7.66481	0.660289	0.0573419	0.130466	0.660289	1	-0.00891518	36
144	rs35695283	A	G	0.0372	0.0031	exposure	TRUE	3.55296422415536e-33	inferred	TQxy2V	NA	textfile	7	72893403	G	A	456280	0.123308	-0.484575	5.17019	0.925328	-0.0181279	0.193416	0.925328	1	0.0177622492978931	144
145	rs3732356	T	G	-0.0235	0.0042	exposure	TRUE	2.20319204469286e-08	inferred	TQxy2V	NA	textfile	3	119529113	G	T	452314	0.0641546	3.64021	3.80704	0.338982	0.251161	0.262671	0.338982	1	-0.00831926	31.3066893424036
146	rs3768321	T	G	0.0338	0.0025	exposure	TRUE	1.1917579920664e-41	inferred	TQxy2V	NA	textfile	1	40035928	T	G	454857	0.19646	-3.96696	6.1887	0.521523	-0.103576	0.161585	0.521523	1	0.020042549214576	182.79
147	rs3805433	C	G	-0.0151	0.0022	exposure	TRUE	6.71293826783918e-12	inferred	TQxy2V	NA	textfile	5	150435480	G	C	456348	0.273037	2.43197	6.98989	0.727895	0.0497758	0.143064	0.727895	1	-0.0101598	47.1095041322314
148	rs3808348	T	C	-0.0224	0.0025	exposure	TRUE	3.24678409014024e-19	inferred	TQxy2V	NA	textfile	7	1028448	T	C	456348	0.20583	1.12738	6.33962	0.858855	0.0280508	0.157738	0.858855	1	-0.0132624	80.2816
149	rs3935032	T	C	-0.0153	0.0023	exposure	TRUE	2.88795156087716e-11	inferred	TQxy2V	NA	textfile	1	1564194	T	C	427309	0.371757	-11.708	7.34597	0.110982	-0.216962	0.136129	0.110982	1	-0.0101759	44.2514177693762
150	rs4018180	A	G	-0.0317	0.0042	exposure	TRUE	4.43287290494997e-14	inferred	TQxy2V	NA	textfile	16	2169458	A	G	452515	0.0657658	3.22627	3.85453	0.402588	0.217149	0.259435	0.402588	1	-0.0112193	56.9665532879819
151	rs424539	C	G	-0.012	0.0021	exposure	TRUE	1.10165770970394e-08	inferred	TQxy2V	NA	textfile	9	14442595	G	C	453330	0.380119	1.7175	7.57163	0.820554	0.0299583	0.132072	0.820554	1	-0.00848672	32.6530612244898
152	rs4354188	T	C	0.018	0.002	exposure	TRUE	2.25717681190768e-19	inferred	TQxy2V	NA	textfile	6	116327936	C	T	456120	0.423537	-2.0488	7.76496	0.791894	-0.0339798	0.128784	0.791894	1	0.0133249425408845	81
153	rs45499402	C	G	-0.019	0.0033	exposure	TRUE	8.53304779969513e-09	inferred	TQxy2V	NA	textfile	4	89043634	C	G	456226	0.113786	8.51398	5.02267	0.0900545	0.337492	0.199097	0.0900545	1	-0.00852383	33.1496786042241
154	rs4647725	T	C	0.0333	0.0027	exposure	TRUE	5.99158677160995e-35	inferred	TQxy2V	NA	textfile	11	47245389	C	T	455083	0.156046	-0.339954	5.6838	0.952306	-0.0105231	0.175939	0.952306	1	0.018279467831396	152.111111111111
155	rs4690098	T	C	0.0167	0.0024	exposure	TRUE	3.44321760706105e-12	inferred	TQxy2V	NA	textfile	4	3447156	T	C	432864	0.227885	-3.91025	6.43143	0.543193	-0.0945343	0.155486	0.543193	1	0.0105756290861337	48.4184027777778
156	rs469882	A	C	0.0349	0.0025	exposure	TRUE	2.73433849263604e-44	inferred	TQxy2V	NA	textfile	1	91530432	C	A	455166	0.196195	8.79236	6.20507	0.156494	0.228356	0.161158	0.156494	1	0.0206875238791426	194.882
157	rs4714508	A	G	-0.0179	0.0021	exposure	TRUE	1.54389446590309e-17	inferred	TQxy2V	NA	textfile	6	41671677	G	A	446188	0.34396	-0.885888	7.3477	0.904034	-0.0164088	0.136097	0.904034	1	-0.0127597	72.6553287981859
158	rs4755726	T	G	0.0167	0.0022	exposure	TRUE	3.17668777472854e-14	inferred	TQxy2V	NA	textfile	11	43642130	T	G	456043	0.309894	-1.90816	7.24931	0.792381	-0.0363096	0.137944	0.792381	1	0.0112399508022879	57.6219008264463
159	rs4764939	T	C	-0.0201	0.002	exposure	TRUE	9.18674211122609e-24	inferred	TQxy2V	NA	textfile	12	103522952	T	C	453154	0.469047	3.1969	7.79502	0.681718	0.0526131	0.128287	0.681718	1	-0.0149278	101.002
160	rs4776150	A	G	-0.0182	0.002	exposure	TRUE	9.03318298287091e-20	inferred	TQxy2V	NA	textfile	15	53741628	G	A	448356	0.492926	-4.99492	7.75215	0.519364	-0.0831158	0.128996	0.519364	1	-0.0135891	82.81
161	rs4817984	A	C	-0.0344	0.0022	exposure	TRUE	4.11569052245556e-55	inferred	TQxy2V	NA	textfile	21	40465066	A	C	444841	0.279843	1.78208	6.93088	0.797085	0.0370979	0.144282	0.797085	1	-0.0234377	244.495867768595
162	rs4821764	A	G	-0.0132	0.002	exposure	TRUE	4.11157781879905e-11	inferred	TQxy2V	NA	textfile	22	38599364	G	A	455602	0.418614	-13.9929	7.73666	0.0705056	-0.233776	0.129255	0.0705056	1	-0.00977758	43.56
163	rs4832754	T	C	0.0126	0.0022	exposure	TRUE	1.02058026890757e-08	inferred	TQxy2V	NA	textfile	4	38210173	T	C	451417	0.287784	6.15056	7.03629	0.382053	0.12423	0.14212	0.382053	1	0.00852401279657591	32.801652892562
164	rs4842708	T	C	-0.0149	0.002	exposure	TRUE	9.33402317743807e-14	inferred	TQxy2V	NA	textfile	12	90428447	C	T	452644	0.429093	6.18598	7.72918	0.423513	0.103548	0.12938	0.423513	1	-0.0110727	55.5025
165	rs4849147	A	T	-0.0169	0.0022	exposure	TRUE	1.56846344394107e-14	inferred	TQxy2V	NA	textfile	2	113829236	A	T	449307	0.305159	-4.70083	7.15753	0.511331	-0.0917588	0.139713	0.511331	1	-0.0114595	59.0103305785124
166	rs4963725	T	C	0.0163	0.003	exposure	TRUE	5.53109448925126e-08	inferred	TQxy2V	NA	textfile	12	24026288	T	C	453317	0.133332	0.469392	5.31993	0.929692	0.0165853	0.187972	0.929692	1	0.00806960290132569	29.5211111111111
167	rs4988483	A	C	0.0278	0.0051	exposure	TRUE	5.00928938332533e-08	inferred	TQxy2V	NA	textfile	16	1129010	A	C	456348	0.0570508	-0.959385	3.53582	0.786135	-0.0767385	0.28282	0.786135	1	0.00806888187266334	29.7131872356786
168	rs5017416	T	G	0.0268	0.0047	exposure	TRUE	1.18321159799868e-08	inferred	TQxy2V	NA	textfile	6	18492350	T	G	451733	0.0458933	-2.10241	3.24105	0.516544	-0.200146	0.308542	0.516544	1	0.00848362297433962	32.5142598460842
169	rs505922	T	C	-0.0239	0.0021	exposure	TRUE	5.20284167344732e-30	inferred	TQxy2V	NA	textfile	9	136149229	C	T	456348	0.316946	-6.36079	7.27381	0.381858	-0.120223	0.137479	0.381858	1	-0.016845	129.526077097506
170	rs55707100	T	C	0.0692	0.0063	exposure	TRUE	4.55622286765655e-28	inferred	TQxy2V	NA	textfile	15	43820717	T	C	456348	0.0254904	0.793173	2.45827	0.746956	0.131253	0.40679	0.746956	1	0.0162577716009978	120.651045603427
171	rs55772175	T	C	0.0171	0.0021	exposure	TRUE	3.86057669044115e-16	inferred	TQxy2V	NA	textfile	14	96919005	C	T	456120	0.360982	-3.10902	7.52624	0.67954	-0.0548868	0.132869	0.67954	1	0.0120560945552383	66.3061224489796
172	rs55852476	A	G	-0.0201	0.0031	exposure	TRUE	8.93986857881412e-11	inferred	TQxy2V	NA	textfile	1	247696173	A	G	451242	0.172133	-0.354719	5.90665	0.952113	-0.0101672	0.169301	0.952113	1	-0.00965184	42.0405827263267
173	rs55855238	T	C	-0.027	0.0021	exposure	TRUE	7.84221187821492e-38	inferred	TQxy2V	NA	textfile	18	55089715	T	C	456348	0.350685	6.71229	7.4746	0.369179	0.120142	0.133786	0.369179	1	-0.0190291	165.30612244898
174	rs56047269	T	C	0.014	0.0022	exposure	TRUE	1.9703230325373e-10	inferred	TQxy2V	NA	textfile	14	73209388	T	C	456348	0.280422	-1.231	7.03615	0.861116	-0.0248649	0.142123	0.861116	1	0.00941974100597218	40.495867768595
175	rs56187480	A	G	-0.0156	0.0021	exposure	TRUE	1.09776796737863e-13	inferred	TQxy2V	NA	textfile	15	63789479	A	G	449649	0.343827	1.83858	7.40003	0.803782	0.033575	0.135135	0.803782	1	-0.0110775	55.1836734693878
176	rs56877097	A	G	0.0263	0.0031	exposure	TRUE	2.17823303578902e-17	inferred	TQxy2V	NA	textfile	1	65440764	A	G	447899	0.121881	5.3541	5.09663	0.29348	0.20612	0.196208	0.29348	1	0.012675645524066	71.9760665972945
177	rs585406	T	C	0.0116	0.002	exposure	TRUE	6.63149195665233e-09	inferred	TQxy2V	NA	textfile	1	10559598	C	T	444387	0.499266	7.4749	7.71683	0.33272	0.125524	0.129587	0.33272	1	0.0087002525719983	33.64
178	rs58542926	T	C	0.0356	0.0039	exposure	TRUE	6.96443216813322e-20	inferred	TQxy2V	NA	textfile	19	19379549	T	C	456348	0.0749669	19.5603	4.12442	2.11045e-06	1.14987	0.265501	1.48474e-05	1	0.0135113461873822	83.3241288625904
179	rs59737437	T	C	-0.015	0.0023	exposure	TRUE	6.94968112763101e-11	inferred	TQxy2V	NA	textfile	19	2671100	T	C	444113	0.265826	-2.45524	6.82637	0.719094	-0.0526883	0.146491	0.719094	1	-0.00978581	42.5330812854442
180	rs59916403	T	G	0.0166	0.0021	exposure	TRUE	2.68446201523693e-15	inferred	TQxy2V	NA	textfile	2	242370751	T	G	455654	0.352002	-2.31093	7.47908	0.757332	-0.0413133	0.133706	0.757332	1	0.011709608543757	62.4852607709751
181	rs60037105	A	T	0.0183	0.0022	exposure	TRUE	8.9322918129262e-17	inferred	TQxy2V	NA	textfile	16	88528636	A	T	452395	0.31926	7.1222	7.28571	0.328293	0.134175	0.137255	0.328293	1	0.0123662283359006	69.1921487603306
182	rs60669734	T	C	-0.0287	0.0034	exposure	TRUE	3.14159422016304e-17	inferred	TQxy2V	NA	textfile	15	53114083	T	C	455021	0.10022	-6.59807	4.69364	0.159799	-0.2995	0.213054	0.159799	1	-0.0125128	71.2534602076125
183	rs6070563	A	G	-0.0129	0.0021	exposure	TRUE	8.10501732090829e-10	inferred	TQxy2V	NA	textfile	20	57295129	A	G	454446	0.334772	-4.45166	7.36561	0.545588	-0.0820548	0.135766	0.545588	1	-0.00911197	37.734693877551
184	rs6090040	A	C	0.0154	0.002	exposure	TRUE	1.36066230815479e-14	inferred	TQxy2V	NA	textfile	20	62692060	A	C	446220	0.47924	0.0827719	7.74529	0.991473	0.00137977	0.129111	0.991473	1	0.0115262578705489	59.29
185	rs61780878	T	C	0.0735	0.0026	exposure	TRUE	8.26028814459627e-176	inferred	TQxy2V	NA	textfile	1	66166128	C	T	456149	0.16651	4.98724	5.8397	0.393092	0.146244	0.171242	0.393092	1	0.0418197546094404	799.149408284024
186	rs62089592	A	G	0.0142	0.0021	exposure	TRUE	1.36189221901105e-11	inferred	TQxy2V	NA	textfile	17	1322545	G	A	439763	0.388422	0.749514	7.48328	0.920219	0.0133843	0.133631	0.920219	1	0.010196194645552	45.7233560090703
187	rs62104180	A	G	-0.0315	0.0049	exposure	TRUE	1.28808723502673e-10	inferred	TQxy2V	NA	textfile	2	466003	A	G	456348	0.0501514	-1.42787	3.42767	0.676992	-0.121532	0.291743	0.676992	1	-0.00951585	41.3265306122449
188	rs62451586	A	G	-0.02	0.0033	exposure	TRUE	1.35609595233935e-09	inferred	TQxy2V	NA	textfile	7	36178374	A	G	455128	0.108014	1.29176	4.88353	0.791384	0.0541645	0.20477	0.791384	1	-0.00898323	36.7309458218549
189	rs62618693	T	C	-0.0296	0.0051	exposure	TRUE	6.47815885708178e-09	inferred	TQxy2V	NA	textfile	11	32956492	T	C	456348	0.0451487	-1.16601	3.26266	0.720807	-0.109536	0.306498	0.720807	1	-0.00859129	33.6855055747789
190	rs630372	A	G	0.0154	0.0023	exposure	TRUE	2.14711879305748e-11	inferred	TQxy2V	NA	textfile	1	177885762	A	G	455737	0.232844	5.5311	6.62266	0.403618	0.126109	0.150997	0.403618	1	0.00991779969805708	44.8317580340265
191	rs6435156	T	C	0.0137	0.0023	exposure	TRUE	2.57662852085988e-09	inferred	TQxy2V	NA	textfile	2	203425475	T	C	454309	0.254868	8.2315	6.87501	0.231187	0.174154	0.145454	0.231187	1	0.00883692275827723	35.4801512287335
192	rs6443429	A	C	0.0134	0.0021	exposure	TRUE	1.75990030685569e-10	inferred	TQxy2V	NA	textfile	3	176869498	A	C	435263	0.341404	5.12205	7.26421	0.480743	0.0970661	0.137661	0.480743	1	0.00967142155858573	40.7165532879819
193	rs6453434	T	G	0.0184	0.0021	exposure	TRUE	1.91978443806644e-18	inferred	TQxy2V	NA	textfile	5	78570219	G	T	453567	0.355719	-3.08954	7.50832	0.680719	-0.0548035	0.133186	0.680719	1	0.0130089429664131	76.7709750566894
194	rs6486122	T	C	0.0296	0.0021	exposure	TRUE	4.06275300925425e-45	inferred	TQxy2V	NA	textfile	11	13361524	C	T	456348	0.309971	-19.3354	7.2569	0.00771208	-0.367157	0.138164	0.00787451	1	0.0208607911512926	198.675736961451
195	rs6500446	A	G	0.0114	0.002	exposure	TRUE	1.19807428021271e-08	inferred	TQxy2V	NA	textfile	16	89848559	G	A	451223	0.432508	4.97077	7.72433	0.519885	0.0833111	0.129461	0.519885	1	0.00848524856154026	32.49
196	rs6519133	T	C	0.0313	0.0021	exposure	TRUE	3.06904662693827e-50	inferred	TQxy2V	NA	textfile	22	39096602	C	T	453749	0.393919	0.264013	7.63822	0.972427	0.00452524	0.130921	0.972427	1	0.0221213624445091	222.151927437642
197	rs654912	T	C	0.013	0.0022	exposure	TRUE	3.44000832898479e-09	inferred	TQxy2V	NA	textfile	6	138185422	T	C	448115	0.306538	-8.34365	7.16895	0.244481	-0.162347	0.13949	0.244481	1	0.00882693605087748	34.9173553719008
198	rs6573778	T	C	-0.0179	0.002	exposure	TRUE	3.55482356829109e-19	inferred	TQxy2V	NA	textfile	14	24872209	T	C	445756	0.481011	-3.78059	7.74591	0.625496	-0.0630108	0.1291	0.625496	1	-0.0134041	80.1025
199	rs6582586	A	G	0.0114	0.002	exposure	TRUE	1.19807428021271e-08	inferred	TQxy2V	NA	textfile	12	46416742	A	G	452861	0.400508	6.89042	7.66628	0.368761	0.11724	0.130441	0.368761	1	0.00846989010656856	32.49
200	rs6595549	C	G	-0.0155	0.0026	exposure	TRUE	2.49874085415775e-09	inferred	TQxy2V	NA	textfile	5	124139761	C	G	456114	0.178232	-0.849901	6.00641	0.887476	-0.023558	0.166489	0.887476	1	-0.00882685	35.5399408284024
201	rs663015	T	C	-0.0167	0.0021	exposure	TRUE	1.82960618532973e-15	inferred	TQxy2V	NA	textfile	11	72499035	C	T	455789	0.341393	-0.688483	7.45663	0.926435	-0.0123825	0.134109	0.926435	1	-0.0117784	63.2403628117914
202	rs6677719	T	C	0.0558	0.0021	exposure	TRUE	1.45243579434206e-155	inferred	TQxy2V	NA	textfile	1	159723120	C	T	447846	0.350595	16.9172	7.43842	0.0229479	0.305751	0.134601	0.0231147	1	0.0396743165340158	706.040816326531
203	rs6695572	A	G	0.0143	0.0025	exposure	TRUE	1.0652405318911e-08	inferred	TQxy2V	NA	textfile	1	77945635	A	G	454069	0.187185	-9.86821	6.13345	0.107635	-0.262318	0.16304	0.107635	1	0.00848829398343231	32.7184
204	rs66985888	A	G	0.035	0.0059	exposure	TRUE	2.98896033711435e-09	inferred	TQxy2V	NA	textfile	16	51405303	A	G	441012	0.0370591	5.9523	2.89682	0.0399008	0.709322	0.342645	0.0384394	1	0.00893253007623853	35.1910370583166
205	rs6734238	A	G	-0.0449	0.002	exposure	TRUE	1.27971703255307e-111	inferred	TQxy2V	NA	textfile	2	113841030	G	A	456348	0.40256	11.3958	7.688	0.138265	0.192804	0.130073	0.138265	1	-0.0332146	504.002
206	rs6775319	A	T	-0.0131	0.0022	exposure	TRUE	2.60795640260968e-09	inferred	TQxy2V	NA	textfile	3	18758501	A	T	453428	0.267294	-3.6834	6.89828	0.59337	-0.0774046	0.144964	0.59337	1	-0.00884257	35.4566115702479
207	rs6801781	A	G	0.0129	0.0022	exposure	TRUE	4.5283862322701e-09	inferred	TQxy2V	NA	textfile	3	71632266	A	G	441682	0.30211	14.9128	7.08763	0.0353736	0.296863	0.141218	0.0355392	1	0.00882259329268082	34.3822314049587
208	rs685218	A	C	0.0137	0.0021	exposure	TRUE	6.85437460468428e-11	inferred	TQxy2V	NA	textfile	8	9918062	A	C	450948	0.331664	-0.927783	7.32897	0.899264	-0.0172727	0.136445	0.899264	1	0.00971445653869225	42.5600907029478
209	rs687339	T	C	-0.0249	0.0024	exposure	TRUE	3.22212383687151e-25	inferred	TQxy2V	NA	textfile	3	135932359	C	T	454833	0.227592	-14.2599	6.57235	0.0300306	-0.330124	0.152143	0.0300197	1	-0.015382	107.641
210	rs6905544	A	G	-0.015	0.002	exposure	TRUE	6.38178334582179e-14	inferred	TQxy2V	NA	textfile	6	98411631	A	G	453447	0.3983	14.5881	7.63661	0.0560963	0.250148	0.130948	0.0560963	1	-0.0111371	56.25
211	rs6920220	A	G	0.0219	0.0024	exposure	TRUE	7.17362587329946e-20	inferred	TQxy2V	NA	textfile	6	138006504	A	G	456348	0.220675	8.64157	6.52614	0.185454	0.202899	0.15323	0.185454	1	0.0135066029005485	83.2656
212	rs6925389	A	G	-0.0149	0.0021	exposure	TRUE	1.29128978574055e-12	inferred	TQxy2V	NA	textfile	6	7112819	A	G	451832	0.370939	3.35123	7.5368	0.656573	0.058997	0.132682	0.656573	1	-0.0105549	50.3424036281179
213	rs6992315	T	C	-0.0135	0.0022	exposure	TRUE	8.44317721868029e-10	inferred	TQxy2V	NA	textfile	8	73434705	C	T	453477	0.27089	-11.0931	6.94613	0.110262	-0.229915	0.143965	0.110262	1	-0.00911206	37.6549586776859
214	rs7012637	A	G	0.0499	0.002	exposure	TRUE	2.13537558021124e-137	inferred	TQxy2V	NA	textfile	8	9173209	A	G	445481	0.473722	2.13444	7.74214	0.782785	0.0356092	0.129163	0.782785	1	0.037355427162736	622.503
215	rs704017	A	G	0.016	0.002	exposure	TRUE	1.24419211485436e-15	inferred	TQxy2V	NA	textfile	10	80819132	A	G	456348	0.42807	-1.61768	7.76539	0.834979	-0.0268267	0.128777	0.834979	1	0.0118416552001441	64
216	rs7084062	A	G	-0.0133	0.0021	exposure	TRUE	2.39920452311641e-10	inferred	TQxy2V	NA	textfile	10	133736636	G	A	440723	0.491106	-0.822349	7.68544	0.914788	-0.0139225	0.130116	0.914788	1	-0.00953961	40.1111111111111
217	rs7103411	T	C	0.0216	0.0024	exposure	TRUE	2.25717681190764e-19	inferred	TQxy2V	NA	textfile	11	27700125	C	T	456348	0.20847	-10.8157	6.34344	0.0881905	-0.268785	0.157643	0.0881905	1	0.0133216140059822	81
218	rs7127808	A	T	-0.0206	0.0026	exposure	TRUE	2.31704135164278e-15	inferred	TQxy2V	NA	textfile	11	65931919	T	A	455154	0.186524	1.20503	6.09019	0.843151	0.032489	0.164199	0.843151	1	-0.0117432	62.7751479289941
219	rs7217663	T	C	-0.0213	0.0035	exposure	TRUE	1.15973096918669e-09	inferred	TQxy2V	NA	textfile	17	76285388	T	C	445776	0.100015	-3.97554	4.64866	0.39244	-0.183967	0.215116	0.39244	1	-0.00911457	37.0359183673469
220	rs72799497	T	C	-0.0166	0.0027	exposure	TRUE	7.83927972379999e-10	inferred	TQxy2V	NA	textfile	5	132291148	C	T	454679	0.163359	3.08211	5.76752	0.593071	0.0926552	0.173385	0.593071	1	-0.00911748	37.7997256515775
221	rs728455	T	C	0.0136	0.0021	exposure	TRUE	9.4067287951469e-11	inferred	TQxy2V	NA	textfile	2	172034785	T	C	442494	0.383339	7.38743	7.49352	0.32421	0.13156	0.133449	0.32421	1	0.00973523234281122	41.9410430839002
222	rs728538	T	G	-0.0397	0.0027	exposure	TRUE	6.1028411148085e-49	inferred	TQxy2V	NA	textfile	16	51205819	G	T	450101	0.165826	2.84975	5.77829	0.621884	0.0853509	0.173062	0.621884	1	-0.0219113	216.19890260631
223	rs7302913	A	G	-0.0279	0.002	exposure	TRUE	3.14605394296096e-44	inferred	TQxy2V	NA	textfile	12	95856699	A	G	451748	0.426206	7.41193	7.70419	0.336017	0.124876	0.1298	0.336017	1	-0.0207507	194.602
224	rs73137144	A	G	0.0186	0.0026	exposure	TRUE	8.43796311771059e-13	inferred	TQxy2V	NA	textfile	7	74073590	G	A	455597	0.192216	1.15738	6.16785	0.851153	0.0304235	0.162131	0.851153	1	0.0105980443018494	51.1775147928994
225	rs73476799	A	G	-0.0414	0.0071	exposure	TRUE	5.51008359600132e-09	inferred	TQxy2V	NA	textfile	7	150855952	G	A	456115	0.0209728	0.921093	2.22872	0.679399	0.185435	0.448688	0.679399	1	-0.00863355	34.0003967466772
226	rs74616372	T	C	0.0228	0.0036	exposure	TRUE	2.3992045231164e-10	inferred	TQxy2V	NA	textfile	20	44615889	C	T	451415	0.0925966	3.38242	4.55455	0.457695	0.163056	0.219561	0.457695	1	0.00942596930367429	40.1111111111111
227	rs750344	A	G	0.0158	0.0022	exposure	TRUE	6.87903671800715e-13	inferred	TQxy2V	NA	textfile	5	72979436	G	A	451889	0.290925	3.67288	7.07857	0.603849	0.0733021	0.141272	0.603849	1	0.0106830361622313	51.5785123966942
228	rs7528419	A	G	-0.0159	0.0024	exposure	TRUE	3.47248179070409e-11	inferred	TQxy2V	NA	textfile	1	109817192	G	A	456348	0.222645	9.9666	6.52878	0.126869	0.233821	0.153168	0.126869	1	-0.00980659	43.8906
229	rs75460349	A	C	0.0948	0.0067	exposure	TRUE	1.88749639378264e-45	inferred	TQxy2V	NA	textfile	1	27180088	C	A	454702	0.0228248	2.46443	2.31866	0.287841	0.458399	0.431284	0.287841	1	0.0209785501380859	200.201381153932
230	rs7594775	T	C	-0.0147	0.0021	exposure	TRUE	2.55962508777167e-12	inferred	TQxy2V	NA	textfile	2	102300940	C	T	448268	0.34175	-11.2289	7.37727	0.127986	-0.206322	0.135551	0.127986	1	-0.0104546	49
231	rs76014628	T	C	-0.0142	0.0024	exposure	TRUE	3.28531551982718e-09	inferred	TQxy2V	NA	textfile	14	21750929	T	C	448844	0.221096	-8.80846	6.41243	0.169549	-0.214218	0.155947	0.169549	1	-0.00883107	35.0069444444444
232	rs7662792	A	T	-0.0166	0.0021	exposure	TRUE	2.68446201523693e-15	inferred	TQxy2V	NA	textfile	4	45121873	A	T	455530	0.33716	4.92003	7.40339	0.506329	0.0897648	0.135073	0.506329	1	-0.0117112	62.4852607709751
233	rs76856627	A	G	0.0512	0.0064	exposure	TRUE	1.24419211485436e-15	inferred	TQxy2V	NA	textfile	19	45543755	G	A	456348	0.0331479	-0.996783	2.77921	0.719851	-0.12905	0.359815	0.719851	1	0.0118416552001441	64
234	rs77143791	A	G	0.033	0.0051	exposure	TRUE	9.76221269645104e-11	inferred	TQxy2V	NA	textfile	2	113978183	G	A	455388	0.0397167	-2.79934	3.06242	0.360667	-0.298488	0.32654	0.360667	1	0.00958813107784105	41.8685121107267
235	rs77704739	T	C	0.0483	0.0052	exposure	TRUE	1.56534465116578e-20	inferred	TQxy2V	NA	textfile	5	52080909	C	T	456348	0.0421564	5.35855	3.17791	0.0917595	0.530597	0.314672	0.0917595	1	0.0137485093594348	86.2755177514793
236	rs77738620	T	C	-0.0588	0.0099	exposure	TRUE	2.86077682268064e-09	inferred	TQxy2V	NA	textfile	12	100926084	T	C	455929	0.0110313	0.384039	1.60532	0.810928	0.149022	0.622928	0.810928	1	-0.00879585	35.2764003673095
237	rs7794705	A	G	0.0259	0.0027	exposure	TRUE	8.58989283419701e-22	inferred	TQxy2V	NA	textfile	7	99029384	G	A	455899	0.153934	-1.96115	5.65788	0.728874	-0.0612639	0.176745	0.728874	1	0.0142055747049881	92.0178326474622
238	rs7801838	T	C	-0.0128	0.0022	exposure	TRUE	5.94911721928629e-09	inferred	TQxy2V	NA	textfile	7	128573994	T	C	454848	0.307515	-4.03268	7.20013	0.575422	-0.0777882	0.138886	0.575422	1	-0.00862659	33.8512396694215
239	rs78428995	T	C	-0.0203	0.002	exposure	TRUE	3.3136342336054e-24	inferred	TQxy2V	NA	textfile	9	139281847	C	T	455993	0.425959	-19.9857	7.76106	0.0100203	-0.331801	0.129169	0.0102073	1	-0.0150293	103.022
240	rs78511209	C	G	0.0213	0.0035	exposure	TRUE	1.15973096918669e-09	inferred	TQxy2V	NA	textfile	1	91414243	G	C	452582	0.0932892	2.08297	4.53529	0.646033	0.101268	0.220493	0.646033	1	0.00904578187055056	37.0359183673469
241	rs7908825	C	G	-0.0133	0.002	exposure	TRUE	2.93093019546057e-11	inferred	TQxy2V	NA	textfile	10	75554541	C	G	454179	0.413742	4.86685	7.71126	0.527952	0.0818459	0.12968	0.527952	1	-0.00986706	44.2225
242	rs7933202	A	C	0.021	0.002	exposure	TRUE	8.63801263561846e-26	inferred	TQxy2V	NA	textfile	11	59936926	C	A	454315	0.396035	-8.63653	7.635	0.257981	-0.148157	0.130976	0.257981	1	0.0155761107823425	110.25
243	rs797680	T	G	-0.0144	0.002	exposure	TRUE	6.02125596223491e-13	inferred	TQxy2V	NA	textfile	1	93716974	T	G	455821	0.378192	-4.07458	7.61602	0.592649	-0.0702469	0.131302	0.592649	1	-0.0106638	51.84
244	rs7993752	A	C	-0.0134	0.002	exposure	TRUE	2.08419539759304e-11	inferred	TQxy2V	NA	textfile	13	42573980	C	A	436992	0.411167	9.77574	7.5504	0.195413	0.171478	0.132443	0.195413	1	-0.0101348	44.89
245	rs79941637	A	T	0.0292	0.0045	exposure	TRUE	8.64717062347028e-11	inferred	TQxy2V	NA	textfile	7	22876582	T	A	455453	0.0549738	0.538127	3.56343	0.879965	0.0423788	0.280629	0.879965	1	0.00961456043644057	42.1056790123457
246	rs8072566	A	G	-0.0204	0.0025	exposure	TRUE	3.35024591837384e-16	inferred	TQxy2V	NA	textfile	17	40476363	A	G	442348	0.189536	13.0144	6.03017	0.0309116	0.357902	0.165756	0.0308336	1	-0.0122681	66.5856
247	rs835278	A	T	0.015	0.0021	exposure	TRUE	9.14106165438673e-13	inferred	TQxy2V	NA	textfile	10	94809799	T	A	454970	0.386399	1.24327	7.62913	0.870547	0.0213607	0.131077	0.870547	1	0.0105890546269869	51.0204081632653
248	rs846881	A	C	-0.0207	0.0025	exposure	TRUE	1.2317528115466e-16	inferred	TQxy2V	NA	textfile	19	45078553	C	A	446748	0.217344	12.9703	6.40303	0.042801	0.316358	0.156126	0.0427345	1	-0.012387	68.5584
249	rs9611441	C	G	-0.0158	0.002	exposure	TRUE	2.78903429331853e-15	inferred	TQxy2V	NA	textfile	22	41339367	C	G	453964	0.466566	0.606492	7.798	0.938007	0.00997375	0.128238	0.938007	1	-0.0117243	62.41
250	rs9738365	A	C	0.0212	0.0023	exposure	TRUE	3.04415932921692e-20	inferred	TQxy2V	NA	textfile	12	31997635	A	C	453594	0.2652	-0.668747	6.90862	0.922886	-0.0140113	0.144747	0.922886	1	0.0136846805129723	84.9603024574669
251	rs9788721	T	C	-0.0121	0.0021	exposure	TRUE	8.31699274757102e-09	inferred	TQxy2V	NA	textfile	15	78802869	C	T	456348	0.340366	-1.22617	7.40576	0.868495	-0.022357	0.13503	0.868495	1	-0.0085291	33.1995464852608
252	rs991946	T	C	0.0112	0.002	exposure	TRUE	2.14351805166219e-08	inferred	TQxy2V	NA	textfile	6	166329862	T	C	452676	0.478185	-3.0225	7.79634	0.698251	-0.0497262	0.128265	0.698251	1	0.00832300601958663	31.36
253	rs992072	T	G	-0.0148	0.0022	exposure	TRUE	1.72872544206996e-11	inferred	TQxy2V	NA	textfile	17	68258208	G	T	449991	0.288175	16.5962	7.03956	0.0183952	0.334902	0.142282	0.0185827	1	-0.010028	45.2561983471074
254	rs994596	T	C	0.0137	0.0021	exposure	TRUE	6.85437460468428e-11	inferred	TQxy2V	NA	textfile	4	18459828	T	C	455809	0.320269	1.57955	7.30236	0.828749	0.0296215	0.136942	0.828749	1	0.00966252214823797	42.5600907029478
255	rs9965184	A	T	0.0118	0.0021	exposure	TRUE	1.92012934444188e-08	inferred	TQxy2V	NA	textfile	18	40776606	T	A	452060	0.343635	-8.87261	7.40876	0.231079	-0.161644	0.134975	0.231079	1	0.0083570012465934	31.5736961451247
256	rs9977825	T	C	0.0122	0.0021	exposure	TRUE	6.26507841569735e-09	inferred	TQxy2V	NA	textfile	21	46494995	T	C	451058	0.359096	4.84222	7.48162	0.517493	0.0865073	0.133661	0.517493	1	0.00864985955946265	33.750566893424
F-statistic was calculated using the following formulas: F=R^2 (n-2)⁄(1-R^2) and R^2=2×MAF×(1-MAF)×β^2, where F represents F-statistic, R^2 represents the phenotypic variance explained by a genetic instrument, N is the sample size, β is the estimated genetic association of SNP with the exposure, MAF is the minor allele frequency. SNP: single nucleotide polymorphisms.

## Sheet: S2
Tab S2. Characteristics of GWAS-identified LDL-associated genetic instruments.
	SNP	effect_allele.exposure	other_allele.exposure	beta.exposure	se.exposure	exposure	mr_keep.exposure	pval.exposure	pval_origin.exposure	id.exposure	eaf.exposure	data_source.exposure	chromosome	base_pair_location	effect_allele	other_allele	N	effect_allele_frequency	T	SE_T	P_noSPA	beta	standard_error	p_value	CONVERGE	R	F
1	rs10128711	C	T	0.0217	0.0027	exposure	TRUE	9.20368569789399e-16	inferred	Rn5m8z	NA	textfile	11	18632984	T	C	456348	0.260404	0.562685	6.89007	0.934912	0.0118527	0.145136	0.934912	1	0.0118964699369916	64.5939643347051
2	rs1013907	C	T	-0.0188	0.0033	exposure	TRUE	1.21955593431921e-08	inferred	Rn5m8z	NA	textfile	6	35201858	T	C	456348	0.155671	-5.33098	5.68994	0.348803	-0.164662	0.175749	0.348803	1	-0.00843299	32.455463728191
3	rs10184376	T	C	-0.0284	0.0044	exposure	TRUE	1.08544196073898e-10	inferred	Rn5m8z	NA	textfile	2	158442005	T	C	456348	0.0757131	7.17995	4.1685	0.0849918	0.413201	0.239894	0.0849918	1	-0.0095543	41.6611570247934
4	rs10231964	A	G	0.0206	0.0024	exposure	TRUE	9.21627980301525e-18	inferred	Rn5m8z	NA	textfile	7	21464575	A	G	456348	0.399467	-1.9527	7.67652	0.799207	-0.0331365	0.130267	0.799207	1	0.0127049745848837	73.6736111111111
5	rs10455872	G	A	0.1321	0.0044	exposure	TRUE	4.95758919978378e-198	inferred	Rn5m8z	NA	textfile	6	161010118	G	A	456348	0.0795939	5.48693	4.23061	0.194645	0.306566	0.236373	0.194645	1	0.0443991377298263	901.364152892562
6	rs10484561	G	T	0.0576	0.0036	exposure	TRUE	1.27775088010762e-57	inferred	Rn5m8z	NA	textfile	6	32665420	G	T	456348	0.119594	-11.1258	5.06623	0.0280864	-0.433474	0.19729	0.0280104	1	0.0236783304903026	256
7	rs10491298	G	A	0.0223	0.0039	exposure	TRUE	1.07817668657014e-08	inferred	Rn5m8z	NA	textfile	5	141901534	G	A	456348	0.106093	-0.0666141	4.82985	0.988996	-0.00285561	0.207046	0.988996	1	0.00846403742447588	32.6949375410914
8	rs10495703	T	C	-0.0173	0.0024	exposure	TRUE	5.66408413055607e-13	inferred	Rn5m8z	NA	textfile	2	20350783	C	T	456348	0.498245	-11.5085	7.83141	0.141689	-0.187646	0.127691	0.141689	1	-0.01067	51.9600694444444
9	rs1057868	T	C	0.0179	0.0026	exposure	TRUE	5.794387216744e-12	inferred	Rn5m8z	NA	textfile	7	75615006	T	C	456348	0.284762	2.00253	7.08238	0.77737	0.0399228	0.141196	0.77737	1	0.0101908405456315	47.3979289940828
10	rs1058727	G	A	-0.0213	0.0029	exposure	TRUE	2.0602450162426e-13	inferred	Rn5m8z	NA	textfile	7	1087095	G	A	456348	0.221601	1.16648	6.51704	0.857946	0.0274648	0.153444	0.857946	1	-0.010872	53.9464922711058
11	rs10791660	A	C	-0.0241	0.0031	exposure	TRUE	7.59295691546294e-15	inferred	Rn5m8z	NA	textfile	11	103871039	A	C	456348	0.185188	0.301015	6.09787	0.960629	0.00809529	0.163992	0.960629	1	-0.0115075	60.4380853277836
12	rs10794579	C	T	0.0221	0.0024	exposure	TRUE	3.31227709931927e-20	inferred	Rn5m8z	NA	textfile	10	124686656	T	C	456348	0.42455	-5.48283	7.75005	0.479283	-0.0912841	0.129031	0.479283	1	0.0136299280609496	84.7934027777778
13	rs10876171	A	G	-0.0156	0.0025	exposure	TRUE	4.37570893605808e-10	inferred	Rn5m8z	NA	textfile	12	51793821	G	A	456348	0.361867	0.301127	7.53002	0.968101	0.00531077	0.132802	0.968101	1	-0.00923674	38.9376
14	rs10903129	G	A	0.0312	0.0024	exposure	TRUE	1.22343287990998e-38	inferred	Rn5m8z	NA	textfile	1	25768937	A	G	456348	0.441878	-15.736	7.7887	0.0433459	-0.259396	0.128488	0.0435036	1	0.0192404766309907	169
15	rs10919615	T	C	0.0158	0.0028	exposure	TRUE	1.67251118030662e-08	inferred	Rn5m8z	NA	textfile	1	198974904	C	T	456348	0.243974	3.84847	6.74162	0.5681	0.0846759	0.148332	0.5681	1	0.00835289035174267	31.8418367346939
16	rs11038642	T	C	0.0186	0.0034	exposure	TRUE	4.48544324636185e-08	inferred	Rn5m8z	NA	textfile	11	5690003	T	C	456348	0.140631	11.2036	5.45675	0.0400567	0.376261	0.183053	0.0398327	1	0.00809790472768264	29.9273356401384
17	rs11057602	C	T	-0.015	0.0024	exposure	TRUE	4.10452685043788e-10	inferred	Rn5m8z	NA	textfile	12	124852609	T	C	456348	0.389361	3.39334	7.64197	0.657013	0.0581055	0.130856	0.657013	1	-0.00925155	39.0625
18	rs11079784	C	T	-0.0334	0.0024	exposure	TRUE	5.0176500514718e-44	inferred	Rn5m8z	NA	textfile	17	45702280	C	T	456348	0.499661	0.84297	7.83465	0.914317	0.0137332	0.127638	0.914317	1	-0.0205966	193.673611111111
19	rs11088472	C	A	0.0182	0.0024	exposure	TRUE	3.36788097231433e-14	inferred	Rn5m8z	NA	textfile	21	40699376	A	C	456348	0.429512	2.47393	7.74362	0.749363	0.0412571	0.129139	0.749363	1	0.0112249821707711	57.5069444444445
20	rs11136343	G	A	0.0234	0.0024	exposure	TRUE	1.84468270498785e-22	inferred	Rn5m8z	NA	textfile	8	145058986	G	A	456348	0.384022	-4.41834	7.62307	0.562184	-0.0760324	0.131181	0.562184	1	0.014431526190783	95.0625
21	rs11170555	G	A	0.0192	0.0031	exposure	TRUE	5.88246187115758e-10	inferred	Rn5m8z	NA	textfile	12	53824143	G	A	456348	0.178707	9.26547	5.9996	0.122504	0.257408	0.166678	0.122504	1	0.00916799057904362	38.3600416233091
22	rs11220462	A	G	0.053	0.0035	exposure	TRUE	8.44630345033461e-52	inferred	Rn5m8z	NA	textfile	11	126243952	A	G	456348	0.132729	1.45821	5.30776	0.783522	0.0517606	0.188403	0.783522	1	0.0224105035910362	229.30612244898
23	rs1128249	T	G	-0.0196	0.0024	exposure	TRUE	3.17027304844022e-16	inferred	Rn5m8z	NA	textfile	2	165528624	T	G	456348	0.392226	-9.22025	7.65312	0.228292	-0.157422	0.130666	0.228292	1	-0.0120883	66.6944444444445
24	rs1135688	C	T	-0.0176	0.0026	exposure	TRUE	1.29468895208931e-11	inferred	Rn5m8z	NA	textfile	17	73827205	C	T	456348	0.31282	16.3846	7.26264	0.0240701	0.310632	0.137811	0.0241929	1	-0.0100201	45.8224852071006
25	rs114166723	A	G	-0.0609	0.0083	exposure	TRUE	2.17865328692063e-13	inferred	Rn5m8z	NA	textfile	1	109777764	A	G	456348	0.0217345	1.60216	2.30132	0.486309	0.302518	0.434533	0.486309	1	-0.0108609	53.8366961823196
26	rs11563251	T	C	0.0292	0.0037	exposure	TRUE	2.97639514543601e-15	inferred	Rn5m8z	NA	textfile	2	234679384	T	C	456348	0.110404	-1.21522	4.92443	0.805083	-0.0501122	0.203069	0.805083	1	0.011681654818943	62.281957633309
27	rs11591147	T	G	-0.4782	0.0092	exposure	TRUE	0	inferred	Rn5m8z	NA	textfile	1	55505647	T	G	456348	0.0175864	2.52527	2.09606	0.228292	0.57478	0.477086	0.228292	1	-0.0767172	2701.73960302458
28	rs11601507	A	C	0.0518	0.0046	exposure	TRUE	2.04728509053748e-29	inferred	Rn5m8z	NA	textfile	11	5701074	A	C	456348	0.0691216	4.72977	4.05419	0.243357	0.287761	0.246658	0.243357	1	0.0166672700675561	126.807183364839
29	rs11610045	A	G	0.0148	0.0025	exposure	TRUE	3.21941618686849e-09	inferred	Rn5m8z	NA	textfile	12	133063768	A	G	454203	0.495468	3.0543	7.82833	0.696418	0.0498395	0.127741	0.696418	1	0.00878376906430495	35.0464
30	rs11613352	T	C	-0.0232	0.0028	exposure	TRUE	1.17402320263789e-16	inferred	Rn5m8z	NA	textfile	12	57792580	T	C	456348	0.241112	-14.856	6.69199	0.0264206	-0.331736	0.149252	0.0262393	1	-0.0122645	68.6530612244898
31	rs11683091	T	C	0.0143	0.0025	exposure	TRUE	1.0652405318911e-08	inferred	Rn5m8z	NA	textfile	2	21942735	T	C	456348	0.343318	-12.1266	7.45986	0.10404	-0.21791	0.134051	0.10404	1	0.00846707363281134	32.7184
32	rs117264457	A	G	-0.0708	0.0078	exposure	TRUE	1.11687490055329e-19	inferred	Rn5m8z	NA	textfile	19	45404432	A	G	456348	0.0245931	1.90129	2.43697	0.435282	0.320145	0.410345	0.435282	1	-0.0134355	82.3905325443787
33	rs11737560	T	C	-0.0201	0.0036	exposure	TRUE	2.35951889941825e-08	inferred	Rn5m8z	NA	textfile	4	120131644	T	C	456348	0.124762	-5.72372	5.18563	0.269694	-0.212851	0.192841	0.269694	1	-0.00826479	31.1736111111111
34	rs117733303	G	A	0.1538	0.0089	exposure	TRUE	6.55189328466377e-67	inferred	Rn5m8z	NA	textfile	6	160922870	G	A	456348	0.0184848	2.4531	2.11346	0.245763	0.549195	0.473157	0.245763	1	0.0255727334345832	298.629465976518
35	rs11999525	A	G	-0.0166	0.0027	exposure	TRUE	7.83927972379999e-10	inferred	Rn5m8z	NA	textfile	9	139371342	A	G	456348	0.260304	-14.0788	6.8742	0.0405534	-0.297935	0.145439	0.0405091	1	-0.00910079	37.7997256515775
36	rs12162782	G	T	0.0153	0.0026	exposure	TRUE	3.98980713439809e-09	inferred	Rn5m8z	NA	textfile	22	50853626	G	T	456348	0.344177	3.01856	7.46022	0.685756	0.0542371	0.134044	0.685756	1	0.00871072858104115	34.6286982248521
37	rs1229984	C	T	0.0774	0.0078	exposure	TRUE	3.30410314302728e-23	inferred	Rn5m8z	NA	textfile	4	100239319	T	C	456348	0.0248034	-2.65372	2.353	0.259404	-0.479303	0.424989	0.259404	1	0.0146876523457636	98.4674556213018
38	rs12336893	G	T	-0.0336	0.0051	exposure	TRUE	4.45084905827447e-11	inferred	Rn5m8z	NA	textfile	9	2632365	G	T	456348	0.0540881	-1.16232	3.52872	0.741863	-0.0933448	0.283389	0.741863	1	-0.00975217	43.4048442906574
39	rs12670798	C	T	0.0386	0.0027	exposure	TRUE	2.30768354813096e-46	inferred	Rn5m8z	NA	textfile	7	21607352	C	T	456348	0.246987	4.43977	6.75941	0.511291	0.0971726	0.147942	0.511291	1	0.0211582227148175	204.384087791495
40	rs12691088	A	G	0.2101	0.0084	exposure	TRUE	4.53723379442747e-138	inferred	Rn5m8z	NA	textfile	19	45418486	A	G	445402	0.0147923	-0.517403	1.8677	0.78176	-0.148325	0.535418	0.78176	1	0.0374512981133053	625.595379818594
41	rs12721109	A	G	-0.4409	0.0076	exposure	TRUE	0	inferred	Rn5m8z	NA	textfile	19	45447221	A	G	456348	0.025749	1.51662	2.50968	0.54564	0.24079	0.398457	0.54564	1	-0.0855626	3365.52648891967
42	rs12916	C	T	0.0836	0.0024	exposure	TRUE	7.61325326909509e-266	inferred	Rn5m8z	NA	textfile	5	74656539	C	T	456348	0.400119	3.86041	7.68066	0.615236	0.0654389	0.130197	0.615236	1	0.0514957411712968	1213.36111111111
43	rs12968116	T	C	0.0211	0.0036	exposure	TRUE	4.59780182348459e-09	inferred	Rn5m8z	NA	textfile	18	55322502	T	C	456348	0.123966	-4.64395	5.17235	0.36927	-0.173585	0.193336	0.36927	1	0.00867593889784383	34.3526234567901
44	rs13107325	T	C	-0.0342	0.0046	exposure	TRUE	1.04740071116828e-13	inferred	Rn5m8z	NA	textfile	4	103188709	T	C	456348	0.0747741	1.11481	4.17041	0.789228	0.0640976	0.239785	0.789228	1	-0.0110051	55.2759924385633
45	rs13301187	A	C	0.0205	0.0031	exposure	TRUE	3.76854834422382e-11	inferred	Rn5m8z	NA	textfile	9	78068052	A	C	456348	0.177359	-10.5327	5.98453	0.0784114	-0.294088	0.167097	0.0784114	1	0.00978868234777129	43.7304890738814
46	rs13315871	A	G	-0.0412	0.0042	exposure	TRUE	1.0245087675947e-22	inferred	Rn5m8z	NA	textfile	3	58381287	A	G	456348	0.0873752	-1.4834	4.42888	0.737672	-0.0756258	0.225791	0.737672	1	-0.0145196	96.2267573696145
47	rs13429458	C	A	0.0218	0.0038	exposure	TRUE	9.6458103371325e-09	inferred	Rn5m8z	NA	textfile	2	43638838	C	A	456348	0.106283	3.86014	4.83363	0.424522	0.165217	0.206884	0.424522	1	0.0084920024923876	32.9113573407202
48	rs138354	C	T	-0.0183	0.0024	exposure	TRUE	2.44034386357983e-14	inferred	Rn5m8z	NA	textfile	22	41272143	T	C	456348	0.466186	-1.17735	7.81732	0.880285	-0.019266	0.127921	0.880285	1	-0.0112867	58.1406
49	rs140584594	G	A	-0.0193	0.0027	exposure	TRUE	8.79563598484334e-13	inferred	Rn5m8z	NA	textfile	1	110232983	A	G	456348	0.269619	-10.2309	6.99543	0.143601	-0.209067	0.142951	0.143601	1	-0.0105809	51.0960219478738
50	rs140970775	G	A	0.0273	0.0049	exposure	TRUE	2.52658950432664e-08	inferred	Rn5m8z	NA	textfile	1	161503013	G	A	447804	0.0701713	-3.33753	3.93162	0.39594	-0.215914	0.254348	0.39594	1	0.0083254650274797	31.0408163265306
51	rs146534110	T	G	0.0922	0.0105	exposure	TRUE	1.62096170830333e-18	inferred	Rn5m8z	NA	textfile	6	160578069	T	G	456348	0.0133703	-2.3324	1.81068	0.1977	-0.711408	0.552279	0.1977	1	0.0129974397034167	77.1051247165533
52	rs1491942	G	C	0.0168	0.003	exposure	TRUE	2.14351805166219e-08	inferred	Rn5m8z	NA	textfile	12	40620808	G	C	456348	0.199537	-1.10896	6.27354	0.859691	-0.0281768	0.1594	0.859691	1	0.00828945505412612	31.36
53	rs1497406	G	A	0.0163	0.0024	exposure	TRUE	1.10845427505478e-11	inferred	Rn5m8z	NA	textfile	1	16505320	A	G	456348	0.420065	-29.3898	7.75438	0.000150596	-0.488767	0.12999	0.000169892	1	0.0100532687102854	46.1267361111111
54	rs15285	T	C	-0.0284	0.0026	exposure	TRUE	8.94143688337361e-28	inferred	Rn5m8z	NA	textfile	8	19824667	T	C	456348	0.285302	-6.93675	7.06886	0.32644	-0.138822	0.141466	0.32644	1	-0.0161674	119.313609467456
55	rs1532085	G	A	-0.0287	0.0024	exposure	TRUE	5.87288259879172e-33	inferred	Rn5m8z	NA	textfile	15	58683366	A	G	456348	0.386299	15.4469	7.62835	0.0428744	0.265448	0.131194	0.0430391	1	-0.0176993	143.001736111111
56	rs1653636	C	T	-0.0149	0.0026	exposure	TRUE	9.99762052749751e-09	inferred	Rn5m8z	NA	textfile	1	174736877	T	C	456348	0.283816	-0.968801	7.06715	0.890963	-0.0193975	0.1415	0.890963	1	-0.00848301	32.8417159763314
57	rs1689800	G	A	0.0156	0.0025	exposure	TRUE	4.37570893605808e-10	inferred	Rn5m8z	NA	textfile	1	182168885	G	A	456348	0.359454	-2.81455	7.50325	0.707578	-0.049993	0.133276	0.707578	1	0.00923674466379794	38.9376
58	rs16926246	T	C	-0.0324	0.0035	exposure	TRUE	2.09975589034874e-20	inferred	Rn5m8z	NA	textfile	10	71093392	T	C	456348	0.130388	-0.956025	5.27326	0.856135	-0.0343804	0.189636	0.856135	1	-0.0137022	85.694693877551
59	rs16937390	C	T	0.0347	0.0044	exposure	TRUE	3.11119173419842e-15	inferred	Rn5m8z	NA	textfile	9	19217780	C	T	456348	0.0766104	-1.7656	4.15892	0.671177	-0.102078	0.240447	0.671177	1	0.0116734729570484	62.1947314049587
60	rs17050272	A	G	-0.0263	0.0024	exposure	TRUE	6.0605195741753e-28	inferred	Rn5m8z	NA	textfile	2	121306440	A	G	456348	0.410052	-6.63027	7.70268	0.389362	-0.11175	0.129825	0.389362	1	-0.0162196	120.085069444444
61	rs17129638	C	T	-0.0192	0.0033	exposure	TRUE	5.94911721928632e-09	inferred	Rn5m8z	NA	textfile	10	113981435	C	T	456348	0.147957	-2.41693	5.56817	0.664244	-0.077954	0.179592	0.664244	1	-0.0086124	33.8512396694215
62	rs17136255	T	C	-0.0167	0.0031	exposure	TRUE	7.1604884254907e-08	inferred	Rn5m8z	NA	textfile	16	400475	T	C	456348	0.185058	4.21139	6.1024	0.490119	0.11309	0.16387	0.490119	1	-0.00797432	29.0208116545265
63	rs174546	T	C	-0.0407	0.0025	exposure	TRUE	1.36868945475506e-59	inferred	Rn5m8z	NA	textfile	11	61569830	T	C	456348	0.344869	-4.5009	7.46555	0.546582	-0.0807563	0.133949	0.546582	1	-0.0240925	265.038
64	rs17512204	A	G	-0.0471	0.0043	exposure	TRUE	6.39369048661295e-28	inferred	Rn5m8z	NA	textfile	2	118732831	A	G	456348	0.0830638	4.06884	4.38574	0.353541	0.211536	0.228012	0.353541	1	-0.0162124	119.978907517577
65	rs17580	A	T	0.0446	0.0056	exposure	TRUE	1.66180885773707e-15	inferred	Rn5m8z	NA	textfile	14	94847262	A	T	456348	0.0478867	-4.78401	3.34474	0.152628	-0.42763	0.298977	0.152628	1	0.0117887980313596	63.4298469387755
66	rs17605615	A	G	0.0195	0.0024	exposure	TRUE	4.47362412888821e-16	inferred	Rn5m8z	NA	textfile	4	87996745	A	G	456348	0.398862	-6.53226	7.68384	0.395253	-0.110639	0.130143	0.395253	1	0.012026654506262	66.0156
67	rs17789218	C	T	-0.0243	0.0028	exposure	TRUE	4.00770815380283e-18	inferred	Rn5m8z	NA	textfile	6	100600097	C	T	456348	0.243905	1.38237	6.71989	0.837015	0.0306126	0.148812	0.837015	1	-0.0128459	75.3176020408163
68	rs179442	T	C	-0.0272	0.0025	exposure	TRUE	1.43562965698082e-27	inferred	Rn5m8z	NA	textfile	8	116669769	T	C	456348	0.338556	-1.12712	7.41251	0.879143	-0.0205134	0.134907	0.879143	1	-0.0161037	118.374
69	rs1800588	T	C	0.0321	0.0029	exposure	TRUE	1.77437020125196e-28	inferred	Rn5m8z	NA	textfile	15	58723675	T	C	456348	0.216174	-1.26129	6.4565	0.845117	-0.0302567	0.154883	0.845117	1	0.0163833088145456	122.521997621879
70	rs1800961	T	C	-0.0773	0.0069	exposure	TRUE	3.94607267640679e-29	inferred	Rn5m8z	NA	textfile	20	43042364	T	C	456348	0.0311276	2.2949	2.73032	0.400614	0.307849	0.366257	0.400614	1	-0.0165815	125.504935937828
71	rs1801689	C	A	0.0937	0.007	exposure	TRUE	7.328938546694e-41	inferred	Rn5m8z	NA	textfile	17	64210580	C	A	456348	0.030228	-0.496099	2.69353	0.853871	-0.0683793	0.37126	0.853871	1	0.0198111270865501	179.177346938775
72	rs1808458	T	C	0.0462	0.0053	exposure	TRUE	2.85717734943203e-18	inferred	Rn5m8z	NA	textfile	2	118879253	T	C	456348	0.0548594	-2.72858	3.59569	0.447944	-0.211044	0.278111	0.447944	1	0.0129027662006901	75.9857600569598
73	rs1883025	T	C	-0.0363	0.0027	exposure	TRUE	3.31888997486556e-41	inferred	Rn5m8z	NA	textfile	9	107664301	T	C	456348	0.254378	3.85827	6.84769	0.573135	0.0822819	0.146035	0.573135	1	-0.019898	180.753086419753
74	rs1902023	C	A	0.0157	0.0024	exposure	TRUE	6.08369832280397e-11	inferred	Rn5m8z	NA	textfile	4	69536084	C	A	456348	0.475437	-6.07715	7.82459	0.437351	-0.0992607	0.127802	0.437351	1	0.00968324510098854	42.7934027777778
75	rs1919128	G	A	0.0429	0.0027	exposure	TRUE	7.56567249748266e-57	inferred	Rn5m8z	NA	textfile	2	27801759	G	A	456348	0.255635	8.90656	6.85104	0.193591	0.189756	0.145963	0.193591	1	0.023513988873572	252.456790123457
76	rs1997833	C	T	0.0311	0.0027	exposure	TRUE	1.06425053064782e-30	inferred	Rn5m8z	NA	textfile	20	39690342	C	T	455671	0.299722	0.522195	7.16602	0.941909	0.010169	0.139548	0.941909	1	0.017061164322963	132.676268861454
77	rs2000999	A	G	0.0683	0.003	exposure	TRUE	9.81312936783552e-115	inferred	Rn5m8z	NA	textfile	16	72108093	A	G	456348	0.188733	-1.11171	6.12379	0.855944	-0.0296449	0.163297	0.855944	1	0.0336826170306864	518.321111111111
78	rs2027082	A	C	0.0152	0.0024	exposure	TRUE	2.3992045231164e-10	inferred	Rn5m8z	NA	textfile	1	183084608	C	A	456348	0.429773	2.06201	7.75959	0.790442	0.0342463	0.128873	0.790442	1	0.0093748890481711	40.1111111111111
79	rs204906	T	C	-0.0501	0.0067	exposure	TRUE	7.56852930468073e-14	inferred	Rn5m8z	NA	textfile	19	45461980	T	C	456348	0.0330592	0.616542	2.83863	0.828055	0.0765148	0.352283	0.828055	1	-0.0110685	55.9146803296948
80	rs2068888	A	G	-0.0292	0.0024	exposure	TRUE	4.67798715282527e-34	inferred	Rn5m8z	NA	textfile	10	94839642	A	G	456348	0.450258	0.361088	7.79645	0.96306	0.00594044	0.128264	0.96306	1	-0.0180075	148.027777777778
81	rs2081687	C	T	-0.0395	0.0025	exposure	TRUE	3.11116573790025e-56	inferred	Rn5m8z	NA	textfile	8	59388565	T	C	456348	0.337121	-4.10271	7.41962	0.580295	-0.074526	0.134778	0.580295	1	-0.0233825	249.64
82	rs2153271	T	C	-0.0149	0.0025	exposure	TRUE	2.52237933420219e-09	inferred	Rn5m8z	NA	textfile	9	16864521	C	T	456348	0.387369	-6.76213	7.6253	0.375186	-0.116297	0.131142	0.375186	1	-0.00882231	35.5216
83	rs2207132	A	G	0.1488	0.0067	exposure	TRUE	2.81405041475686e-109	inferred	Rn5m8z	NA	textfile	20	39142516	A	G	456348	0.033217	3.13512	2.75599	0.255302	0.41276	0.362846	0.255302	1	0.0328584013052698	493.237692136333
84	rs2235147	C	T	-0.0152	0.0026	exposure	TRUE	5.03068811238534e-09	inferred	Rn5m8z	NA	textfile	22	35664327	T	C	456348	0.302584	-16.0913	7.18461	0.0251107	-0.311735	0.139383	0.0253162	1	-0.0086538	34.1775147928994
85	rs2244608	G	A	0.0378	0.0026	exposure	TRUE	6.91288516295233e-48	inferred	Rn5m8z	NA	textfile	12	121416988	G	A	456348	0.317542	8.04183	7.29715	0.27044	0.151025	0.13704	0.27044	1	0.0215164577199338	211.366863905326
86	rs2255437	G	A	-0.0189	0.0024	exposure	TRUE	3.40742858326572e-15	inferred	Rn5m8z	NA	textfile	16	83988886	A	G	456348	0.472509	-1.98605	7.82986	0.799765	-0.0323953	0.127716	0.799765	1	-0.0116567	62.0156
87	rs2276516	G	A	0.017	0.003	exposure	TRUE	1.45602201478282e-08	inferred	Rn5m8z	NA	textfile	20	52567728	G	A	456348	0.196142	-14.3449	6.22162	0.02113	-0.370587	0.160834	0.0212139	1	0.00838813214022636	32.1111111111111
88	rs2278426	T	C	-0.0603	0.0061	exposure	TRUE	4.8239598956182e-23	inferred	Rn5m8z	NA	textfile	19	11350488	T	C	456348	0.0347027	-1.44961	2.85329	0.611419	-0.178057	0.350473	0.611419	1	-0.0146317	97.7180865358775
89	rs2287623	A	G	-0.0259	0.0024	exposure	TRUE	3.76891639984985e-27	inferred	Rn5m8z	NA	textfile	2	169830155	G	A	456348	0.396465	15.9979	7.6771	0.0371737	0.271437	0.130361	0.0373243	1	-0.015973	116.460069444444
90	rs2293767	A	G	-0.0191	0.0026	exposure	TRUE	2.03991568529116e-13	inferred	Rn5m8z	NA	textfile	7	100361675	A	G	456348	0.286611	7.76025	7.07328	0.272588	0.155108	0.141377	0.272588	1	-0.0108739	53.9659763313609
91	rs2304161	C	T	-0.0234	0.003	exposure	TRUE	6.1907175439174e-15	inferred	Rn5m8z	NA	textfile	19	10692117	C	T	456348	0.190492	-8.68781	6.1531	0.157967	-0.229468	0.16252	0.157967	1	-0.0115457	60.84
92	rs2395943	G	A	-0.0152	0.0024	exposure	TRUE	2.3992045231164e-10	inferred	Rn5m8z	NA	textfile	6	42940673	A	G	456348	0.4121	-1.24774	7.72695	0.871716	-0.0208982	0.129417	0.871716	1	-0.00937489	40.1111111111111
93	rs247617	A	C	-0.0464	0.0025	exposure	TRUE	6.77046569820674e-77	inferred	Rn5m8z	NA	textfile	16	56990716	A	C	456348	0.323821	-3.88548	7.3223	0.595671	-0.0724686	0.136569	0.595671	1	-0.0274642	344.474
94	rs2510072	G	A	0.0209	0.0038	exposure	TRUE	3.79791249317754e-08	inferred	Rn5m8z	NA	textfile	1	23769674	A	G	456348	0.111072	2.68391	4.9191	0.585334	0.110916	0.203289	0.585334	1	0.00814143897181763	30.25
95	rs2618566	T	G	-0.0335	0.0025	exposure	TRUE	6.04631547189034e-41	inferred	Rn5m8z	NA	textfile	20	17844684	G	T	456348	0.339012	3.4595	7.40419	0.640332	0.0631042	0.135059	0.640332	1	-0.0198323	179.56
96	rs2642438	G	A	0.0335	0.0026	exposure	TRUE	5.49487529674439e-38	inferred	Rn5m8z	NA	textfile	1	220970028	A	G	456348	0.297399	-5.53233	7.17984	0.440981	-0.10732	0.139279	0.440981	1	0.0190697655505257	166.013313609467
97	rs267733	G	A	-0.0223	0.0033	exposure	TRUE	1.40319678076878e-11	inferred	Rn5m8z	NA	textfile	1	150958836	G	A	456348	0.161219	7.3671	5.76196	0.201047	0.221899	0.173552	0.201047	1	-0.0100028	45.6648301193756
98	rs2706379	T	C	-0.0188	0.003	exposure	TRUE	3.68858563638787e-10	inferred	Rn5m8z	NA	textfile	5	131805735	T	C	456348	0.186753	3.47403	6.08345	0.567957	0.0938716	0.16438	0.567957	1	-0.00927622	39.2711111111111
99	rs2710642	A	G	0.0269	0.0025	exposure	TRUE	5.31701665854024e-27	inferred	Rn5m8z	NA	textfile	2	63149557	G	A	456348	0.326658	9.20892	7.3335	0.209212	0.171233	0.136361	0.209212	1	0.0159261228973839	115.778
100	rs2758886	A	G	0.0181	0.0026	exposure	TRUE	3.36576638755557e-12	inferred	Rn5m8z	NA	textfile	6	39250837	A	G	456348	0.298117	5.49207	7.17837	0.444221	0.106582	0.139307	0.444221	1	0.0103046926617432	48.4630177514793
101	rs278981	C	T	0.0151	0.0027	exposure	TRUE	2.23703784319785e-08	inferred	Rn5m8z	NA	textfile	4	40428010	T	C	456348	0.242285	5.79105	6.8247	0.396135	0.124334	0.146527	0.396135	1	0.00827849091844718	31.2770919067215
102	rs2792751	C	T	-0.0253	0.0027	exposure	TRUE	7.22784491232443e-21	inferred	Rn5m8z	NA	textfile	10	113940329	T	C	456348	0.27424	3.28183	6.96681	0.637593	0.0676159	0.143538	0.637593	1	-0.0138697	87.803840877915
103	rs2823146	G	A	-0.0512	0.0085	exposure	TRUE	1.70654080909111e-09	inferred	Rn5m8z	NA	textfile	21	16583736	G	A	456348	0.0188299	-1.5669	2.11505	0.458792	-0.35027	0.472803	0.458792	1	-0.00891634	36.2829065743945
104	rs28385651	C	T	0.0422	0.0064	exposure	TRUE	4.28853635632051e-11	inferred	Rn5m8z	NA	textfile	1	27696330	C	T	456348	0.0375108	-0.220898	2.97747	0.940859	-0.0249171	0.335856	0.940859	1	0.00976033368600535	43.4775
105	rs2844480	T	C	0.0267	0.003	exposure	TRUE	5.58466874987929e-19	inferred	Rn5m8z	NA	textfile	6	31564821	T	C	456348	0.197109	-6.18694	6.20628	0.318821	-0.160625	0.161127	0.318821	1	0.0131736219045405	79.21
106	rs2877660	G	A	0.0268	0.0035	exposure	TRUE	1.90115120479499e-14	inferred	Rn5m8z	NA	textfile	14	70850012	A	G	456348	0.139416	2.9151	5.40446	0.58962	0.099804	0.185032	0.58962	1	0.0113342223466956	58.6318367346939
107	rs2904239	A	G	-0.0159	0.0027	exposure	TRUE	3.88800725728803e-09	inferred	Rn5m8z	NA	textfile	19	57079948	G	A	456348	0.26413	0.551076	6.92376	0.936562	0.0114955	0.14443	0.936562	1	-0.00871705	34.679012345679
108	rs2928619	T	C	0.0141	0.0025	exposure	TRUE	1.70050164309501e-08	inferred	Rn5m8z	NA	textfile	8	6569927	C	T	456348	0.346934	4.57411	7.44408	0.53891	0.0825438	0.134335	0.53891	1	0.00834866133503047	31.8096
109	rs3184504	C	T	0.0238	0.0024	exposure	TRUE	3.5232634829835e-23	inferred	Rn5m8z	NA	textfile	12	111884608	T	C	456348	0.482616	-4.3541	7.84261	0.578768	-0.0707909	0.127509	0.578768	1	0.0146781662431217	98.3402777777778
110	rs34579698	A	G	0.0153	0.0025	exposure	TRUE	9.35753574836327e-10	inferred	Rn5m8z	NA	textfile	3	69875659	G	A	456348	0.352803	-1.00723	7.48456	0.892949	-0.0179802	0.133608	0.892949	1	0.00905912967931596	37.4544
111	rs35350976	G	A	0.0181	0.0031	exposure	TRUE	5.26066470879236e-09	inferred	Rn5m8z	NA	textfile	19	59023174	G	A	456348	0.180816	11.7216	6.0107	0.0511618	0.324441	0.16637	0.0511618	1	0.0086427815458248	34.0905306971904
112	rs35468353	G	A	0.0168	0.0025	exposure	TRUE	1.81724561611307e-11	inferred	Rn5m8z	NA	textfile	16	31056433	G	A	456348	0.377263	-9.37411	7.61036	0.21804	-0.161853	0.1314	0.21804	1	0.00994719569120409	45.1584
113	rs35882350	G	A	0.0206	0.0027	exposure	TRUE	2.3542909622004e-14	inferred	Rn5m8z	NA	textfile	12	623129	G	A	456348	0.261633	-3.41179	6.8846	0.620199	-0.0719821	0.145252	0.620199	1	0.0112935020416127	58.2112482853223
114	rs35939242	C	A	-0.0234	0.0025	exposure	TRUE	7.97366922263196e-21	inferred	Rn5m8z	NA	textfile	3	12301893	C	A	456348	0.340363	6.12401	7.43127	0.409891	0.110894	0.134566	0.409891	1	-0.0138544	87.6096
115	rs3738621	G	A	-0.0223	0.0029	exposure	TRUE	1.47532106061428e-14	inferred	Rn5m8z	NA	textfile	1	235110784	G	A	456348	0.212708	6.27177	6.42414	0.328925	0.151971	0.155663	0.328925	1	-0.0113823	59.1307966706302
116	rs37530	C	A	-0.0131	0.0024	exposure	TRUE	4.80624718884242e-08	inferred	Rn5m8z	NA	textfile	5	57570622	A	C	456348	0.472628	-4.33286	7.81539	0.579304	-0.0709371	0.127953	0.579304	1	-0.00807976	29.7934027777778
117	rs3756772	T	C	0.0228	0.0024	exposure	TRUE	2.09890301507249e-21	inferred	Rn5m8z	NA	textfile	6	116325142	T	C	456348	0.401822	-3.25858	7.6818	0.671424	-0.0552208	0.130178	0.671424	1	0.014061561187127	90.25
118	rs4148810	T	C	-0.02	0.0031	exposure	TRUE	1.10665957074827e-10	inferred	Rn5m8z	NA	textfile	7	87102251	T	C	456348	0.180842	1.95117	6.0584	0.747407	0.0531593	0.16506	0.747407	1	-0.00954996	41.6233090530697
119	rs4149310	T	A	0.0316	0.0033	exposure	TRUE	1.01113265578413e-21	inferred	Rn5m8z	NA	textfile	9	107589134	T	A	456348	0.155903	0.646131	5.69364	0.909648	0.0199315	0.175635	0.909648	1	0.0141736724111314	91.6951331496786
120	rs4245791	T	C	-0.0774	0.0025	exposure	TRUE	1.86365863026682e-210	inferred	Rn5m8z	NA	textfile	2	44074431	C	T	456348	0.32509	-4.16696	7.34719	0.570612	-0.0771928	0.136106	0.570612	1	-0.0457824	958.522
121	rs4302748	A	G	0.0218	0.003	exposure	TRUE	3.68466529144982e-13	inferred	Rn5m8z	NA	textfile	7	36191699	A	G	456348	0.187701	-2.65117	6.10293	0.663991	-0.0711805	0.163856	0.663991	1	0.0107563020648431	52.8044444444444
122	rs4310184	C	T	-0.0162	0.0028	exposure	TRUE	7.22048502269004e-09	inferred	Rn5m8z	NA	textfile	8	87245253	C	T	456348	0.229298	-5.27657	6.59003	0.423311	-0.1215	0.151744	0.423311	1	-0.00856434	33.4744897959184
123	rs4530754	A	G	0.0233	0.0024	exposure	TRUE	2.77842951158033e-22	inferred	Rn5m8z	NA	textfile	5	122855416	G	A	456348	0.455982	-0.560853	7.80681	0.942728	-0.00920241	0.128093	0.942728	1	0.0143698657643407	94.2517361111111
124	rs471705	G	T	0.0545	0.0025	exposure	TRUE	2.32016939450883e-105	inferred	Rn5m8z	NA	textfile	1	55521242	T	G	456348	0.359996	8.48994	7.5095	0.25824	0.150551	0.133165	0.25824	1	0.0322539827573664	475.24
125	rs4731702	T	C	-0.0182	0.0024	exposure	TRUE	3.36788097231433e-14	inferred	Rn5m8z	NA	textfile	7	130433384	T	C	456348	0.494003	22.4933	7.8456	0.0041438	0.365428	0.127819	0.00425031	1	-0.011225	57.5069444444445
126	rs4751996	G	A	0.0158	0.0024	exposure	TRUE	4.60016207200234e-11	inferred	Rn5m8z	NA	textfile	10	118397894	A	G	456348	0.480529	12.5213	7.82145	0.1094	0.20468	0.127854	0.1094	1	0.00974491598287986	43.3402777777778
127	rs4765127	T	G	-0.0163	0.0025	exposure	TRUE	7.03073914790349e-11	inferred	Rn5m8z	NA	textfile	12	124460167	T	G	456348	0.334342	5.96778	7.40096	0.42004	0.108952	0.135118	0.42004	1	-0.00965118	42.5104
128	rs4788815	T	A	0.0257	0.0025	exposure	TRUE	8.67276015674344e-25	inferred	Rn5m8z	NA	textfile	16	71634811	A	T	456348	0.343246	-7.76598	7.43525	0.296263	-0.140477	0.134494	0.296263	1	0.0152158322091686	105.678
129	rs4850047	C	T	-0.0238	0.0035	exposure	TRUE	1.04619150882891e-11	inferred	Rn5m8z	NA	textfile	2	3634753	T	C	456348	0.13116	7.89512	5.28674	0.135337	0.282477	0.189153	0.135337	1	-0.0100656	46.24
130	rs4942486	C	T	-0.0255	0.0024	exposure	TRUE	2.28012169256078e-26	inferred	Rn5m8z	NA	textfile	13	32953388	T	C	456348	0.476074	0.80695	7.83109	0.917928	0.0131584	0.127696	0.917928	1	-0.0157264	112.891
131	rs505151	A	G	-0.0974	0.0065	exposure	TRUE	9.25598341722008e-51	inferred	Rn5m8z	NA	textfile	1	55529187	G	A	456348	0.0320041	0.192766	2.75018	0.94412	0.0254863	0.363612	0.94412	1	-0.0221764	224.538698224852
132	rs526936	A	G	0.0454	0.0024	exposure	TRUE	8.31497866817414e-80	inferred	Rn5m8z	NA	textfile	1	234852204	G	A	456348	0.48185	1.78767	7.82877	0.819377	0.0291676	0.127734	0.819377	1	0.0279915713803856	357.840277777778
133	rs55669835	G	A	0.027	0.0028	exposure	TRUE	5.2700335472374e-22	inferred	Rn5m8z	NA	textfile	2	203525968	G	A	456348	0.248201	-16.2029	6.76878	0.0166763	-0.353648	0.147869	0.0167737	1	0.014272970477553	92.984693877551
134	rs55714927	T	C	-0.0434	0.0031	exposure	TRUE	1.55870736383856e-44	inferred	Rn5m8z	NA	textfile	17	7080316	T	C	456348	0.191179	2.68905	6.17661	0.663301	0.0704854	0.161901	0.663301	1	-0.0207199	196
135	rs55784804	T	G	0.0248	0.004	exposure	TRUE	5.64631607408658e-10	inferred	Rn5m8z	NA	textfile	17	7536460	T	G	456348	0.100809	2.46432	4.69191	0.599425	0.111943	0.213133	0.599425	1	0.00917753976527931	38.44
136	rs55791371	C	A	-0.2409	0.0037	exposure	TRUE	0	inferred	Rn5m8z	NA	textfile	19	11188153	C	A	456348	0.118105	9.07734	5.04988	0.0722504	0.355956	0.198025	0.0722504	1	-0.0959357	4239.06574141709
137	rs58542926	T	C	-0.1453	0.0045	exposure	TRUE	1.00175850418791e-228	inferred	Rn5m8z	NA	textfile	19	19379549	T	C	456348	0.0749669	19.5603	4.12442	2.11045e-06	1.14987	0.265501	1.48474e-05	1	-0.0477431	1042.57234567901
138	rs603424	A	G	0.0235	0.0031	exposure	TRUE	3.43840813405495e-14	inferred	Rn5m8z	NA	textfile	10	102075479	A	G	456348	0.170534	-2.09252	5.85554	0.720824	-0.0610289	0.170778	0.720824	1	0.0112210035927589	57.4661810613944
139	rs6065347	C	T	0.0217	0.0029	exposure	TRUE	7.27784825800993e-14	inferred	Rn5m8z	NA	textfile	20	40021959	C	T	456348	0.219049	-7.82116	6.47175	0.226852	-0.186736	0.154518	0.226852	1	0.0110761281146757	55.9916765755054
140	rs61754230	T	C	0.0639	0.0087	exposure	TRUE	2.0602450162426e-13	inferred	Rn5m8z	NA	textfile	12	72179446	T	C	456348	0.0197744	0.201316	2.17038	0.926098	0.0427371	0.460748	0.926098	1	0.0108719842137648	53.9464922711058
141	rs62120566	G	C	-0.3203	0.0077	exposure	TRUE	0	inferred	Rn5m8z	NA	textfile	19	45197732	G	C	456348	0.0249492	-2.299	2.47174	0.352312	-0.3763	0.404574	0.352312	1	-0.0614607	1730.3439028504
142	rs631408	C	T	0.0162	0.0025	exposure	TRUE	9.17226183534502e-11	inferred	Rn5m8z	NA	textfile	8	61541273	C	T	456348	0.37804	-9.97664	7.57724	0.187953	-0.173765	0.131974	0.187953	1	0.00959197199321488	41.9904
143	rs635634	T	C	0.0833	0.0031	exposure	TRUE	4.79876271357115e-159	inferred	Rn5m8z	NA	textfile	9	136155000	T	C	456348	0.184394	-2.23305	6.0126	0.710344	-0.0617693	0.166317	0.710344	1	0.0397459494591558	722.048907388137
144	rs6495122	C	A	0.0149	0.0024	exposure	TRUE	5.35494734371043e-10	inferred	Rn5m8z	NA	textfile	15	75125645	A	C	456348	0.406669	3.37681	7.69319	0.660709	0.0570549	0.129985	0.660709	1	0.00918987412711727	38.5434027777778
145	rs6504487	A	C	0.0135	0.0024	exposure	TRUE	1.85507974691217e-08	inferred	Rn5m8z	NA	textfile	17	65123352	A	C	456348	0.478906	-2.41884	7.83467	0.757523	-0.0394063	0.127638	0.757523	1	0.00832645898994717	31.6406
146	rs6560501	G	A	-0.0136	0.0024	exposure	TRUE	1.45602201478282e-08	inferred	Rn5m8z	NA	textfile	9	78743863	A	G	456348	0.468528	21.1784	7.82241	0.00678113	0.346109	0.128124	0.00690554	1	-0.00838813	32.1111111111111
147	rs66777321	A	G	-0.0207	0.0034	exposure	TRUE	1.14162010542425e-09	inferred	Rn5m8z	NA	textfile	17	27692362	A	G	456348	0.143351	7.93463	5.47471	0.147247	0.264731	0.182658	0.147247	1	-0.00901211	37.0666089965398
148	rs6785233	G	T	0.0268	0.0043	exposure	TRUE	4.58879146991083e-10	inferred	Rn5m8z	NA	textfile	3	170756985	G	T	456348	0.078931	0.922071	4.19093	0.825859	0.0524981	0.238611	0.825859	1	0.00922572980629364	38.8447809626825
149	rs680379	G	A	0.0155	0.0024	exposure	TRUE	1.0586236402998e-10	inferred	Rn5m8z	NA	textfile	20	12969400	A	G	456348	0.393208	-0.86732	7.65972	0.909847	-0.0147827	0.130553	0.909847	1	0.00955990300642331	41.7100694444445
150	rs6831256	G	A	0.0209	0.0024	exposure	TRUE	3.08375336816747e-18	inferred	Rn5m8z	NA	textfile	4	3473139	G	A	456348	0.422248	-3.82931	7.73996	0.620779	-0.063921	0.1292	0.620779	1	0.0128899679652482	75.8350694444445
151	rs6882076	C	T	0.0471	0.0025	exposure	TRUE	3.54965694865272e-79	inferred	Rn5m8z	NA	textfile	5	156390297	T	C	456348	0.365139	-4.79953	7.54389	0.524636	-0.0843351	0.132558	0.524636	1	0.0278782137131291	354.946
152	rs693	A	G	0.1053	0.0024	exposure	TRUE	0	inferred	Rn5m8z	NA	textfile	2	21232195	G	A	456348	0.47678	8.26054	7.82735	0.291268	0.134828	0.127757	0.291268	1	0.0648120762668341	1925.02
153	rs6982502	T	C	-0.0795	0.0024	exposure	TRUE	1.29773559076048e-240	inferred	Rn5m8z	NA	textfile	8	126479362	C	T	456348	0.479894	18.8443	7.83103	0.0161123	0.307285	0.127909	0.0162888	1	-0.0489764	1097.27
154	rs7013120	A	G	-0.0183	0.0026	exposure	TRUE	1.9437393748456e-12	inferred	Rn5m8z	NA	textfile	8	74881674	A	G	456348	0.302563	-5.22935	7.23348	0.469718	-0.0999434	0.138246	0.469718	1	-0.0104185	49.5399408284024
155	rs704	A	G	0.0213	0.0024	exposure	TRUE	6.9933413964278e-19	inferred	Rn5m8z	NA	textfile	17	26694861	A	G	456348	0.475313	1.55405	7.8381	0.842835	0.0252955	0.127582	0.842835	1	0.0131366237435305	78.7656
156	rs7124487	T	C	-0.0176	0.003	exposure	TRUE	4.44643300050304e-09	inferred	Rn5m8z	NA	textfile	11	2988323	T	C	456348	0.203157	16.7182	6.27808	0.00774588	0.424167	0.159633	0.00788062	1	-0.00868416	34.4177777777778
157	rs7132502	A	G	-0.0144	0.0025	exposure	TRUE	8.41139360904405e-09	inferred	Rn5m8z	NA	textfile	12	100832218	A	G	456348	0.387528	-7.13696	7.61596	0.348704	-0.123045	0.131303	0.348704	1	-0.00852628	33.1776
158	rs71336078	A	G	-0.0219	0.0034	exposure	TRUE	1.18550932665076e-10	inferred	Rn5m8z	NA	textfile	3	136489602	A	G	456348	0.150026	-13.0058	5.61012	0.0204346	-0.41323	0.178381	0.0205277	1	-0.00953451	41.4887543252595
159	rs7157785	T	G	0.0218	0.0032	exposure	TRUE	9.59170562811796e-12	inferred	Rn5m8z	NA	textfile	14	64235556	T	G	456348	0.160152	1.75175	5.72623	0.759668	0.0534238	0.174635	0.759668	1	0.0100841038267423	46.4102
160	rs7178424	T	C	0.0138	0.0024	exposure	TRUE	8.92434490780322e-09	inferred	Rn5m8z	NA	textfile	15	62380259	T	C	456348	0.448556	-9.49998	7.79713	0.223074	-0.156262	0.128252	0.223074	1	0.00851147815291719	33.0625
161	rs7187399	T	C	0.0142	0.0025	exposure	TRUE	1.3469474203115e-08	inferred	Rn5m8z	NA	textfile	16	11688159	T	C	456348	0.329237	1.96548	7.36005	0.789433	0.0362834	0.135869	0.789433	1	0.00840786752813304	32.2624
162	rs7240405	G	A	0.024	0.0031	exposure	TRUE	9.79146744902738e-15	inferred	Rn5m8z	NA	textfile	18	47159090	A	G	456348	0.177753	2.64151	6.02232	0.660937	0.0728325	0.166049	0.660937	1	0.0114597173234211	59.9375650364204
163	rs72631343	G	C	-0.0424	0.0036	exposure	TRUE	5.0815125840856e-32	inferred	Rn5m8z	NA	textfile	17	67191270	G	C	456348	0.128433	3.44548	5.24015	0.510849	0.125477	0.190834	0.510849	1	-0.0174321	138.716049382716
164	rs7263640	T	C	-0.0284	0.0039	exposure	TRUE	3.28782037806988e-13	inferred	Rn5m8z	NA	textfile	20	34314725	T	C	456348	0.100648	-0.539222	4.69229	0.908511	-0.0244905	0.213116	0.908511	1	-0.0107791	53.0282708744247
165	rs72654472	T	G	-0.0684	0.0075	exposure	TRUE	7.5124329800961e-20	inferred	Rn5m8z	NA	textfile	19	45414392	T	G	456348	0.026975	-3.56307	2.52674	0.158497	-0.558088	0.395767	0.158497	1	-0.0134992	83.1744
166	rs7267979	G	A	-0.0135	0.0024	exposure	TRUE	1.85507974691217e-08	inferred	Rn5m8z	NA	textfile	20	25298087	A	G	456348	0.44048	4.05041	7.78362	0.602801	0.0668554	0.128475	0.602801	1	-0.00832646	31.6406
167	rs72729610	G	A	-0.0193	0.0032	exposure	TRUE	1.62696266747067e-09	inferred	Rn5m8z	NA	textfile	4	154190965	G	A	456348	0.166405	3.78557	5.85078	0.517619	0.110587	0.170917	0.517619	1	-0.00892777	36.376
168	rs72902579	C	T	-0.1073	0.0058	exposure	TRUE	2.06473973791252e-76	inferred	Rn5m8z	NA	textfile	2	21276008	C	T	456348	0.0435041	-4.89951	3.22813	0.129076	-0.470166	0.309777	0.129076	1	-0.0273755	342.25
169	rs72961013	A	G	0.0291	0.0049	exposure	TRUE	2.87158754842397e-09	inferred	Rn5m8z	NA	textfile	6	127529780	A	G	456348	0.0661074	0.919851	3.87523	0.812372	0.0612524	0.258049	0.812372	1	0.00879089318496272	35.2690545605998
170	rs73545584	C	A	-0.0243	0.0037	exposure	TRUE	5.11438074442633e-11	inferred	Rn5m8z	NA	textfile	8	21932731	C	A	456348	0.118112	-4.58571	5.1083	0.369347	-0.175733	0.19576	0.369347	1	-0.00972158	43.1329437545654
171	rs73596816	A	G	0.0539	0.0065	exposure	TRUE	1.11072155633345e-16	inferred	Rn5m8z	NA	textfile	6	161017363	A	G	456348	0.0334788	-5.24403	2.81959	0.062906	-0.659618	0.354661	0.062906	1	0.0122742670260557	68.7623668639053
172	rs73936968	A	G	0.0569	0.0078	exposure	TRUE	2.98943602228999e-13	inferred	Rn5m8z	NA	textfile	19	45395816	A	G	456348	0.0229715	-2.56994	2.32891	0.269812	-0.473826	0.429386	0.269812	1	0.010798047143744	53.215154503616
173	rs74543191	A	G	0.0312	0.0056	exposure	TRUE	2.52658950432665e-08	inferred	Rn5m8z	NA	textfile	8	55509119	A	G	456348	0.0499816	1.39972	3.45225	0.685145	0.117446	0.289666	0.685145	1	0.0082471648000688	31.0408163265306
174	rs7528419	G	A	-0.1682	0.0029	exposure	TRUE	0	inferred	Rn5m8z	NA	textfile	1	109817192	G	A	456348	0.222645	9.9666	6.52878	0.126869	0.233821	0.153168	0.126869	1	-0.0855433	3364
175	rs7570971	A	C	0.0183	0.0027	exposure	TRUE	1.2203836324607e-11	inferred	Rn5m8z	NA	textfile	2	135837906	A	C	456348	0.276237	-1.04945	6.96808	0.880285	-0.021614	0.143511	0.880285	1	0.0100327119500426	45.9382716049383
176	rs76272805	A	G	-0.0456	0.0055	exposure	TRUE	1.12386158945313e-16	inferred	Rn5m8z	NA	textfile	1	63105425	A	G	456348	0.0511912	2.73783	3.40883	0.421883	0.235611	0.293356	0.421883	1	-0.0122722	68.739173553719
177	rs7631792	T	C	-0.0144	0.0024	exposure	TRUE	1.9731752900754e-09	inferred	Rn5m8z	NA	textfile	3	160148756	C	T	456348	0.471551	-7.07924	7.81575	0.36506	-0.11589	0.127947	0.36506	1	-0.00888151	36
178	rs7640978	T	C	-0.0405	0.0041	exposure	TRUE	5.18323140166977e-23	inferred	Rn5m8z	NA	textfile	3	32533010	T	C	456348	0.0890395	4.17952	4.45503	0.348164	0.210584	0.224465	0.348164	1	-0.014621	97.5758477096966
179	rs7644234	T	G	0.018	0.0025	exposure	TRUE	6.02125596223491e-13	inferred	Rn5m8z	NA	textfile	3	119691611	T	G	456348	0.37164	-0.884579	7.57606	0.90705	-0.0154117	0.131995	0.90705	1	0.0106576316551786	51.84
180	rs76560105	T	G	-0.2848	0.0066	exposure	TRUE	0	inferred	Rn5m8z	NA	textfile	19	45299199	T	G	456348	0.0341472	2.79272	2.81145	0.320546	0.353318	0.355688	0.320546	1	-0.0637477	1862.05325987144
181	rs76786359	G	A	0.0537	0.008	exposure	TRUE	1.91317804091633e-11	inferred	Rn5m8z	NA	textfile	10	52380642	G	A	456348	0.0237571	-1.79526	2.37083	0.448914	-0.319393	0.421792	0.448914	1	0.00993609500694522	45.0577
182	rs77196615	C	T	0.0552	0.0095	exposure	TRUE	6.22767420169737e-09	inferred	Rn5m8z	NA	textfile	19	45380335	C	T	456348	0.0164348	-2.04108	1.99302	0.30578	-0.513852	0.501752	0.30578	1	0.00860106606625592	33.762216066482
183	rs77239910	A	G	-0.0176	0.0032	exposure	TRUE	3.79791249317754e-08	inferred	Rn5m8z	NA	textfile	11	66329639	A	G	456348	0.17446	2.90812	5.95508	0.625307	0.0820044	0.167924	0.625307	1	-0.00814144	30.25
184	rs77400396	A	G	-0.0478	0.0073	exposure	TRUE	5.83341131457513e-11	inferred	Rn5m8z	NA	textfile	8	28901692	A	G	456348	0.0282076	-0.916292	2.58921	0.723423	-0.136678	0.386218	0.723423	1	-0.00969254	42.8755864139614
185	rs7752556	A	G	0.0159	0.0027	exposure	TRUE	3.88800725728803e-09	inferred	Rn5m8z	NA	textfile	6	53495694	A	G	456348	0.265237	-12.4713	6.93234	0.0720182	-0.259509	0.144251	0.0720182	1	0.00871705397459147	34.679012345679
186	rs77542162	G	A	0.1859	0.0083	exposure	TRUE	4.15449140207559e-111	inferred	Rn5m8z	NA	textfile	17	67081278	G	A	456348	0.0228028	-0.769438	2.36909	0.745346	-0.137091	0.422102	0.745346	1	0.0331371839624499	501.652053999129
187	rs77704739	C	T	-0.0596	0.006	exposure	TRUE	2.9811950411296e-23	inferred	Rn5m8z	NA	textfile	5	52080909	C	T	456348	0.0421564	5.35855	3.17791	0.0917595	0.530597	0.314672	0.0917595	1	-0.0147028	98.6711111111111
188	rs77960347	G	A	0.0941	0.0104	exposure	TRUE	1.45508255472579e-19	inferred	Rn5m8z	NA	textfile	18	47109955	G	A	456348	0.0133911	0.727256	1.79677	0.685656	0.225269	0.556553	0.685656	1	0.0133927637437321	81.8676960059172
189	rs78173576	G	T	-0.0407	0.0064	exposure	TRUE	2.02576303404561e-10	inferred	Rn5m8z	NA	textfile	17	7217099	G	T	456348	0.036218	-3.91954	2.93016	0.181009	-0.456513	0.341279	0.181009	1	-0.00941343	40.441650390625
190	rs78946096	G	A	-0.0457	0.0052	exposure	TRUE	1.51621926985896e-18	inferred	Rn5m8z	NA	textfile	3	132188163	G	A	456348	0.0578714	2.8615	3.64381	0.432275	0.215518	0.274438	0.432275	1	-0.0130086	77.2370562130178
191	rs7913418	G	A	-0.0146	0.0025	exposure	TRUE	5.22008222402583e-09	inferred	Rn5m8z	NA	textfile	10	97808509	G	A	456348	0.359173	3.65989	7.52445	0.626684	0.0646425	0.1329	0.626684	1	-0.00864469	34.1056
192	rs79429216	A	G	0.119	0.0105	exposure	TRUE	8.9723850107363e-30	inferred	Rn5m8z	NA	textfile	19	45445517	A	G	456348	0.0123524	2.93803	1.73814	0.0909654	0.97249	0.575326	0.0909654	1	0.0167744939746307	128.444444444444
193	rs7991128	G	T	0.0161	0.0028	exposure	TRUE	8.92434490780322e-09	inferred	Rn5m8z	NA	textfile	13	51067234	G	T	456348	0.243214	-3.92005	6.72455	0.55993	-0.0866892	0.148709	0.55993	1	0.00851147815291719	33.0625
194	rs799157	C	T	-0.0489	0.0059	exposure	TRUE	1.15037394142111e-16	inferred	Rn5m8z	NA	textfile	7	73020301	T	C	456348	0.04348	-0.666342	3.18571	0.834319	-0.0656575	0.313902	0.834319	1	-0.0122681	68.6931916116059
195	rs8017377	A	G	0.0225	0.0024	exposure	TRUE	6.91757697446716e-21	inferred	Rn5m8z	NA	textfile	14	24883887	A	G	456348	0.474532	-3.20437	7.82644	0.682225	-0.0523135	0.127772	0.682225	1	0.013876576510101	87.8906
196	rs80215559	C	T	-0.0654	0.0046	exposure	TRUE	7.1467789312174e-46	inferred	Rn5m8z	NA	textfile	6	25918225	C	T	456348	0.0763694	23.3717	4.25193	3.86904e-08	1.29276	0.262478	8.42616e-07	1	-0.0210415	202.134215500945
197	rs8082188	T	C	0.017	0.0026	exposure	TRUE	6.21548643321079e-11	inferred	Rn5m8z	NA	textfile	17	40398825	T	C	456348	0.307124	3.31553	7.22631	0.646368	0.0634922	0.138383	0.646368	1	0.0096785011824112	42.7514792899408
198	rs8121509	C	T	-0.0144	0.0024	exposure	TRUE	1.9731752900754e-09	inferred	Rn5m8z	NA	textfile	20	62712053	C	T	456348	0.452728	1.5502	7.80081	0.842479	0.0254746	0.128192	0.842479	1	-0.00888151	36
199	rs9289193	A	T	0.0164	0.0024	exposure	TRUE	8.29638731487263e-12	inferred	Rn5m8z	NA	textfile	3	122134889	T	A	456348	0.417099	2.11401	7.739	0.784727	0.0352971	0.129216	0.784727	1	0.0101149389144322	46.6944444444445
200	rs9370867	G	A	-0.0277	0.0024	exposure	TRUE	8.13338439912399e-31	inferred	Rn5m8z	NA	textfile	6	16145325	G	A	456348	0.46237	-2.10331	7.82515	0.788092	-0.0343494	0.127793	0.788092	1	-0.0170828	133.210069444444
201	rs9376090	C	T	-0.0246	0.0027	exposure	TRUE	8.15425194119556e-20	inferred	Rn5m8z	NA	textfile	6	135411228	C	T	456348	0.259	10.3415	6.8621	0.131799	0.219619	0.145728	0.131799	1	-0.013486	83.0123456790123
202	rs9577924	G	A	0.0311	0.0027	exposure	TRUE	1.06425053064782e-30	inferred	Rn5m8z	NA	textfile	13	114545317	G	A	456348	0.260805	-11.0199	6.89546	0.110014	-0.231766	0.145023	0.110014	1	0.0170485079880602	132.676268861454
203	rs964184	C	G	-0.0976	0.0035	exposure	TRUE	3.97622363703462e-171	inferred	Rn5m8z	NA	textfile	11	116648917	G	C	456348	0.132915	-2.63721	5.31787	0.619954	-0.0932545	0.188045	0.619954	1	-0.0412444	777.61306122449
204	rs976002	G	A	0.0313	0.0028	exposure	TRUE	5.19189968688456e-29	inferred	Rn5m8z	NA	textfile	4	69343287	G	A	456348	0.24637	1.42966	6.7498	0.832257	0.0313799	0.148153	0.832257	1	0.0165454936473366	124.960459183674
205	rs9987289	G	A	0.0628	0.0041	exposure	TRUE	5.88065038866014e-53	inferred	Rn5m8z	NA	textfile	8	9183358	A	G	456348	0.0914631	-1.31535	4.49639	0.769878	-0.0650598	0.2224	0.769878	1	0.0226682009388181	234.612730517549
F-statistic was calculated using the following formulas: F=R^2 (n-2)⁄(1-R^2) and R^2=2×MAF×(1-MAF)×β^2, where F represents F-statistic, R^2 represents the phenotypic variance explained by a genetic instrument, N is the sample size, β is the estimated genetic association of SNP with the exposure, MAF is the minor allele frequency. SNP: single nucleotide polymorphisms.

## Sheet: S3
Tab S3. Characteristics of GWAS-identified Platelet count-associated genetic instruments.
	SNP	effect_allele.exposure	other_allele.exposure	eaf.exposure	beta.exposure	se.exposure	exposure	mr_keep.exposure	pval.exposure	pval_origin.exposure	id.exposure	data_source.exposure	chromosome	base_pair_location	effect_allele	other_allele	N	effect_allele_frequency	T	SE_T	P_noSPA	beta	standard_error	p_value	CONVERGE	R	F
1	rs10035307	C	T	0.616381	-0.016796	0.00192573	exposure	TRUE	2.73602618156382e-18	inferred	R29r7e	textfile	5	90201999	T	C	450769	0.382795	2.50443	7.5667	0.740659	0.0437418	0.132158	0.740659	1	-0.0129897	76.0713178000789
2	rs10040653	C	T	0.916089	0.0301593	0.00336704	exposure	TRUE	3.32983083210537e-19	inferred	R29r7e	textfile	5	158229824	T	C	456043	0.0836928	4.53549	4.33296	0.295219	0.241577	0.230789	0.295219	1	0.013262727217387	80.2316942056431
3	rs10045403	A	G	0.727618	0.0162285	0.00210205	exposure	TRUE	1.16037430834587e-14	inferred	R29r7e	textfile	5	96147733	G	A	454291	0.272723	3.2303	6.98461	0.643732	0.0662153	0.143172	0.643732	1	0.0114535664307607	59.6033507747727
4	rs10047928	G	A	0.745641	0.0204141	0.00215651	exposure	TRUE	2.90022711618286e-21	inferred	R29r7e	textfile	14	31368063	A	G	456348	0.254354	-12.5796	6.82199	0.065187	-0.270298	0.146585	0.065187	1	0.0140116410023821	89.6102157599409
5	rs10048745	G	A	0.744159	-0.01979	0.00215581	exposure	TRUE	4.31715454205959e-20	inferred	R29r7e	textfile	2	68962137	A	G	440846	0.2524	-1.27034	6.70507	0.849732	-0.0282562	0.149141	0.849732	1	-0.0138246	84.2695401766881
6	rs10062757	T	C	0.586155	-0.0193313	0.0018992	exposure	TRUE	2.46953085964968e-24	inferred	R29r7e	textfile	5	61535124	C	T	453834	0.41391	22.14	7.69615	0.00401782	0.373792	0.130414	0.00415423	1	-0.0151075	103.60500071606
7	rs10077115	A	G	0.898319	0.0183486	0.00310518	exposure	TRUE	3.44129228871032e-09	inferred	R29r7e	textfile	5	76914963	G	A	454124	0.100713	12.3304	4.69706	0.00866145	0.558889	0.21386	0.0089662	1	0.00876825530196786	34.9166287838738
8	rs1008084	G	A	0.543789	-0.0226854	0.00186978	exposure	TRUE	7.09104353790612e-34	inferred	R29r7e	textfile	6	109626965	A	G	454895	0.456723	-12.7098	7.78728	0.102654	-0.209588	0.128415	0.102654	1	-0.0179859	147.20137359537
9	rs10139354	C	T	0.664693	-0.0123962	0.00201001	exposure	TRUE	6.94953193969531e-10	inferred	R29r7e	textfile	14	55478602	T	C	441206	0.332291	6.18142	7.2587	0.394443	0.11732	0.137766	0.394443	1	-0.00928436	38.0347628619909
10	rs10150967	G	C	0.534212	0.0114895	0.00188569	exposure	TRUE	1.10817430006636e-09	inferred	R29r7e	textfile	14	39757457	C	G	454600	0.46714	15.1676	7.81543	0.0522925	0.248319	0.127952	0.0522925	1	0.00903648097560766	37.1245897402195
11	rs10220411	A	G	0.738062	-0.0297415	0.00213779	exposure	TRUE	5.33627691265852e-44	inferred	R29r7e	textfile	14	69452088	G	A	456348	0.261961	0.655614	6.87472	0.924024	0.013872	0.14546	0.924024	1	-0.0205901	193.551104488205
12	rs1038419	C	A	0.661109	-0.0190274	0.00198463	exposure	TRUE	9.03509905730817e-22	inferred	R29r7e	textfile	16	85433445	A	C	456348	0.339551	3.3871	7.42559	0.64829	0.061428	0.13467	0.64829	1	-0.0141909	91.9178362367876
13	rs10424732	G	A	0.89125	0.0175012	0.00301897	exposure	TRUE	6.74809197374530e-09	inferred	R29r7e	textfile	19	33096487	A	G	454343	0.107324	-6.05534	4.83	0.209953	-0.259564	0.207039	0.209953	1	0.0086000703649902	33.6060957886072
14	rs10434439	G	A	0.930559	-0.0225658	0.00369964	exposure	TRUE	1.06428502275036e-09	inferred	R29r7e	textfile	4	55402621	A	G	454487	0.068706	-0.928679	3.96373	0.814757	-0.0591094	0.252287	0.814757	1	-0.00904719	37.2033918666452
15	rs10447226	G	T	0.712775	0.0138224	0.00207896	exposure	TRUE	2.95674971013375e-11	inferred	R29r7e	textfile	5	139028810	T	G	444790	0.285026	4.75315	6.98748	0.496354	0.0973509	0.143113	0.496354	1	0.00996871574009207	44.2053309660238
16	rs10457256	T	C	0.800795	0.0178553	0.00232855	exposure	TRUE	1.74711401819266e-14	inferred	R29r7e	textfile	6	113436720	C	T	454786	0.198499	9.8469	6.23161	0.114072	0.25357	0.160472	0.114072	1	0.0113697501824924	58.7980830581249
17	rs10458728	T	C	0.739664	0.0183672	0.00214983	exposure	TRUE	1.30149728512639e-17	inferred	R29r7e	textfile	10	101323976	C	T	451644	0.259248	0.223772	6.83081	0.973867	0.0047958	0.146396	0.973867	1	0.0127117863080447	72.992404797929
18	rs1045957	A	T	0.370181	0.00962267	0.00194076	exposure	TRUE	7.11504747955008e-07	inferred	R29r7e	textfile	7	20454814	A	T	452751	0.369651	-17.2607	7.55271	0.0222919	-0.302588	0.132627	0.0225192	1	0.00736857009805676	24.5837153973276
19	rs1047891	C	A	0.684259	0.0332237	0.00200133	exposure	TRUE	6.87562561161172e-62	inferred	R29r7e	textfile	2	211540507	A	C	456348	0.315793	-4.61897	7.27173	0.525301	-0.0873514	0.137519	0.525301	1	0.0245669403616985	275.586907963488
20	rs10762861	A	G	0.309591	-0.0184386	0.00204647	exposure	TRUE	2.06143456230329e-19	inferred	R29r7e	textfile	10	81137196	A	G	443796	0.308223	15.1897	7.16233	0.0339409	0.296101	0.139595	0.0339092	1	-0.0135236	81.1792661301569
21	rs10769981	T	C	0.547906	0.0250287	0.0018784	exposure	TRUE	1.66794704561776e-40	inferred	R29r7e	textfile	11	9024460	C	T	455706	0.453128	-3.05317	7.7979	0.6954	-0.0502107	0.12824	0.6954	1	0.0197344128278492	177.541721417848
22	rs10774048	T	C	0.229289	0.0122661	0.00228443	exposure	TRUE	7.89833901765701e-08	inferred	R29r7e	textfile	12	2562541	T	C	411906	0.21623	-4.27829	6.13038	0.48525	-0.11384	0.163122	0.48525	1	0.00836595343436321	28.8308397545283
23	rs10774408	A	T	0.508144	0.0520076	0.00186781	exposure	TRUE	1.26763095289168e-170	inferred	R29r7e	textfile	12	6286111	T	A	446586	0.492763	9.09587	7.74823	0.240424	0.151509	0.129062	0.240424	1	0.0416299493829776	775.29723150829
24	rs10775305	A	G	0.236055	0.0138731	0.00221528	exposure	TRUE	3.78953723328861e-10	inferred	R29r7e	textfile	16	68656460	A	G	453892	0.235239	6.35904	6.63747	0.338037	0.14434	0.15066	0.338037	1	0.00929503054028868	39.2183917456205
25	rs10813156	T	C	0.305877	-0.0316757	0.00203091	exposure	TRUE	7.65336952909352e-55	inferred	R29r7e	textfile	9	307197	T	C	450695	0.304269	-8.07392	7.15517	0.25915	-0.157705	0.139759	0.25915	1	-0.0232262	243.260214966634
26	rs10817007	T	G	0.871108	-0.0215308	0.00278493	exposure	TRUE	1.06552764782938e-14	inferred	R29r7e	textfile	9	113155247	G	T	455308	0.12846	4.07302	5.2542	0.438225	0.147538	0.190324	0.438225	1	-0.0114569	59.7711713013498
27	rs10840453	C	T	0.713692	0.0238169	0.00206616	exposure	TRUE	9.62979845421295e-31	inferred	R29r7e	textfile	11	10664901	T	C	454348	0.285696	-1.28803	7.0694	0.855428	-0.0257727	0.141455	0.855428	1	0.0170987527793834	132.874782710734
28	rs10849334	A	G	0.722764	0.0246613	0.00207758	exposure	TRUE	1.69053366011175e-32	inferred	R29r7e	textfile	12	719312	G	A	455248	0.276402	-0.691884	6.97902	0.921029	-0.0142051	0.143287	0.921029	1	0.0175900851996486	140.901760983983
29	rs10876550	G	A	0.44136	-0.0566736	0.0018666	exposure	TRUE	1.74783856577591e-202	inferred	R29r7e	textfile	12	54712308	G	A	456348	0.441332	-16.3899	7.79475	0.0354928	-0.269757	0.128381	0.0356207	1	-0.0448998	921.847491522548
30	rs10886430	A	G	0.872659	0.0311539	0.00287083	exposure	TRUE	1.95367014139926e-27	inferred	R29r7e	textfile	10	121010256	G	A	440080	0.119584	4.75216	5.01401	0.343244	0.189026	0.199441	0.343244	1	0.0163561850888812	117.763279421513
31	rs10888971	T	C	0.110436	-0.0208933	0.00295766	exposure	TRUE	1.61623310979966e-12	inferred	R29r7e	textfile	1	56932261	T	C	455948	0.110285	-2.83946	4.89085	0.561533	-0.118705	0.204463	0.561533	1	-0.0104611	49.901957803129
32	rs10910476	C	T	0.444415	-0.0136122	0.00187348	exposure	TRUE	3.71028798874186e-13	inferred	R29r7e	textfile	1	234734956	C	T	446881	0.443335	-8.06598	7.70093	0.294914	-0.13601	0.129854	0.294914	1	-0.0108682	52.7908336708214
33	rs10940072	G	A	0.599023	0.0254786	0.0019217	exposure	TRUE	4.03599365280349e-40	inferred	R29r7e	textfile	5	65916784	A	G	444281	0.399597	1.1179	7.57568	0.882687	0.0194786	0.132001	0.882687	1	0.019887316150664	175.784242190354
34	rs10954244	A	C	0.0879264	0.0343942	0.00331508	exposure	TRUE	3.21963164824564e-25	inferred	R29r7e	textfile	7	129221783	A	C	454365	0.0866792	-0.185903	4.3927	0.966243	-0.00963438	0.227651	0.966243	1	0.0153899880291413	107.642158528031
35	rs10973700	G	C	0.511052	0.0257391	0.00187162	exposure	TRUE	4.93283966157213e-43	inferred	R29r7e	textfile	9	38196117	C	G	450066	0.489774	1.56929	7.77329	0.840008	0.0259714	0.128646	0.840008	1	0.0204949711549427	189.126053228941
36	rs10975153	G	C	0.741638	0.0127993	0.00214746	exposure	TRUE	2.5192301076434e-09	inferred	R29r7e	textfile	9	5506383	C	G	442476	0.255239	0.540166	6.73535	0.936079	0.0119071	0.14847	0.936079	1	0.00895983112631865	35.5240334877011
37	rs10990535	C	T	0.764328	-0.0458782	0.00219745	exposure	TRUE	8.5000977203381e-97	inferred	R29r7e	textfile	9	99091009	T	C	456348	0.23557	-10.8414	6.64271	0.102664	-0.245694	0.150541	0.102664	1	-0.0308911	435.887822779135
38	rs11045637	G	A	0.451839	-0.00999871	0.00187479	exposure	TRUE	9.64742519558786e-08	inferred	R29r7e	textfile	12	21139916	G	A	446066	0.452188	-2.49627	7.7082	0.746055	-0.0420131	0.129732	0.746055	1	-0.00798507	28.443477233227
39	rs11071720	T	C	0.299723	-0.0427511	0.00205703	exposure	TRUE	6.17778797706943e-96	inferred	R29r7e	textfile	15	63341996	T	C	456348	0.299238	-4.15132	7.16611	0.562387	-0.0808388	0.139546	0.562387	1	-0.0307506	431.929967256643
40	rs1108084	T	C	0.389241	-0.012169	0.00193651	exposure	TRUE	3.30002333360017e-10	inferred	R29r7e	textfile	4	141852918	T	C	443706	0.386738	11.2472	7.53808	0.135686	0.197935	0.13266	0.135686	1	-0.00943342	39.4884688278756
41	rs11082304	G	T	0.487151	0.0544573	0.00188487	exposure	TRUE	1.51327521442562e-183	inferred	R29r7e	textfile	18	20720973	G	T	456348	0.48663	9.66065	7.83673	0.217673	0.157303	0.127604	0.217673	1	0.0427297883363887	834.736503751786
42	rs11088304	G	A	0.618597	-0.0225382	0.00194983	exposure	TRUE	6.64327729305392e-31	inferred	R29r7e	textfile	21	36395061	A	G	452766	0.381958	3.02928	7.57985	0.689415	0.0527253	0.131929	0.689415	1	-0.017176	133.611844847272
43	rs11107928	C	A	0.929157	-0.0281629	0.00361682	exposure	TRUE	6.88109426448187e-15	inferred	R29r7e	textfile	12	95575951	A	C	456348	0.0707958	-2.3981	4.01429	0.550247	-0.148816	0.24911	0.550247	1	-0.0115259	60.6318689081939
44	rs11119340	T	A	0.78891	0.0128944	0.00227045	exposure	TRUE	1.35305143707063e-08	inferred	R29r7e	textfile	1	209940560	A	T	454374	0.210835	1.32008	6.4008	0.836606	0.0322204	0.15623	0.836606	1	0.0084249629970864	32.2536146042048
45	rs11122983	G	A	0.765845	0.012729	0.00220122	exposure	TRUE	7.35100769693945e-09	inferred	R29r7e	textfile	2	112584291	A	G	455658	0.233948	6.42774	6.62617	0.33202	0.146397	0.150917	0.33202	1	0.00856636064500286	33.4396461173704
46	rs11129295	C	T	0.638762	-0.015844	0.00193157	exposure	TRUE	2.35137621790028e-16	inferred	R29r7e	textfile	3	27788780	T	C	456348	0.360406	2.7319	7.52287	0.716496	0.0482721	0.132928	0.716496	1	-0.0121416	67.2835293586966
47	rs11168249	T	C	0.539374	-0.031121	0.00186629	exposure	TRUE	1.98117245287026e-62	inferred	R29r7e	textfile	12	48208368	C	T	449970	0.460272	-9.21169	7.75968	0.235179	-0.152986	0.128871	0.235179	1	-0.0248513	278.066601557591
48	rs111941366	C	T	0.55415	0.0347715	0.0018571	exposure	TRUE	3.18233961864354e-78	inferred	R29r7e	textfile	1	25736369	T	C	456348	0.446758	15.2992	7.82241	0.0504872	0.250027	0.127838	0.0504872	1	0.0277060274715897	350.571229729529
49	rs11195957	C	T	0.920386	0.0225902	0.00350967	exposure	TRUE	1.22211891058836e-10	inferred	R29r7e	textfile	10	114196220	T	C	450426	0.076633	4.25113	4.14444	0.305013	0.247498	0.241287	0.305013	1	0.00959009830522632	41.4292990026395
50	rs11207138	G	C	0.735312	-0.0256985	0.0021	exposure	TRUE	1.96264013050821e-34	inferred	R29r7e	textfile	1	40392157	C	G	456023	0.264762	1.47601	6.93096	0.831359	0.0307257	0.14428	0.831359	1	-0.0181186	149.753492573696
51	rs11225024	A	T	0.916269	-0.019585	0.00338487	exposure	TRUE	7.20642012059436e-09	inferred	R29r7e	textfile	11	101695749	T	A	453713	0.0827153	-4.2187	4.30775	0.327418	-0.227341	0.23214	0.327418	1	-0.00858966	33.4782820786182
52	rs11227261	C	G	0.63107	0.0252229	0.00193661	exposure	TRUE	8.90676227056884e-39	inferred	R29r7e	textfile	11	65462843	G	C	452602	0.369088	2.73392	7.55252	0.717361	0.0479295	0.132406	0.717361	1	0.0193559371486324	169.631185007466
53	rs112423577	C	T	0.975726	-0.0549546	0.00608202	exposure	TRUE	1.63129669669106e-19	inferred	R29r7e	textfile	5	176700972	T	C	456213	0.023911	2.15573	2.38659	0.366384	0.378476	0.419008	0.366384	1	-0.0133763	81.6417704967715
54	rs11242732	C	T	0.556518	0.0116208	0.0018714	exposure	TRUE	5.30917286333384e-10	inferred	R29r7e	textfile	6	2037175	T	C	456348	0.44409	12.7786	7.7774	0.100375	0.211258	0.128578	0.100375	1	0.00919187119396497	38.5601578756766
55	rs11244035	C	T	0.894344	-0.0167285	0.00303089	exposure	TRUE	3.40283185126107e-08	inferred	R29r7e	textfile	9	136081319	T	C	456348	0.105973	1.22169	4.81143	0.799562	0.0527731	0.207838	0.799562	1	-0.00817006	30.4630688281961
56	rs11259186	T	G	0.460774	0.0158041	0.00188314	exposure	TRUE	4.76239930292916e-17	inferred	R29r7e	textfile	10	14603429	T	G	454575	0.460345	-13.271	7.79339	0.0885942	-0.218501	0.128314	0.0885942	1	0.012446627709545	70.4326974233019
57	rs112897166	T	A	0.852941	0.0191212	0.00270404	exposure	TRUE	1.53439019881399e-12	inferred	R29r7e	textfile	11	5719017	A	T	433377	0.137262	8.95824	5.25514	0.0882576	0.32438	0.19029	0.0882576	1	0.0107410082824391	50.0039215013062
58	rs1130276	T	G	0.247481	-0.0157013	0.00217034	exposure	TRUE	4.67286570654666e-13	inferred	R29r7e	textfile	11	831809	T	G	454461	0.245298	4.75142	6.71186	0.478999	0.105472	0.14899	0.478999	1	-0.0107309	52.3378253827035
59	rs113693454	T	A	0.968114	0.0637548	0.0053353	exposure	TRUE	6.52238901500637e-33	inferred	R29r7e	textfile	4	106207763	A	T	456280	0.0316998	-1.71873	2.73287	0.529407	-0.230129	0.365916	0.529407	1	0.017687698729962	142.793384163251
60	rs113825134	G	A	0.766079	0.0178113	0.00219361	exposure	TRUE	4.67609809857638e-16	inferred	R29r7e	textfile	12	78220740	A	G	454682	0.233459	-3.01667	6.62172	0.648698	-0.0687996	0.151018	0.648698	1	0.012040701549167	65.9283797564125
61	rs114418931	T	C	0.986889	0.0618166	0.00841717	exposure	TRUE	2.07136839627476e-13	inferred	R29r7e	textfile	3	47776704	C	T	455223	0.0128267	-0.19985	1.77244	0.910225	-0.0636154	0.564194	0.910225	1	0.0108843411373985	53.935912658039
62	rs114694170	T	C	0.941543	-0.149938	0.0040259	exposure	TRUE	1.35766288465288e-303	inferred	R29r7e	textfile	5	88180196	C	T	452653	0.057005	-1.74267	3.60003	0.628335	-0.134464	0.277776	0.628335	1	-0.0552717	1387.06706806482
63	rs114968084	G	A	0.970318	0.0697461	0.00567842	exposure	TRUE	1.12246555757193e-34	inferred	R29r7e	textfile	9	136022954	A	G	449994	0.0260459	4.8806	2.45477	0.0467887	0.809935	0.407369	0.0467887	1	0.0183070021161898	150.863727170329
64	rs115243514	G	C	0.982691	-0.108039	0.00723324	exposure	TRUE	1.90847805884142e-50	inferred	R29r7e	textfile	3	183926133	C	G	454511	0.0165178	-1.16899	2.02143	0.563062	-0.286084	0.494699	0.563062	1	-0.0221498	223.097837619045
65	rs115294879	G	A	0.959749	-0.0317796	0.00470677	exposure	TRUE	1.45930069703884e-11	inferred	R29r7e	textfile	1	79467975	A	G	456348	0.0403541	0.0227587	3.09262	0.994128	0.00237955	0.323351	0.994128	1	-0.0099944	45.5880378079673
66	rs1153998	C	T	0.0582403	0.0410234	0.00399806	exposure	TRUE	1.05797299076526e-24	inferred	R29r7e	textfile	7	158620659	C	T	455693	0.0580511	3.387	3.7067	0.360849	0.246513	0.269781	0.360849	1	0.0151983679286655	105.284560480605
67	rs11553699	A	G	0.864615	0.113052	0.00282624	exposure	TRUE	0	inferred	R29r7e	textfile	12	122216910	G	A	425219	0.120753	1.0369	4.90725	0.832653	0.0430588	0.20378	0.832653	1	0.0612277530812822	1600.06793550372
68	rs115566353	G	A	0.989008	0.0565236	0.00957614	exposure	TRUE	3.57935823850702e-09	inferred	R29r7e	textfile	2	235939201	A	G	451378	0.0084375	-0.085304	1.44014	0.952766	-0.0411303	0.694378	0.952766	1	0.00878523404161233	34.8400408346957
69	rs11585973	A	G	0.841271	0.0153231	0.0025312	exposure	TRUE	1.41564964347225e-09	inferred	R29r7e	textfile	1	248071120	G	A	456189	0.158755	3.05787	5.73916	0.594167	0.0928373	0.174242	0.594167	1	0.00896254353002036	36.6471620038431
70	rs11601507	C	A	0.930648	0.0381101	0.00363043	exposure	TRUE	8.87858453865597e-26	inferred	R29r7e	textfile	11	5701074	A	C	456348	0.0691216	4.72977	4.05419	0.243357	0.287761	0.246658	0.243357	1	0.0155375474490187	110.195546234593
71	rs11604127	C	T	0.770084	-0.0944702	0.00223577	exposure	TRUE	0	inferred	R29r7e	textfile	11	196944	T	C	446898	0.229099	0.168773	6.54178	0.979417	0.00394377	0.152864	0.979417	1	-0.063081	1785.39954912311
72	rs116052829	C	T	0.895738	-0.0336619	0.00306405	exposure	TRUE	4.45870884427154e-28	inferred	R29r7e	textfile	10	81164146	T	C	456348	0.103917	-5.76367	4.81081	0.230891	-0.249037	0.207865	0.230891	1	-0.0162607	120.693965067823
73	rs11606890	A	C	0.90159	0.0211181	0.00313298	exposure	TRUE	1.57756420868233e-11	inferred	R29r7e	textfile	11	100471466	C	A	456348	0.0981838	-3.9261	4.64639	0.398122	-0.181857	0.215221	0.398122	1	0.00997765484991911	45.4354087173347
74	rs11627485	T	C	0.553508	-0.0269302	0.00189696	exposure	TRUE	9.62981781147495e-46	inferred	R29r7e	textfile	14	65487694	C	T	453403	0.447464	2.49962	7.77409	0.747807	0.0413595	0.128632	0.747807	1	-0.0210787	201.54072241179
75	rs11642754	A	G	0.900566	-0.0177935	0.00314602	exposure	TRUE	1.55053101597555e-08	inferred	R29r7e	textfile	16	88067579	G	A	456348	0.0995468	3.69146	4.6742	0.429672	0.16896	0.21394	0.429672	1	-0.00837216	31.9889368743393
76	rs11653367	A	G	0.671877	0.0156262	0.00200527	exposure	TRUE	6.56615473145179e-15	inferred	R29r7e	textfile	17	44191483	G	A	447104	0.32645	-0.192786	7.29493	0.978916	-0.00362271	0.137081	0.978916	1	0.0116532677581711	60.7240940135012
77	rs11655000	T	C	0.483146	0.0687915	0.00187479	exposure	TRUE	9.47520613585865e-295	inferred	R29r7e	textfile	17	27767343	T	C	456291	0.483507	2.28767	7.82243	0.769943	0.0373861	0.127838	0.769943	1	0.054240334558504	1346.36961534498
78	rs11655709	T	C	0.896932	-0.027429	0.0030836	exposure	TRUE	5.83548484791462e-19	inferred	R29r7e	textfile	17	56400617	C	T	455032	0.102695	4.17211	4.73546	0.378299	0.186051	0.211173	0.378299	1	-0.0131854	79.1232057842576
79	rs11667509	G	C	0.620485	0.0435657	0.00195763	exposure	TRUE	1.02463645689068e-109	inferred	R29r7e	textfile	19	45716192	C	G	441407	0.377322	-1.4361	7.45724	0.84729	-0.0258242	0.134098	0.84729	1	0.0334774183147602	495.254202504064
80	rs11668882	T	C	0.56117	-0.0171185	0.00189666	exposure	TRUE	1.78708575497762e-19	inferred	R29r7e	textfile	19	54675097	C	T	452987	0.439227	10.4415	7.73196	0.176875	0.174657	0.129333	0.176875	1	-0.013409	81.4615077435694
81	rs11686139	A	C	0.807436	-0.0313399	0.00236319	exposure	TRUE	3.86080762960605e-40	inferred	R29r7e	textfile	2	227291415	C	A	455181	0.192852	-1.06043	6.21834	0.864592	-0.027424	0.160815	0.864592	1	-0.0196528	175.872498076135
82	rs117119759	G	A	0.971749	0.0473065	0.00573674	exposure	TRUE	1.63464530318911e-16	inferred	R29r7e	textfile	9	136212168	A	G	453154	0.0264358	-1.68572	2.54822	0.508274	-0.259603	0.39243	0.508274	1	0.0122490136050426	68.0003739259713
83	rs11734099	G	A	0.82465	-0.0565521	0.00246935	exposure	TRUE	4.47728772485587e-116	inferred	R29r7e	textfile	4	6891435	A	G	455431	0.175471	1.64096	5.95953	0.783048	0.0462033	0.167798	0.783048	1	-0.0339161	524.483913957492
84	rs11735996	T	C	0.207301	0.0180348	0.00233939	exposure	TRUE	1.26619633669579e-14	inferred	R29r7e	textfile	4	148296166	T	C	444059	0.202619	-12.5708	6.21405	0.0430776	-0.325546	0.160857	0.042989	1	0.0115680532881654	59.4315973134475
85	rs11754773	A	G	0.906505	0.0260233	0.00321632	exposure	TRUE	5.91685647258266e-16	inferred	R29r7e	textfile	6	34577257	G	A	453045	0.0923661	7.114	4.53835	0.116991	0.345396	0.220344	0.116991	1	0.0120199325154101	65.4645571134142
86	rs117635034	T	A	0.861394	0.0156048	0.00277261	exposure	TRUE	1.8210124774473e-08	inferred	R29r7e	textfile	16	29849563	A	T	441073	0.132131	0.152797	5.2247	0.976669	0.00559745	0.191398	0.976669	1	0.00847421688724876	31.6766206163969
87	rs11764390	G	A	0.560707	-0.0251493	0.00190901	exposure	TRUE	1.23855731184995e-39	inferred	R29r7e	textfile	7	80216205	A	G	434425	0.436607	4.86905	7.59925	0.521699	0.0843147	0.131592	0.521699	1	-0.0199836	173.554307192337
88	rs11768384	A	G	0.613503	-0.0148031	0.00191999	exposure	TRUE	1.25829497311505e-14	inferred	R29r7e	textfile	7	2499770	G	A	456348	0.386787	-5.06781	7.62789	0.506448	-0.0870987	0.131098	0.506448	1	-0.0114124	59.4439160835594
89	rs11779638	A	C	0.765905	-0.0260599	0.00222715	exposure	TRUE	1.25948407921445e-31	inferred	R29r7e	textfile	8	22440208	C	A	452802	0.233111	3.74031	6.592	0.570442	0.0860742	0.151699	0.570442	1	-0.0173862	136.913588560713
90	rs11818463	G	C	0.633113	0.0201476	0.00195109	exposure	TRUE	5.35709306327085e-25	inferred	R29r7e	textfile	10	25223367	C	G	455285	0.36771	-0.805943	7.55489	0.915044	-0.0141204	0.132365	0.915044	1	0.0153022201976769	106.633099740228
91	rs11841319	C	T	0.897976	0.0603349	0.00312124	exposure	TRUE	2.97945588095552e-83	inferred	R29r7e	textfile	13	110492626	T	C	454397	0.101206	6.83334	4.73566	0.149033	0.3047	0.211164	0.149033	1	0.02866461854349	373.665383607608
92	rs11883511	G	A	0.670924	0.012509	0.00198666	exposure	TRUE	3.04445914851562e-10	inferred	R29r7e	textfile	2	208405892	A	G	452554	0.329294	-3.21424	7.3613	0.662373	-0.0593156	0.135846	0.662373	1	0.00935935193650684	39.645882521129
93	rs11917130	T	A	0.353508	0.016564	0.00194528	exposure	TRUE	1.66634058859388e-17	inferred	R29r7e	textfile	3	69855694	T	A	455168	0.352179	-1.85201	7.47403	0.804295	-0.0331538	0.133797	0.804295	1	0.0126201235326368	72.504706733119
94	rs11950562	A	C	0.524326	0.0291702	0.00187258	exposure	TRUE	1.03451547554117e-54	inferred	R29r7e	textfile	5	131652529	C	A	455835	0.475884	3.39437	7.83489	0.664842	0.055296	0.127634	0.664842	1	0.0230664403447327	242.659921269178
95	rs12000252	A	G	0.450764	0.0205641	0.00188464	exposure	TRUE	1.01655050707587e-27	inferred	R29r7e	textfile	9	73037963	A	G	444928	0.449469	10.114	7.69365	0.188649	0.170866	0.129977	0.188649	1	0.0163560831881932	119.05910275713
96	rs12041331	G	A	0.914528	-0.0402082	0.00332428	exposure	TRUE	1.11818187144651e-33	inferred	R29r7e	textfile	1	156869714	A	G	453717	0.0836292	0.760446	4.31394	0.860077	0.0408621	0.231807	0.860077	1	-0.0179538	146.296544904234
97	rs12052715	C	G	0.275213	0.0336657	0.00208352	exposure	TRUE	9.96029305100915e-59	inferred	R29r7e	textfile	2	160677375	C	G	455736	0.274065	4.21889	6.99017	0.546145	0.0863422	0.143058	0.546145	1	0.0239281925688165	261.08381541955
98	rs12118065	G	A	0.416809	0.0307809	0.00188682	exposure	TRUE	7.89464047283811e-60	inferred	R29r7e	textfile	1	248027532	G	A	446869	0.416527	6.037	7.65397	0.430263	0.10305	0.130651	0.430263	1	0.0243967747065974	266.134811577902
99	rs12119893	G	A	0.863857	0.0324965	0.00283562	exposure	TRUE	2.09263456081326e-30	inferred	R29r7e	textfile	1	10483167	A	G	418925	0.123403	-0.301345	4.93405	0.9513	-0.0123782	0.202673	0.9513	1	0.017703265766087	131.333982846308
100	rs12126199	C	T	0.966723	-0.0536707	0.00516341	exposure	TRUE	2.62855853610839e-25	inferred	R29r7e	textfile	1	43859227	T	C	456135	0.0332544	2.41639	2.87772	0.401083	0.29179	0.347498	0.401083	1	-0.0153888	108.044159700021
101	rs12127600	T	A	0.394478	-0.0130734	0.00189715	exposure	TRUE	5.53729360864171e-12	inferred	R29r7e	textfile	1	154356377	T	A	453871	0.394666	-6.03009	7.65955	0.431127	-0.102782	0.130556	0.431127	1	-0.0102282	47.486893324769
102	rs12149168	G	T	0.723502	-0.0199474	0.00211083	exposure	TRUE	3.38744066403032e-21	inferred	R29r7e	textfile	16	85705611	T	G	448801	0.274518	-10.2142	6.91622	0.139718	-0.213533	0.144588	0.139718	1	-0.0141047	89.3030058917641
103	rs12170411	C	T	0.810887	-0.0266341	0.00240826	exposure	TRUE	1.97240688541041e-28	inferred	R29r7e	textfile	22	50318741	T	C	455777	0.18866	7.82452	6.11634	0.200798	0.209158	0.163496	0.200798	1	-0.0163795	122.31206751706
104	rs12186102	G	A	0.705097	0.0111895	0.0020736	exposure	TRUE	6.80781018238542e-08	inferred	R29r7e	textfile	3	172267719	A	G	431482	0.287781	-6.4954	6.88097	0.345187	-0.137185	0.145328	0.345187	1	0.00821468108357843	29.1186604952598
105	rs12316253	T	C	0.732048	0.0138233	0.00210161	exposure	TRUE	4.78484738101663e-11	inferred	R29r7e	textfile	12	110046051	C	T	450048	0.266112	2.79155	6.87695	0.684795	0.0590274	0.145413	0.684795	1	0.00980415752634889	43.2632572792717
106	rs12343129	C	A	0.90556	-0.0257333	0.00318475	exposure	TRUE	6.46801129787461e-16	inferred	R29r7e	textfile	9	116345565	A	C	456276	0.094731	1.90633	4.57936	0.6772	0.0909049	0.218371	0.6772	1	-0.0119612	65.2890386011162
107	rs12376511	T	C	0.838041	0.0449319	0.00253597	exposure	TRUE	3.05439177823574e-70	inferred	R29r7e	textfile	9	22142756	C	T	454454	0.160973	-6.44224	5.73892	0.261627	-0.195604	0.174249	0.261627	1	0.0262734264814429	313.921704685036
108	rs12416046	A	G	0.869102	-0.0225328	0.00278324	exposure	TRUE	5.68479955615336e-16	inferred	R29r7e	textfile	10	89861218	G	A	454762	0.130066	-5.835	5.26586	0.267827	-0.210427	0.189903	0.267827	1	-0.0120044	65.5434064812665
109	rs12424285	C	A	0.886845	-0.0383918	0.00292463	exposure	TRUE	2.30423495832923e-39	inferred	R29r7e	textfile	12	51655770	A	C	455482	0.112843	-3.96419	4.97119	0.4252	-0.160411	0.201159	0.4252	1	-0.0194469	172.319762702993
110	rs12439144	G	A	0.603391	-0.0145636	0.00192457	exposure	TRUE	3.81363851578738e-14	inferred	R29r7e	textfile	15	78536924	A	G	456203	0.396926	8.48185	7.6758	0.269155	0.14396	0.13028	0.269155	1	-0.0112029	57.2624678394813
111	rs12441457	G	A	0.0486957	0.0292859	0.00436818	exposure	TRUE	2.02275536774835e-11	inferred	R29r7e	textfile	15	65082082	G	A	456348	0.0485156	-4.13056	3.4	0.224416	-0.357315	0.294118	0.224416	1	0.00992406357332791	44.9486
112	rs12451471	C	T	0.626975	0.0132056	0.00193886	exposure	TRUE	9.69141036307242e-12	inferred	R29r7e	textfile	17	78102517	T	C	452256	0.372573	4.54748	7.54861	0.54689	0.0798063	0.132475	0.54689	1	0.0101274056598008	46.3898934127532
113	rs12546445	C	G	0.698311	0.0121582	0.00205314	exposure	TRUE	3.18516428678792e-09	inferred	R29r7e	textfile	8	129054881	G	C	447759	0.299723	-9.15139	7.11255	0.198215	-0.180899	0.140596	0.198215	1	0.00884937341232901	35.0672280777834
114	rs1260326	T	C	0.39534	0.0433875	0.00190388	exposure	TRUE	5.8961241958202e-115	inferred	R29r7e	textfile	2	27730940	T	C	456348	0.394766	9.07113	7.66592	0.236688	0.154359	0.130448	0.236688	1	0.0337156044538687	519.338010609261
115	rs12614923	A	G	0.623872	-0.0124225	0.00194559	exposure	TRUE	1.71450526218787e-10	inferred	R29r7e	textfile	2	170616257	G	A	436073	0.372831	3.33692	7.40308	0.652171	0.0608865	0.135079	0.652171	1	-0.00966849	40.767620170033
116	rs12631447	T	C	0.374316	0.0198288	0.00193045	exposure	TRUE	9.46273411333184e-25	inferred	R29r7e	textfile	3	168858226	T	C	445702	0.372807	6.77104	7.49537	0.366333	0.120523	0.133416	0.366333	1	0.0153838544019483	105.505657802223
117	rs1265564	A	C	0.557408	-0.0740955	0.0019008	exposure	TRUE	0	inferred	R29r7e	textfile	12	111708458	C	A	435858	0.441769	2.07886	7.59701	0.78436	0.0360197	0.131631	0.78436	1	-0.0589424	1519.54
118	rs12666334	G	T	0.581184	0.0728139	0.00191825	exposure	TRUE	0	inferred	R29r7e	textfile	7	106308675	T	G	436865	0.417206	-6.56521	7.55834	0.385064	-0.11492	0.132304	0.385064	1	0.0573352148674143	1440.84801412431
119	rs12676105	C	T	0.494347	0.0184351	0.00188104	exposure	TRUE	1.12048886387179e-22	inferred	R29r7e	textfile	8	56795439	C	T	452203	0.494619	12.8778	7.80265	0.0988529	0.211523	0.128162	0.0988529	1	0.0145725511901648	96.0494613821621
120	rs12762934	C	T	0.676385	-0.0173591	0.00200586	exposure	TRUE	4.96410531135936e-18	inferred	R29r7e	textfile	10	104359884	T	C	455190	0.323721	17.1522	7.33035	0.0192895	0.319206	0.136604	0.0194533	1	-0.0128261	74.8950601832241
121	rs12888043	G	A	0.863453	0.0564772	0.00274016	exposure	TRUE	2.19059735134127e-94	inferred	R29r7e	textfile	14	101170436	A	G	454050	0.13569	1.90046	5.34058	0.72195	0.066632	0.187246	0.72195	1	0.0305733678982688	424.809744229997
122	rs12909131	C	T	0.75822	-0.0181992	0.00220404	exposure	TRUE	1.49128910289486e-16	inferred	R29r7e	textfile	15	50387678	T	C	452655	0.240672	4.50674	6.69533	0.500872	0.100536	0.149358	0.500872	1	-0.0122721	68.1813586734209
123	rs12948394	C	T	0.517687	-0.0110813	0.00190493	exposure	TRUE	5.98525740813883e-09	inferred	R29r7e	textfile	17	76382791	T	C	428638	0.480424	3.42009	7.58483	0.652054	0.0594491	0.131842	0.652054	1	-0.00888485	33.8394567431473
124	rs12975577	C	T	0.523579	0.0137289	0.00189071	exposure	TRUE	3.83556312679974e-13	inferred	R29r7e	textfile	19	33755364	T	C	445884	0.476761	-11.5312	7.73977	0.136262	-0.192494	0.129203	0.136262	1	0.0108736455982941	52.725613401017
125	rs13041	C	T	0.476117	0.0135301	0.00191175	exposure	TRUE	1.46950328722579e-12	inferred	R29r7e	textfile	19	4502282	C	T	423122	0.474304	-5.22539	7.55764	0.489311	-0.0914842	0.132316	0.489311	1	0.010879587423714	50.0887063434201
126	rs13084317	G	A	0.670504	-0.0199023	0.00197681	exposure	TRUE	7.66060388155266e-24	inferred	R29r7e	textfile	3	39187858	A	G	452899	0.329249	0.664332	7.34845	0.927966	0.0123025	0.136083	0.927966	1	-0.0149586	101.36235169578
127	rs13084357	T	C	0.9164	-0.0407011	0.00337463	exposure	TRUE	1.69900579758884e-33	inferred	R29r7e	textfile	3	184094501	C	T	454147	0.0824942	1.7187	4.30168	0.689494	0.0928804	0.232467	0.689494	1	-0.0178942	145.465487745529
128	rs13108218	A	G	0.384588	0.0215243	0.00194547	exposure	TRUE	1.87952090504643e-28	inferred	R29r7e	textfile	4	3443931	A	G	441952	0.381581	-3.90019	7.47856	0.602007	-0.0697348	0.133716	0.602007	1	0.0166401713406124	122.407772964443
129	rs131190	G	T	0.141731	-0.0256473	0.00270033	exposure	TRUE	2.14290684516055e-21	inferred	R29r7e	textfile	22	29692497	G	T	456348	0.141896	7.94607	5.47834	0.146932	0.264761	0.182537	0.146932	1	-0.0140584	90.2089485761156
130	rs13150834	T	G	0.564024	-0.0228218	0.00189478	exposure	TRUE	2.07167515645177e-33	inferred	R29r7e	textfile	4	88222673	G	T	454051	0.436151	-12.5005	7.74565	0.106554	-0.208359	0.129105	0.106554	1	-0.0178719	145.071534969652
131	rs13154903	T	C	0.889296	0.0244557	0.00299922	exposure	TRUE	3.52022485643839e-16	inferred	R29r7e	textfile	5	77636732	C	T	450863	0.108746	-3.49985	4.84841	0.470383	-0.148885	0.206253	0.470383	1	0.0121427881921097	66.4880428977151
132	rs13325794	T	C	0.762781	0.010818	0.00218381	exposure	TRUE	7.28050868411872e-07	inferred	R29r7e	textfile	3	61934148	C	T	456348	0.236377	4.10029	6.66346	0.538331	0.0923453	0.150072	0.538331	1	0.00733285886364847	24.5394177240748
133	rs13405741	T	C	0.899378	0.0183543	0.00314221	exposure	TRUE	5.18238674942e-09	inferred	R29r7e	textfile	2	111913056	C	T	447193	0.0965612	-3.7435	4.59077	0.41482	-0.177626	0.217828	0.41482	1	0.00873452968272143	34.1197027582578
134	rs1340837	A	G	0.589609	-0.0132324	0.00190674	exposure	TRUE	3.92647056572773e-12	inferred	R29r7e	textfile	10	97542035	G	A	455016	0.411123	-2.21541	7.70766	0.773783	-0.0372914	0.129741	0.773783	1	-0.0102875	48.1608658810261
135	rs1347209	G	T	0.397885	-0.0166387	0.00189517	exposure	TRUE	1.64160641795908e-18	inferred	R29r7e	textfile	3	136626697	G	T	454270	0.397791	-8.98051	7.68342	0.242477	-0.152122	0.13015	0.242477	1	-0.013025	77.0801296941186
136	rs138283735	C	T	0.932356	-0.0285809	0.00369963	exposure	TRUE	1.11555092998513e-14	inferred	R29r7e	textfile	12	109159805	T	C	455229	0.0668356	-7.28208	3.89209	0.0613455	-0.480718	0.256932	0.0613455	1	-0.0114492	59.6808796850449
137	rs1388594	C	T	0.419548	0.0135628	0.0018902	exposure	TRUE	7.21354248955791e-13	inferred	R29r7e	textfile	12	40607647	C	T	446291	0.418236	4.36679	7.6416	0.567695	0.0747815	0.130863	0.567695	1	0.010740103290843	51.4852940562363
138	rs139039269	A	C	0.93088	0.0274843	0.00370607	exposure	TRUE	1.20689638017023e-13	inferred	R29r7e	textfile	5	1105142	C	A	453757	0.0684243	6.0393	3.96379	0.127604	0.384384	0.252284	0.127604	1	0.0110086492008096	54.9973956973354
139	rs139974673	T	C	0.973993	-0.10961	0.00592705	exposure	TRUE	2.34321847688164e-76	inferred	R29r7e	textfile	15	44027885	C	T	455890	0.0253043	-0.172485	2.44969	0.943867	-0.0287428	0.408214	0.943867	1	-0.0273791	341.997690793174
140	rs1416101	G	A	0.0965476	0.019565	0.00323453	exposure	TRUE	1.45935698207283e-09	inferred	R29r7e	textfile	10	76445206	G	A	447975	0.093513	-4.54143	4.52355	0.315401	-0.221939	0.221065	0.315401	1	0.0090370152355848	36.5878876971526
141	rs1436367	A	C	0.777337	0.0155921	0.00223628	exposure	TRUE	3.11716541102724e-12	inferred	R29r7e	textfile	12	64715216	C	A	452534	0.221679	-8.36369	6.4777	0.196651	-0.199323	0.154376	0.196651	1	0.0103640728812607	48.6134970450687
142	rs144317085	A	T	0.966287	-0.0409698	0.00524367	exposure	TRUE	5.5757602023591e-15	inferred	R29r7e	textfile	4	105806108	T	A	454144	0.0327969	2.14835	2.75242	0.435077	0.283581	0.363317	0.435077	1	-0.0115932	61.0459677548135
143	rs144597972	G	T	0.970974	0.0458612	0.00558781	exposure	TRUE	2.26094176204822e-16	inferred	R29r7e	textfile	1	247714214	T	G	453489	0.0276644	-5.56015	2.53472	0.0282643	-0.865421	0.391673	0.0271362	1	0.0121867839017138	67.3609
144	rs146437105	C	A	0.989263	0.0716118	0.00942737	exposure	TRUE	3.05050051657913e-14	inferred	R29r7e	textfile	17	4975011	A	C	453071	0.00855164	-2.07141	1.43286	0.148276	-1.00893	0.697906	0.148276	1	0.0112845490943585	57.7016291814096
145	rs147069404	A	G	0.97148	0.0335376	0.00572862	exposure	TRUE	4.78751712135672e-09	inferred	R29r7e	textfile	8	74903281	G	A	453180	0.0270444	-2.80214	2.57225	0.275989	-0.423511	0.388765	0.275989	1	0.00869623233701121	34.2739320580709
146	rs1472265	T	C	0.614935	0.0133707	0.00190926	exposure	TRUE	2.50396242806908e-12	inferred	R29r7e	textfile	6	166182901	C	T	455538	0.384905	-22.0322	7.62339	0.00385151	-0.379106	0.13169	0.00399211	1	0.0103753878835796	49.043125665858
147	rs1476096	A	C	0.418757	-0.0174204	0.00190953	exposure	TRUE	7.31585655874731e-20	inferred	R29r7e	textfile	5	133837021	A	C	441433	0.418017	6.14306	7.60947	0.419499	0.10609	0.131415	0.419499	1	-0.0137296	83.2268148347224
148	rs147886588	C	G	0.83446	0.0154593	0.00251461	exposure	TRUE	7.85688211247512e-10	inferred	R29r7e	textfile	6	119215902	G	C	452105	0.16338	-1.41971	5.76373	0.805436	-0.0427358	0.173499	0.805436	1	0.00914286568691886	37.7953501859281
149	rs149142833	C	T	0.843659	-0.0201424	0.00261522	exposure	TRUE	1.33962686797637e-14	inferred	R29r7e	textfile	20	32188142	T	C	450350	0.154068	-3.06472	5.64069	0.586907	-0.0963221	0.177283	0.586907	1	-0.0114763	59.3206600451772
150	rs149290349	G	A	0.925156	0.0699859	0.00357395	exposure	TRUE	2.19223604018715e-85	inferred	R29r7e	textfile	2	43451957	A	G	453035	0.0731235	-3.4369	4.02496	0.393163	-0.21215	0.248449	0.393163	1	0.0290812745714453	383.46361223416
151	rs150262359	G	A	0.95134	0.0254378	0.00455356	exposure	TRUE	2.31885769052362e-08	inferred	R29r7e	textfile	16	29006757	A	G	444274	0.0431963	-1.29701	3.12146	0.677765	-0.133116	0.320363	0.677765	1	0.00838086337486546	31.2073556255338
152	rs150296351	G	A	0.804032	0.0133623	0.00236932	exposure	TRUE	1.70327486200754e-08	inferred	R29r7e	textfile	13	50831119	A	G	456065	0.196048	-10.9072	6.19996	0.0785372	-0.28375	0.161291	0.0785372	1	0.00835083560196981	31.8064350592297
153	rs150861794	C	T	0.98174	0.0563445	0.00749385	exposure	TRUE	5.52959088700945e-14	inferred	R29r7e	textfile	13	109003805	T	C	447905	0.0134426	-2.10897	1.74955	0.228035	-0.688995	0.571574	0.228035	1	0.0112338117633598	56.5318329540401
154	rs150879344	T	C	0.983684	0.0443463	0.0077937	exposure	TRUE	1.27025340187131e-08	inferred	R29r7e	textfile	17	4944624	C	T	449283	0.0117988	-0.749978	1.64801	0.649051	-0.27614	0.606792	0.649051	1	0.00848865790999813	32.3763146429517
155	rs151234	G	C	0.86945	-0.0672379	0.00279703	exposure	TRUE	1.08711713000576e-127	inferred	R29r7e	textfile	16	28505660	C	G	455510	0.129435	-6.7157	5.24694	0.200571	-0.243938	0.190587	0.200571	1	-0.0355954	577.875168217951
156	rs1518368	G	A	0.327851	-0.0153697	0.00198566	exposure	TRUE	9.91448356171857e-15	inferred	R29r7e	textfile	2	198839145	G	A	455903	0.32822	-3.34876	7.36203	0.649204	-0.0617857	0.135832	0.649204	1	-0.011463	59.9129917633847
157	rs155002	C	T	0.974415	0.0497191	0.00605155	exposure	TRUE	2.10529489843949e-16	inferred	R29r7e	textfile	20	57875163	T	C	453872	0.0236542	-2.77063	2.37187	0.242758	-0.492488	0.421608	0.242758	1	0.012194348463546	67.5014753764639
158	rs155431	A	T	0.857262	0.0324178	0.00267329	exposure	TRUE	7.6395565336085e-34	inferred	R29r7e	textfile	5	72120916	T	A	454582	0.141602	-5.92919	5.46815	0.278225	-0.198296	0.182877	0.278225	1	0.0179829968576628	147.05335235361
159	rs1568145	G	A	0.883466	0.016003	0.00290116	exposure	TRUE	3.46665341371371e-08	inferred	R29r7e	textfile	2	72588669	A	G	456348	0.116755	1.02494	5.04642	0.839056	0.0402466	0.19816	0.839056	1	0.00816522435525225	30.4270220039663
160	rs165542	C	T	0.767596	0.0146209	0.00221186	exposure	TRUE	3.83727275102842e-11	inferred	R29r7e	textfile	5	173293036	T	C	455043	0.231677	-2.17535	6.5942	0.741484	-0.0500272	0.151648	0.741484	1	0.00979874276863619	43.6951207623817
161	rs167924	A	G	0.376419	-0.0185525	0.00192063	exposure	TRUE	4.47648156232344e-22	inferred	R29r7e	textfile	3	107379837	A	G	453057	0.376833	0.386724	7.59815	0.959407	0.00669863	0.131611	0.959407	1	-0.0143496	93.307695648563
162	rs16844866	T	C	0.824415	-0.0204989	0.00244402	exposure	TRUE	4.97138487726382e-17	inferred	R29r7e	textfile	2	161063407	C	T	455262	0.17585	4.27583	5.99961	0.476041	0.118788	0.166677	0.476041	1	-0.0124298	70.3479753288378
163	rs16871944	G	A	0.787714	0.0260138	0.00228791	exposure	TRUE	5.8909866552623e-30	inferred	R29r7e	textfile	7	18221376	A	G	455530	0.212088	-7.40925	6.40837	0.247606	-0.180418	0.156046	0.247606	1	0.0168440182772817	129.279517005171
164	rs1688008	G	A	0.197425	0.0158107	0.00236062	exposure	TRUE	2.11740432119108e-11	inferred	R29r7e	textfile	19	35656183	G	A	454771	0.196255	0.599195	6.18428	0.922814	0.0156671	0.1617	0.922814	1	0.0099313473334897	44.8590458443019
165	rs16922576	T	C	0.720606	0.032171	0.00209595	exposure	TRUE	3.58991968054794e-53	inferred	R29r7e	textfile	9	5064193	C	T	441346	0.274936	-5.82151	6.89232	0.398313	-0.122547	0.145089	0.398313	1	0.0230982535252249	235.595659594534
166	rs1716505	C	G	0.68297	-0.044337	0.00202116	exposure	TRUE	1.16755393367487e-106	inferred	R29r7e	textfile	12	65005079	G	C	435562	0.312215	-4.99627	7.10284	0.481795	-0.0990333	0.140789	0.481795	1	-0.0332202	481.206204473161
167	rs17175830	G	A	0.762693	-0.0336044	0.00223312	exposure	TRUE	3.54843387435476e-51	inferred	R29r7e	textfile	16	88558164	A	G	442494	0.231875	-0.733964	6.51403	0.910289	-0.0172972	0.153515	0.910289	1	-0.0226162	226.447832882641
168	rs17178	C	T	0.849235	0.0134244	0.00260807	exposure	TRUE	2.64326623961762e-07	inferred	R29r7e	textfile	11	92443409	T	C	455887	0.150791	10.0659	5.59688	0.0720999	0.321337	0.178671	0.0720999	1	0.00762316587380565	26.4942287148248
169	rs17322191	C	T	0.963999	0.0374768	0.00514325	exposure	TRUE	3.17877370347151e-13	inferred	R29r7e	textfile	20	43596259	T	C	451728	0.0333121	-4.19842	2.80046	0.133824	-0.535338	0.357084	0.133824	1	0.0108408116997318	53.0945241176369
170	rs1736192	G	A	0.79638	-0.0146205	0.00233894	exposure	TRUE	4.08071828066312e-10	inferred	R29r7e	textfile	19	2784678	A	G	450604	0.201292	-7.76141	6.24046	0.213601	-0.1993	0.160245	0.213601	1	-0.00931167	39.0738574656164
171	rs174544	C	A	0.692528	-0.0425442	0.00202295	exposure	TRUE	3.4302377240253e-98	inferred	R29r7e	textfile	11	61567753	A	C	456306	0.30806	-4.54559	7.25483	0.530947	-0.0863647	0.137839	0.530947	1	-0.0311184	442.293366395764
172	rs17572109	G	A	0.766479	-0.0395689	0.00222158	exposure	TRUE	5.79052161828552e-71	inferred	R29r7e	textfile	2	219093934	A	G	444416	0.229609	-6.66645	6.51319	0.306057	-0.157148	0.153535	0.306057	1	-0.0267081	317.237150637129
173	rs17625587	G	A	0.737282	0.025314	0.00211006	exposure	TRUE	3.69232360875197e-33	inferred	R29r7e	textfile	1	198990494	A	G	452028	0.261482	0.448849	6.85919	0.947826	0.00954013	0.14579	0.947826	1	0.0178408332983192	143.923576297108
174	rs1768584	A	G	0.615227	-0.050733	0.00190281	exposure	TRUE	1.2940725134807e-156	inferred	R29r7e	textfile	1	205240145	G	A	455834	0.385523	-11.4127	7.62286	0.134348	-0.196406	0.131184	0.134348	1	-0.0394598	710.870084525253
175	rs17758695	C	T	0.970687	0.0552586	0.0055868	exposure	TRUE	4.55812782712484e-23	inferred	R29r7e	textfile	18	60920854	T	C	456348	0.0294238	-3.16627	2.6337	0.229281	-0.456473	0.379694	0.229281	1	0.0146400676188681	97.830327282821
176	rs17812917	G	A	0.85561	0.014182	0.00268572	exposure	TRUE	1.28817283329622e-07	inferred	R29r7e	textfile	21	36459698	A	G	455709	0.144015	5.45536	5.52145	0.323137	0.178944	0.181112	0.323137	1	0.00782205042751556	27.883898649196
177	rs1924929	A	G	0.225446	0.0148592	0.00225491	exposure	TRUE	4.40690419365199e-11	inferred	R29r7e	textfile	13	78447374	A	G	455978	0.224533	-2.52559	6.55538	0.700038	-0.0587714	0.152546	0.700038	1	0.00975830851821818	43.4242604894954
178	rs1982101	A	T	0.606124	0.0186447	0.00193491	exposure	TRUE	5.63670293118709e-22	inferred	R29r7e	textfile	15	39300917	T	A	453210	0.393088	5.66066	7.63844	0.458648	0.0970192	0.130917	0.458648	1	0.0143120341289188	92.8515720984888
179	rs1982151	A	G	0.256656	0.0128828	0.00213348	exposure	TRUE	1.55652384745323e-09	inferred	R29r7e	textfile	9	86617265	A	G	456348	0.256301	10.033	6.85199	0.143127	0.213697	0.145943	0.143127	1	0.00893834709179022	36.4622426794468
180	rs198217	T	G	0.469293	-0.00981563	0.00186084	exposure	TRUE	1.32873232998389e-07	inferred	R29r7e	textfile	3	37570470	T	G	456164	0.468709	-3.28302	7.83549	0.675221	-0.0534738	0.127624	0.675221	1	-0.00780974	27.8239185119023
181	rs1997577	A	T	0.845082	0.0211309	0.00262116	exposure	TRUE	7.52654677716375e-16	inferred	R29r7e	textfile	21	16371102	T	A	452327	0.153028	-3.30773	5.61634	0.555896	-0.104863	0.178052	0.555896	1	0.0119858260195472	64.9903574922781
182	rs2015210	T	G	0.24876	0.0225251	0.00217243	exposure	TRUE	3.44465095354508e-25	inferred	R29r7e	textfile	7	130737982	T	G	452522	0.246767	4.09365	6.73374	0.543233	0.0902813	0.148506	0.543233	1	0.0154116970676344	107.508269759367
183	rs2015599	G	A	0.540781	0.0476454	0.00186194	exposure	TRUE	2.01642484182109e-144	inferred	R29r7e	textfile	12	29435480	A	G	456348	0.459498	5.81992	7.80517	0.45588	0.0955326	0.12812	0.45588	1	0.0378526957347589	654.802894904578
184	rs2017058	T	C	0.491321	0.016789	0.00188153	exposure	TRUE	4.53589936658475e-19	inferred	R29r7e	textfile	4	120257739	T	C	456348	0.49003	1.05046	7.80069	0.892878	0.0172629	0.128194	0.892878	1	0.0132077449631811	79.620951563253
185	rs2029466	C	T	0.692902	-0.0421482	0.00202555	exposure	TRUE	3.6422109872833e-96	inferred	R29r7e	textfile	3	56780003	T	C	447623	0.305429	2.83674	7.18777	0.693093	0.0549074	0.139125	0.693093	1	-0.0310864	432.984279172175
186	rs204062	G	C	0.939969	0.0304843	0.0038998	exposure	TRUE	5.41452191359491e-15	inferred	R29r7e	textfile	1	29197719	C	G	456097	0.0597351	4.60461	3.67067	0.209685	0.341745	0.27243	0.209685	1	0.0115738312720735	61.1037387165186
187	rs204570	G	C	0.30163	0.0126922	0.0020595	exposure	TRUE	7.14887413160372e-10	inferred	R29r7e	textfile	13	32720629	G	C	450447	0.300433	-2.50236	7.14216	0.726066	-0.0490557	0.140014	0.726066	1	0.0091819710100783	37.979585562108
188	rs2068888	G	A	0.549396	0.0220268	0.0018838	exposure	TRUE	1.38819803908262e-31	inferred	R29r7e	textfile	10	94839642	A	G	456348	0.450258	0.361088	7.79645	0.96306	0.00594044	0.128264	0.96306	1	0.0173063086421726	136.720372148193
189	rs2070738	T	C	0.692954	0.0119055	0.00203548	exposure	TRUE	4.94569980070645e-09	inferred	R29r7e	textfile	4	100873826	C	T	455843	0.305841	3.78708	7.22612	0.600221	0.0725262	0.138387	0.600221	1	0.00866279049529194	34.2106715766154
190	rs2071985	A	G	0.480903	-0.0192693	0.00186312	exposure	TRUE	4.52621393587418e-25	inferred	R29r7e	textfile	1	7796641	A	G	444531	0.480242	-4.21467	7.72432	0.585316	-0.0706387	0.129461	0.585316	1	-0.0155104	106.967099746493
191	rs210134	A	G	0.311102	-0.0932273	0.0020361	exposure	TRUE	0	inferred	R29r7e	textfile	6	33540209	A	G	456348	0.311556	-14.6657	7.27317	0.0437568	-0.27724	0.13757	0.0438769	1	-0.0676241	2096.46687788102
192	rs210213	C	A	0.330554	0.0348886	0.00201625	exposure	TRUE	4.41069478086009e-67	inferred	R29r7e	textfile	6	33572159	C	A	448600	0.32887	-0.391957	7.29006	0.957122	-0.00737525	0.137173	0.957122	1	0.0258265031884494	299.418289008133
193	rs210798	T	G	0.480339	0.0182978	0.00186586	exposure	TRUE	1.05430101333947e-22	inferred	R29r7e	textfile	6	135514558	T	G	452150	0.480281	1.26121	7.79087	0.871398	0.0207785	0.128355	0.871398	1	0.0145825452717127	96.1700061287018
194	rs211382	G	A	0.693723	0.0122881	0.00203443	exposure	TRUE	1.54047199915824e-09	inferred	R29r7e	textfile	10	32289983	A	G	454400	0.305649	-4.01236	7.20592	0.577655	-0.0772717	0.138775	0.577655	1	0.00895996568702309	36.4824479200677
195	rs211510	A	G	0.534841	0.0145663	0.00186812	exposure	TRUE	6.32436364141807e-15	inferred	R29r7e	textfile	6	11593985	G	A	452595	0.464849	6.80608	7.78628	0.382057	0.112263	0.128431	0.382057	1	0.0115894118325449	60.7979534375944
196	rs2122403	G	A	0.0801512	0.0267891	0.00342602	exposure	TRUE	5.31151959686408e-15	inferred	R29r7e	textfile	12	80347212	G	A	454670	0.0787912	2.84198	4.19612	0.498224	0.161408	0.238316	0.498224	1	0.0115955628970393	61.141552063429
197	rs2146431	G	A	0.30363	-0.040684	0.00204093	exposure	TRUE	2.06183920234175e-88	inferred	R29r7e	textfile	14	103071861	G	A	456185	0.304292	0.581139	7.22625	0.935903	0.0111289	0.138384	0.935903	1	-0.029501	397.366336382902
198	rs214933	C	T	0.682542	0.0138383	0.00200287	exposure	TRUE	4.87273339362148e-12	inferred	R29r7e	textfile	11	17194584	T	C	456152	0.317764	-8.05075	7.29862	0.270005	-0.151132	0.137012	0.270005	1	0.0102294766736064	47.7375317041903
199	rs2155380	A	G	0.727766	-0.0566485	0.00210122	exposure	TRUE	4.37682835187969e-160	inferred	R29r7e	textfile	11	119080037	G	A	455249	0.271168	6.69601	6.92928	0.333877	0.139457	0.144315	0.333877	1	-0.0399252	726.831561340951
200	rs2187416	C	A	0.285455	-0.0129063	0.00208535	exposure	TRUE	6.05344046772551e-10	inferred	R29r7e	textfile	18	52642359	C	A	456348	0.285506	-8.42574	7.06004	0.232697	-0.169041	0.141642	0.232697	1	-0.00916131	38.304129673639
201	rs2193049	C	G	0.298501	-0.0128323	0.00202898	exposure	TRUE	2.54040887930879e-10	inferred	R29r7e	textfile	12	68546922	C	G	453701	0.298786	3.24549	7.18107	0.651305	0.0629364	0.139255	0.651305	1	-0.00938909	39.9993999343912
202	rs2207789	C	G	0.765438	-0.0127445	0.00219801	exposure	TRUE	6.70307706127704e-09	inferred	R29r7e	textfile	1	61906890	G	C	452655	0.232767	-2.44046	6.60068	0.711584	-0.0560139	0.1515	0.711584	1	-0.00861776	33.619114893585
203	rs2236074	G	A	0.638264	0.0223086	0.00193757	exposure	TRUE	1.12543766891126e-30	inferred	R29r7e	textfile	1	28211384	A	G	446420	0.360071	10.8369	7.43623	0.145029	0.195975	0.134477	0.145029	1	0.0172297744892764	132.565291148442
204	rs2241233	C	T	0.139232	0.0231209	0.00278668	exposure	TRUE	1.06832703221334e-16	inferred	R29r7e	textfile	17	7318396	C	T	431064	0.127591	-2.34202	5.06494	0.643795	-0.091294	0.197436	0.643795	1	0.0126361010415886	68.8391135674078
205	rs2242488	A	G	0.390955	-0.014718	0.0019171	exposure	TRUE	1.62577072428061e-14	inferred	R29r7e	textfile	7	129658655	A	G	454541	0.390765	-3.49482	7.64223	0.647453	-0.059839	0.130852	0.647453	1	-0.0113865	58.9397192465524
206	rs2243103	C	G	0.925927	-0.0699136	0.0035794	exposure	TRUE	5.8451807185581e-85	inferred	R29r7e	textfile	17	4839400	G	C	455871	0.0734034	-6.90925	4.07608	0.0900614	-0.415859	0.245334	0.0900614	1	-0.0289168	381.507309620447
207	rs2244625	G	A	0.311551	-0.017293	0.00201553	exposure	TRUE	9.49744343731871e-18	inferred	R29r7e	textfile	11	64026144	G	A	456348	0.310922	3.24905	7.26562	0.654744	0.0615476	0.137635	0.654744	1	-0.0126999	73.6142936787681
208	rs2255531	G	A	0.649043	0.0212577	0.00194749	exposure	TRUE	9.7262835865275e-28	inferred	R29r7e	textfile	12	121414915	A	G	452776	0.349464	6.18205	7.44785	0.406514	0.111447	0.134267	0.406514	1	0.0162197129133747	119.146715542992
209	rs2260230	T	A	0.706378	-0.028813	0.00205603	exposure	TRUE	1.28167736169413e-44	inferred	R29r7e	textfile	7	2822986	A	T	454721	0.293894	-10.8608	7.14736	0.128624	-0.212603	0.139912	0.128624	1	-0.0207775	196.389409336656
210	rs2273215	G	A	0.541867	0.0126769	0.00187617	exposure	TRUE	1.41075539636464e-11	inferred	R29r7e	textfile	6	170586082	A	G	448898	0.458223	-9.52259	7.74722	0.219011	-0.158659	0.129079	0.219011	1	0.0100843039187609	45.6543069417564
211	rs2274319	T	C	0.346615	0.0224923	0.00194755	exposure	TRUE	7.46642450435669e-31	inferred	R29r7e	textfile	1	156450873	T	C	455406	0.346626	-1.19013	7.47262	0.87346	-0.0213132	0.133822	0.87346	1	0.017111309293621	133.379935294854
212	rs2285883	G	A	0.800955	0.0148113	0.00235102	exposure	TRUE	2.97748577110385e-10	inferred	R29r7e	textfile	14	69043970	A	G	456348	0.199019	3.73165	6.23679	0.549621	0.0959352	0.160339	0.549621	1	0.0093254725041805	39.689324721505
213	rs2290202	G	T	0.870532	0.0316557	0.00280819	exposure	TRUE	1.79128183254431e-29	inferred	R29r7e	textfile	15	91512267	T	G	454436	0.128541	-6.56688	5.24475	0.210538	-0.238731	0.190667	0.210538	1	0.0167197320268337	127.072292773015
214	rs2297066	C	G	0.758218	-0.0533193	0.00219318	exposure	TRUE	1.48481749609715e-130	inferred	R29r7e	textfile	14	103566835	G	C	456348	0.241847	-4.8632	6.72928	0.469869	-0.107395	0.148604	0.469869	1	-0.0359652	591.044696453271
215	rs2301984	A	G	0.859104	-0.024476	0.0026789	exposure	TRUE	6.44550209815056e-20	inferred	R29r7e	textfile	2	74721055	G	A	456027	0.140322	0.478939	5.44529	0.929913	0.0161524	0.183645	0.929913	1	-0.0135285	83.4772021296979
216	rs2305769	G	C	0.76992	-0.0141605	0.00225068	exposure	TRUE	3.14100829207618e-10	inferred	R29r7e	textfile	19	17264961	C	G	443525	0.22586	-2.78866	6.47049	0.666483	-0.0666071	0.154548	0.666483	1	-0.00944686	39.5849110356875
217	rs2310998	G	A	0.451216	0.0125651	0.0018885	exposure	TRUE	2.86239616653745e-11	inferred	R29r7e	textfile	17	76142402	G	A	454245	0.451731	5.66608	7.78874	0.466938	0.0934003	0.12839	0.466938	1	0.00987151198399417	44.2688173902645
218	rs2331174	G	A	0.566187	0.0308929	0.0018905	exposure	TRUE	5.03144926966243e-60	inferred	R29r7e	textfile	7	44926827	A	G	449924	0.433553	-9.14509	7.72331	0.236378	-0.153314	0.129478	0.236378	1	0.0243547985513614	267.032421369924
219	rs234055	G	T	0.287932	-0.0155427	0.00205335	exposure	TRUE	3.74850060253365e-14	inferred	R29r7e	textfile	3	172310820	G	T	453823	0.286998	-1.97926	7.09427	0.78025	-0.0393266	0.140959	0.78025	1	-0.0112355	57.2963509580707
220	rs2347618	T	C	0.658654	0.0114378	0.00196903	exposure	TRUE	6.29033980781013e-09	inferred	R29r7e	textfile	1	164687297	C	T	441263	0.339539	-8.49266	7.29431	0.244308	-0.159615	0.137093	0.244308	1	0.00874431488708224	33.7427388210681
221	rs2347784	C	G	0.729275	-0.0132692	0.00210978	exposure	TRUE	3.18744298177401e-10	inferred	R29r7e	textfile	7	6524843	G	C	453522	0.270666	6.24226	6.96189	0.369915	0.128792	0.143639	0.369915	1	-0.00933879	39.5562522742276
222	rs2480009	G	C	0.332852	-0.013012	0.00196942	exposure	TRUE	3.92129490436645e-11	inferred	R29r7e	textfile	6	22904166	G	C	455960	0.333367	-1.39665	7.38226	0.849944	-0.0256277	0.13546	0.849944	1	-0.00978414	43.6527312057957
223	rs2494663	C	A	0.449945	0.0177358	0.00186522	exposure	TRUE	1.93077327484726e-21	inferred	R29r7e	textfile	1	154092056	C	A	452047	0.449166	-1.54739	7.75525	0.84185	-0.025728	0.128945	0.84185	1	0.0141412062374651	90.4152
224	rs251022	T	C	0.471766	-0.00923588	0.00186951	exposure	TRUE	7.80153593341594e-07	inferred	R29r7e	textfile	5	140892643	T	C	456348	0.471442	-10.9381	7.84146	0.163046	-0.177888	0.127527	0.163046	1	-0.00731294	24.4062
225	rs2513094	T	C	0.762306	0.0129776	0.00219345	exposure	TRUE	3.28816118630899e-09	inferred	R29r7e	textfile	11	116806412	C	T	454892	0.236769	-2.51087	6.64518	0.705543	-0.0568605	0.150485	0.705543	1	0.00877196197913131	35.0052585741739
226	rs2520099	T	C	0.729393	-0.0341122	0.00210517	exposure	TRUE	4.7241821808318e-59	inferred	R29r7e	textfile	9	136918139	C	T	451603	0.268366	2.50459	6.8881	0.716149	0.0527883	0.145178	0.716149	1	-0.0241057	262.570005788409
227	rs2525574	T	C	0.383586	-0.0193267	0.0019239	exposure	TRUE	9.60764029511063e-24	inferred	R29r7e	textfile	17	29705947	T	C	456348	0.383702	0.425103	7.62351	0.955531	0.0073145	0.131173	0.955531	1	-0.0148689	100.913767742481
228	rs2540436	C	A	0.609993	0.0149678	0.00190867	exposure	TRUE	4.43408119851116e-15	inferred	R29r7e	textfile	2	202352867	A	C	454365	0.389195	2.22714	7.63136	0.770409	0.0382422	0.131038	0.770409	1	0.0116331212970171	61.4970450220158
229	rs2546979	G	C	0.299509	0.0410455	0.00204584	exposure	TRUE	1.55705848249101e-89	inferred	R29r7e	textfile	5	159595612	G	C	453538	0.298226	-8.59594	7.15232	0.229426	-0.168035	0.139815	0.229426	1	0.0297779890576545	402.520283247126
230	rs2608627	C	T	0.354513	0.0260399	0.0019441	exposure	TRUE	6.52699777551301e-41	inferred	R29r7e	textfile	6	52625041	C	T	455837	0.354145	-2.78361	7.47122	0.709463	-0.0498684	0.133847	0.709463	1	0.0198349645942978	179.407842545688
231	rs263527	T	C	0.497249	0.0244246	0.00185088	exposure	TRUE	9.22622118518743e-40	inferred	R29r7e	textfile	1	2172988	T	C	455819	0.497202	-8.44117	7.83854	0.281533	-0.137383	0.127575	0.281533	1	0.0195420893803418	174.139941754763
232	rs2643826	C	T	0.547898	0.0136699	0.00187312	exposure	TRUE	2.92227017860085e-13	inferred	R29r7e	textfile	3	27562988	T	C	450809	0.45196	14.31	7.75647	0.0650507	0.237854	0.128925	0.0650507	1	0.0108687289463874	53.2597928699224
233	rs2648718	A	C	0.727412	0.0118706	0.00210443	exposure	TRUE	1.69293996862733e-08	inferred	R29r7e	textfile	10	93011770	C	A	456348	0.273331	2.89731	6.99342	0.678661	0.05924	0.142991	0.678661	1	0.00834979710849788	31.8182561126245
234	rs2700934	T	C	0.537613	-0.0181178	0.0018816	exposure	TRUE	6.03529953560713e-22	inferred	R29r7e	textfile	7	36083020	C	T	451704	0.462227	10.7453	7.77115	0.16675	0.17793	0.128681	0.16675	1	-0.0143254	92.7163473123359
235	rs2721971	A	T	0.492715	-0.0119345	0.00188579	exposure	TRUE	2.47319516981165e-10	inferred	R29r7e	textfile	8	101487464	A	T	451954	0.491937	1.99802	7.79489	0.7977	0.0328837	0.128289	0.7977	1	-0.00941338	40.0517780447719
236	rs2724564	G	T	0.441154	-0.0236967	0.00189135	exposure	TRUE	5.1820178145537e-36	inferred	R29r7e	textfile	4	152349962	G	T	454813	0.439901	-0.471803	7.76022	0.95152	-0.00783454	0.128862	0.95152	1	-0.0185749	156.975521043148
237	rs2735207	C	T	0.596576	0.0198618	0.00190539	exposure	TRUE	1.92659845383046e-25	inferred	R29r7e	textfile	11	113997675	T	C	455507	0.403652	-3.24138	7.68676	0.673256	-0.0548585	0.130094	0.673256	1	0.0154431665297814	108.659936184966
238	rs2755214	T	G	0.692385	-0.0229098	0.00203708	exposure	TRUE	2.41260689693164e-29	inferred	R29r7e	textfile	13	41149345	G	T	455717	0.30727	-11.2313	7.23359	0.120505	-0.214645	0.138244	0.120505	1	-0.0166574	126.481330639728
239	rs2780226	C	T	0.0894951	-0.0307016	0.00325922	exposure	TRUE	4.51420846171018e-21	inferred	R29r7e	textfile	6	34199092	C	T	456348	0.0889968	2.9935	4.48447	0.504436	0.148853	0.222992	0.504436	1	-0.0139431	88.7349410016956
240	rs2780817	G	A	0.712448	0.0140662	0.00205027	exposure	TRUE	6.85443833825778e-12	inferred	R29r7e	textfile	1	65307961	A	G	452041	0.28604	-2.95778	7.03755	0.674277	-0.0597205	0.142095	0.674277	1	0.0102036409722726	47.0686196422971
241	rs278853	T	C	0.263544	-0.0130934	0.00209942	exposure	TRUE	4.46969555398199e-10	inferred	R29r7e	textfile	1	78130243	T	C	454923	0.262949	0.365314	6.89806	0.957765	0.00767737	0.144968	0.957765	1	-0.00924627	38.8961136980308
242	rs2799407	C	T	0.29939	0.015925	0.00202225	exposure	TRUE	3.41037786596955e-15	inferred	R29r7e	textfile	1	236708788	C	T	456267	0.298243	4.92169	7.16808	0.492327	0.0957874	0.139507	0.492327	1	0.0116575290760465	62.013921309142
243	rs2818866	C	T	0.565256	-0.0105637	0.00187817	exposure	TRUE	1.86084596660858e-08	inferred	R29r7e	textfile	6	147493989	T	C	454218	0.434426	16.1663	7.75325	0.0370606	0.268932	0.129103	0.0372437	1	-0.00834516	31.6345979772115
244	rs28360656	T	C	0.757631	0.0210074	0.00219972	exposure	TRUE	1.29654181181785e-21	inferred	R29r7e	textfile	22	30717739	C	T	456008	0.241899	8.77354	6.70134	0.190459	0.195367	0.149224	0.190459	1	0.014140872186306	91.2031425374545
245	rs28362951	A	G	0.732861	-0.0256038	0.00212361	exposure	TRUE	1.78731827205345e-33	inferred	R29r7e	textfile	11	57372526	G	A	454841	0.266893	14.6092	6.95665	0.0357253	0.301875	0.14363	0.0355747	1	-0.0178744	145.36482464381
246	rs2836997	G	A	0.692191	0.020431	0.00206023	exposure	TRUE	3.51666109733559e-23	inferred	R29r7e	textfile	21	40751811	A	G	444495	0.305241	-2.64226	7.13735	0.711232	-0.0518683	0.140108	0.711232	1	0.0148728232059267	98.3439921365478
247	rs28407694	C	T	0.645008	0.0181066	0.00196223	exposure	TRUE	2.76860242250232e-20	inferred	R29r7e	textfile	8	66861738	T	C	454784	0.353828	6.0613	7.48299	0.417934	0.108247	0.133636	0.417934	1	0.0136818463985325	85.1479100264657
248	rs28436034	A	G	0.796091	-0.0449085	0.00274068	exposure	TRUE	2.4118491214939e-60	inferred	R29r7e	textfile	6	31377975	G	A	441833	0.19667	-0.444435	6.10375	0.941955	-0.0119293	0.163834	0.941955	1	-0.0246439	268.497618223154
249	rs28505677	C	G	0.764041	0.0313182	0.0022249	exposure	TRUE	5.31730302706181e-45	inferred	R29r7e	textfile	10	50259007	G	C	446544	0.23347	-1.72484	6.57168	0.792963	-0.0399388	0.152168	0.792963	1	0.0210600214462112	198.140198792488
250	rs28582096	G	A	0.794814	0.0287598	0.00230218	exposure	TRUE	8.21170124674155e-36	inferred	R29r7e	textfile	12	123856998	A	G	454917	0.204205	-5.11799	6.29294	0.416051	-0.129239	0.158908	0.416051	1	0.0185185498846781	156.060563147549
251	rs2896907	C	T	0.82493	-0.0185165	0.00247789	exposure	TRUE	7.85727214262795e-14	inferred	R29r7e	textfile	16	4640051	T	C	453745	0.174123	-1.96773	5.94173	0.740515	-0.0557366	0.168301	0.740515	1	-0.0110929	55.8410727710641
252	rs2900177	C	T	0.303134	-0.0185035	0.00203486	exposure	TRUE	9.61178583202028e-20	inferred	R29r7e	textfile	9	123497645	C	T	451700	0.302172	-1.89795	7.16562	0.791111	-0.0369638	0.139555	0.791111	1	-0.0135287	82.6872787256783
253	rs2915607	T	C	0.257803	-0.0193226	0.0021472	exposure	TRUE	2.27833934117003e-19	inferred	R29r7e	textfile	8	30279916	T	C	456008	0.257906	0.298882	6.85333	0.965214	0.00636351	0.145915	0.965214	1	-0.0133251	80.9815584268342
254	rs2934701	A	T	0.573404	0.0194628	0.00190519	exposure	TRUE	1.68702549817464e-24	inferred	R29r7e	textfile	14	51133287	T	A	450381	0.426288	-5.33467	7.69511	0.48815	-0.0900903	0.129953	0.48815	1	0.0152204555019812	104.359995831283
255	rs2977474	C	T	0.876707	0.0156946	0.00286105	exposure	TRUE	4.1204871584959e-08	inferred	R29r7e	textfile	8	141552183	T	C	454008	0.122373	2.91484	5.13828	0.570524	0.110403	0.194618	0.570524	1	0.00814103488013693	30.0918998524581
256	rs2979249	T	C	0.0884329	-0.0194	0.00339087	exposure	TRUE	1.05745917906133e-08	inferred	R29r7e	textfile	8	8915489	T	C	448130	0.084519	0.285892	4.33104	0.94737	0.0152411	0.230891	0.94737	1	-0.00854621	32.7326509871602
257	rs2980685	A	G	0.473106	-0.0104884	0.00188882	exposure	TRUE	2.8099315433584e-08	inferred	R29r7e	textfile	8	6583652	A	G	447286	0.47304	-2.56631	7.74548	0.740395	-0.0427772	0.129108	0.740395	1	-0.00830256	30.834530378573
258	rs2993498	T	C	0.481835	-0.0101315	0.0018693	exposure	TRUE	5.9617942718335e-08	inferred	R29r7e	textfile	1	3023395	T	C	441862	0.482002	16.9885	7.70532	0.0274701	0.286136	0.129937	0.0276565	1	-0.00815339	29.3757853132246
259	rs2999154	G	T	0.474174	0.031506	0.00185262	exposure	TRUE	7.38946937940882e-65	inferred	R29r7e	textfile	1	113222456	G	T	455419	0.474313	-6.238	7.83426	0.425889	-0.101637	0.127645	0.425889	1	0.0251921043702954	289.210356624488
260	rs301714	G	C	0.0551957	-0.0232546	0.00418256	exposure	TRUE	2.69934941393173e-08	inferred	R29r7e	textfile	5	88224419	G	C	448276	0.051833	1.45666	3.43044	0.671108	0.123782	0.291508	0.671108	1	-0.00830386	30.9124472162864
261	rs303968	T	C	0.601431	0.0180315	0.00193068	exposure	TRUE	9.68307676372339e-21	inferred	R29r7e	textfile	13	72340143	C	T	447555	0.396832	-1.46161	7.61425	0.847776	-0.0252103	0.131333	0.847776	1	0.0139590867296196	87.2254295711088
262	rs3057	C	T	0.448706	-0.0175582	0.00188996	exposure	TRUE	1.53927032423429e-20	inferred	R29r7e	textfile	8	131329837	C	T	452484	0.448891	0.811592	7.77048	0.916816	0.0134413	0.128692	0.916816	1	-0.0138097	86.3087363127674
263	rs3122414	G	A	0.332858	0.0130456	0.00196411	exposure	TRUE	3.09474874595443e-11	inferred	R29r7e	textfile	1	40520931	G	A	456217	0.33295	4.39895	7.37782	0.551015	0.0808152	0.135541	0.551015	1	0.00983314569487252	44.1160380661656
264	rs326217	T	C	0.705305	0.0152663	0.00204794	exposure	TRUE	9.02322403918292e-14	inferred	R29r7e	textfile	11	47303275	C	T	456348	0.294074	-2.44887	7.14633	0.731843	-0.0479512	0.139932	0.731843	1	0.0110342545739732	55.5690698968337
265	rs337605	C	T	0.412194	-0.0149121	0.00190964	exposure	TRUE	5.77102921356077e-15	inferred	R29r7e	textfile	4	38647753	C	T	452748	0.411345	-1.50252	7.68428	0.844976	-0.0254457	0.130136	0.844976	1	-0.0116046	60.978201181297
266	rs34166762	T	C	0.715633	0.018319	0.00207324	exposure	TRUE	9.92704313469434e-19	inferred	R29r7e	textfile	7	73018524	C	T	455219	0.284748	-11.3378	7.07164	0.108874	-0.226719	0.14141	0.108874	1	0.0130950061812146	78.0736290191278
267	rs34172643	G	A	0.650647	0.0109152	0.00194392	exposure	TRUE	1.96510089267024e-08	inferred	R29r7e	textfile	1	52334960	A	G	455400	0.350142	-8.46344	7.47421	0.257486	-0.151501	0.133793	0.257486	1	0.00832037148418568	31.5287403093199
268	rs34174712	T	C	0.456061	0.0165553	0.00187063	exposure	TRUE	8.74252320569054e-19	inferred	R29r7e	textfile	2	242631579	T	C	454079	0.456527	15.5683	7.79609	0.0458318	0.256146	0.128269	0.0458318	1	0.0131324862534625	78.3246242452772
269	rs34232231	A	G	0.903802	-0.0306555	0.00314614	exposure	TRUE	1.95995207815008e-22	inferred	R29r7e	textfile	1	26994762	G	A	454930	0.0957224	-4.42978	4.59771	0.335309	-0.209556	0.2175	0.335309	1	-0.0144449	94.9425122355342
270	rs34346558	A	C	0.794081	-0.0202485	0.00232065	exposure	TRUE	2.6534192980952e-18	inferred	R29r7e	textfile	10	11904834	C	A	454784	0.204814	-13.4601	6.32015	0.0331953	-0.336972	0.158216	0.0331859	1	-0.0129373	76.1318568675643
271	rs34372369	G	A	0.948278	-0.0214696	0.00422439	exposure	TRUE	3.72899892765586e-07	inferred	R29r7e	textfile	7	143092269	A	G	456348	0.0516821	1.35064	3.45786	0.696092	0.11296	0.289196	0.696092	1	-0.00752316	25.8297316704963
272	rs34592828	G	A	0.955026	0.152248	0.00450733	exposure	TRUE	4.16868869795474e-250	inferred	R29r7e	textfile	5	75996909	A	G	456348	0.0451925	-1.28868	3.28213	0.694588	-0.119629	0.30468	0.694588	1	0.0499393503173233	1140.94440001203
273	rs34750619	G	A	0.92989	-0.0418574	0.00369186	exposure	TRUE	8.53058742453628e-30	inferred	R29r7e	textfile	14	93514882	A	G	455445	0.069611	-6.96907	3.97332	0.0794362	-0.441436	0.251679	0.0794362	1	-0.0167977	128.544662801356
274	rs34825969	G	A	0.865576	-0.033517	0.00276879	exposure	TRUE	9.90213858256673e-34	inferred	R29r7e	textfile	21	39846142	A	G	455611	0.134407	-2.34896	5.3624	0.661356	-0.0816876	0.186484	0.661356	1	-0.0179312	146.537994401777
275	rs35148399	T	C	0.970235	-0.0411235	0.00553916	exposure	TRUE	1.13514937703833e-13	inferred	R29r7e	textfile	10	30072021	C	T	455707	0.0289133	0.974738	2.60945	0.708745	0.14315	0.383223	0.708745	1	-0.0109971	55.1178565559755
276	rs35267052	T	G	0.897077	-0.0291834	0.0030804	exposure	TRUE	2.69587340959312e-21	inferred	R29r7e	textfile	5	87949118	G	T	454822	0.101996	-0.218624	4.74777	0.963272	-0.00969881	0.210625	0.963272	1	-0.0140464	89.7547716143088
277	rs35316247	T	C	0.848422	-0.018964	0.00262127	exposure	TRUE	4.66693191183946e-13	inferred	R29r7e	textfile	8	103268149	C	T	454989	0.151168	5.66631	5.62571	0.31383	0.179038	0.177755	0.31383	1	-0.0107249	52.3403206710412
278	rs35330522	G	A	0.523129	-0.019219	0.00187391	exposure	TRUE	1.11108825702073e-24	inferred	R29r7e	textfile	2	12877060	A	G	446111	0.476313	4.98983	7.73349	0.518783	0.0834323	0.129308	0.518783	1	-0.0153536	105.187495798275
279	rs35659984	T	C	0.826754	0.0198053	0.00246565	exposure	TRUE	9.55168575162448e-16	inferred	R29r7e	textfile	3	124347443	C	T	453602	0.172942	2.33396	5.92466	0.693625	0.0664915	0.168786	0.693625	1	0.0119256645385059	64.5208371657154
280	rs363096	T	C	0.424981	0.0156012	0.00190075	exposure	TRUE	2.25056959495587e-16	inferred	R29r7e	textfile	4	3180021	T	C	453052	0.425035	10.0545	7.72213	0.192904	0.168611	0.129498	0.192904	1	0.0121934794239096	67.3699166985681
281	rs3764535	G	A	0.517608	-0.020278	0.00187711	exposure	TRUE	3.33949301321161e-27	inferred	R29r7e	textfile	19	58929052	A	G	456348	0.482968	-0.687421	7.8406	0.930135	-0.0111821	0.127541	0.930135	1	-0.0159894	116.699982457972
282	rs3767809	T	C	0.776795	-0.0409249	0.00222585	exposure	TRUE	1.694811021772e-75	inferred	R29r7e	textfile	1	118154831	C	T	455293	0.222344	6.90707	6.49686	0.287719	0.163639	0.153921	0.287719	1	-0.0272387	338.051966005512
283	rs3771258	C	T	0.386807	0.011243	0.00191216	exposure	TRUE	4.10916131532903e-09	inferred	R29r7e	textfile	2	61764140	C	T	455059	0.387053	-11.9005	7.6352	0.119084	-0.204137	0.130972	0.119084	1	0.00871582668288423	34.5713200920221
284	rs3771529	G	A	0.806407	0.0333825	0.00236692	exposure	TRUE	3.60001424956845e-45	inferred	R29r7e	textfile	2	70164840	A	G	449585	0.192133	4.72376	6.11974	0.44018	0.126131	0.163406	0.44018	1	0.0210297583862517	198.916384362941
285	rs3780961	G	A	0.467979	-0.013864	0.0018844	exposure	TRUE	1.87738972671229e-13	inferred	R29r7e	textfile	10	17195132	G	A	453552	0.468311	-13.6517	7.77809	0.0792335	-0.225653	0.128566	0.0792335	1	-0.0109239	54.1291127261871
286	rs3787091	G	T	0.240453	-0.0172237	0.00220694	exposure	TRUE	5.9815911713969e-15	inferred	R29r7e	textfile	20	62315594	G	T	451021	0.239025	5.94447	6.6659	0.372515	0.133781	0.150017	0.372515	1	-0.0116201	60.9076512643059
287	rs3801471	T	G	0.708795	-0.0127295	0.0020661	exposure	TRUE	7.22300255745617e-10	inferred	R29r7e	textfile	7	75696188	G	T	450041	0.290021	4.3871	7.08159	0.535582	0.0874815	0.141211	0.535582	1	-0.00918368	37.9594591036698
288	rs3804749	C	T	0.40871	0.0376969	0.00190123	exposure	TRUE	1.71926168102067e-87	inferred	R29r7e	textfile	3	122833003	C	T	448062	0.407291	-0.794593	7.6301	0.917059	-0.0136485	0.13106	0.917059	1	0.0296082300648096	393.135224597216
289	rs3807999	G	A	0.76475	0.0322758	0.00221156	exposure	TRUE	3.06080650782307e-48	inferred	R29r7e	textfile	7	116503489	A	G	452798	0.234289	-8.09183	6.60684	0.220664	-0.185378	0.151358	0.220664	1	0.0216832750875136	212.988707760474
290	rs381500	C	A	0.547668	-0.0272568	0.0018699	exposure	TRUE	3.95692388975923e-48	inferred	R29r7e	textfile	6	164478388	A	C	454032	0.451755	4.8472	7.7833	0.533436	0.0800136	0.12848	0.533436	1	-0.0216278	212.477511711689
291	rs387582	C	A	0.498616	-0.089765	0.00187207	exposure	TRUE	0	inferred	R29r7e	textfile	9	4743973	C	A	452360	0.497469	-0.707721	7.78395	0.927556	-0.0116805	0.12847	0.927556	1	-0.071112	2299.16374715192
292	rs3887841	T	C	0.769332	0.0139077	0.00220643	exposure	TRUE	2.91451040857873e-10	inferred	R29r7e	textfile	3	128109941	C	T	455324	0.230402	3.38097	6.59358	0.608114	0.0777678	0.151663	0.608114	1	0.00934086070054064	39.7310754187834
293	rs3901421	G	C	0.512798	0.0128542	0.00186645	exposure	TRUE	5.69900502259545e-12	inferred	R29r7e	textfile	9	96204538	C	G	455476	0.487126	-5.84032	7.81044	0.454606	-0.0957383	0.128034	0.454606	1	0.0102040901280753	47.430465322327
294	rs3937015	T	C	0.0192967	-0.0435447	0.00689077	exposure	TRUE	2.62786007108891e-10	inferred	R29r7e	textfile	18	67599516	T	C	455705	0.0188883	-2.64499	2.13743	0.215915	-0.578951	0.467852	0.215915	1	-0.00936068	39.9333
295	rs3956381	C	A	0.419795	-0.0153417	0.00195624	exposure	TRUE	4.41865570667765e-15	inferred	R29r7e	textfile	13	95972874	C	A	414185	0.416813	-1.75409	7.3418	0.811169	-0.0325422	0.136206	0.811169	1	-0.0121849	61.5039066412788
296	rs4020453	C	T	0.841643	-0.0286015	0.0025432	exposure	TRUE	2.41609158033753e-29	inferred	R29r7e	textfile	12	93807934	T	C	455838	0.158175	-9.44578	5.69123	0.0969733	-0.291625	0.175709	0.0969733	1	-0.016655	126.478466297101
297	rs4020660	G	A	0.536841	0.0211077	0.00190595	exposure	TRUE	1.66558017750436e-28	inferred	R29r7e	textfile	12	6511657	A	G	412314	0.462492	-4.83358	7.38855	0.512984	-0.0885423	0.135345	0.512984	1	0.017244548919529	122.647533663314
298	rs406079	A	T	0.702406	-0.0109296	0.00205437	exposure	TRUE	1.03669680197823e-07	inferred	R29r7e	textfile	8	81397423	T	A	455393	0.296748	-4.94629	7.15829	0.489574	-0.0965296	0.139698	0.489574	1	-0.00788351	28.3042210371916
299	rs4074838	G	A	0.80401	-0.0345296	0.00235471	exposure	TRUE	1.09529385679961e-48	inferred	R29r7e	textfile	7	100032665	A	G	456348	0.195893	-4.72849	6.25165	0.449434	-0.120986	0.159958	0.449434	1	-0.0217022	215.034547042864
300	rs4076566	G	A	0.572682	0.0158148	0.00192292	exposure	TRUE	1.96224221945004e-16	inferred	R29r7e	textfile	22	50723474	A	G	438226	0.425543	1.87406	7.60477	0.805348	0.032405	0.131496	0.805348	1	0.0124228400625944	67.6402143330087
301	rs41307187	T	C	0.747035	0.0168594	0.00219814	exposure	TRUE	1.72200096545408e-14	inferred	R29r7e	textfile	20	42839175	C	T	433345	0.246877	-5.11898	6.59129	0.437378	-0.117826	0.151715	0.437378	1	0.0116504150294012	58.8265705572391
302	rs41375145	A	G	0.901828	0.0227192	0.00315433	exposure	TRUE	5.90994463769906e-13	inferred	R29r7e	textfile	4	124729077	G	A	456348	0.0979286	-1.03125	4.65107	0.82453	-0.0476713	0.215004	0.82453	1	0.0106613966349319	51.8766
303	rs4148445	C	T	0.0842226	-0.0673554	0.00339404	exposure	TRUE	1.21247061342776e-87	inferred	R29r7e	textfile	13	95897359	C	T	456275	0.083305	0.123794	4.28596	0.976957	0.00673913	0.23332	0.976957	1	-0.0293667	393.831932541667
304	rs4149057	T	C	0.373156	0.00995453	0.00191957	exposure	TRUE	2.15075173033897e-07	inferred	R29r7e	textfile	12	21331599	T	C	456348	0.372843	-8.1196	7.57773	0.283941	-0.141402	0.131966	0.283941	1	0.00767638742882647	26.8926507414695
305	rs42039	C	T	0.75561	0.0154246	0.00217865	exposure	TRUE	1.44270054130169e-12	inferred	R29r7e	textfile	7	92244422	T	C	455522	0.244174	-10.9915	6.73484	0.102672	-0.242328	0.148482	0.102672	1	0.0104893560135081	50.1248271484088
306	rs4286082	C	T	0.287661	0.0190927	0.00208152	exposure	TRUE	4.62260771651927e-20	inferred	R29r7e	textfile	15	42226255	C	T	453877	0.28693	-14.8843	7.08122	0.0355583	-0.296833	0.141181	0.03551	1	0.0136137691171745	84.1343843303718
307	rs4298239	G	A	0.859776	-0.017379	0.00268875	exposure	TRUE	1.02242046862511e-10	inferred	R29r7e	textfile	5	74382081	A	G	456248	0.139793	4.9349	5.42463	0.36297	0.167702	0.184344	0.36297	1	-0.00956874	41.7781033245216
308	rs4327354	T	G	0.527112	0.0114475	0.00186873	exposure	TRUE	9.02188474737535e-10	inferred	R29r7e	textfile	3	142667097	G	T	447314	0.472611	-8.92308	7.73268	0.248523	-0.149229	0.129321	0.248523	1	0.00915884277837133	37.5256470139469
309	rs4357501	C	T	0.385206	0.0151541	0.00190843	exposure	TRUE	2.01187929284931e-15	inferred	R29r7e	textfile	1	213948225	C	T	453433	0.384082	0.605569	7.59002	0.936408	0.0105118	0.131752	0.936408	1	0.0117914744853385	63.0533009668422
310	rs4378991	T	G	0.166478	0.0139789	0.00250428	exposure	TRUE	2.37763441920954e-08	inferred	R29r7e	textfile	3	88132979	T	G	449502	0.16265	-10.0644	5.76557	0.0808799	-0.302764	0.173443	0.0808799	1	0.0083254978524964	31.1587643000434
311	rs4388979	G	T	0.41676	0.0423321	0.00188707	exposure	TRUE	1.88767644842139e-111	inferred	R29r7e	textfile	12	109475012	G	T	455727	0.417007	3.50626	7.71084	0.649312	0.0589714	0.129688	0.649312	1	0.0332116710149013	503.226619175783
312	rs4434040	C	T	0.785903	0.0138352	0.00229205	exposure	TRUE	1.57816467322521e-09	inferred	R29r7e	textfile	2	43127816	T	C	443441	0.209498	-5.53998	6.29617	0.378915	-0.139751	0.158827	0.378915	1	0.00906413927271018	36.4353301054833
313	rs4434553	A	G	0.506317	-0.0213117	0.00187042	exposure	TRUE	4.47573716049813e-30	inferred	R29r7e	textfile	7	100240191	G	A	456348	0.493573	-8.68313	7.84249	0.268211	-0.141179	0.127511	0.268211	1	-0.0168644	129.824874910744
314	rs4477285	G	A	0.57917	-0.0188239	0.00188633	exposure	TRUE	1.88141316042323e-23	inferred	R29r7e	textfile	1	94876928	A	G	441515	0.420365	1.93347	7.60961	0.799431	0.0333897	0.131413	0.799431	1	-0.0150166	99.5826938830988
315	rs449454	A	G	0.382525	-0.0249301	0.00192564	exposure	TRUE	2.46242511923619e-38	inferred	R29r7e	textfile	5	141533062	A	G	454454	0.382885	15.294	7.60899	0.0444318	0.264161	0.13145	0.0444747	1	-0.019201	167.609196369686
316	rs455660	T	C	0.185936	0.011706	0.00240669	exposure	TRUE	1.15070783975749e-06	inferred	R29r7e	textfile	5	55816888	T	C	452635	0.184822	-1.6178	6.05621	0.789369	-0.0441085	0.16512	0.789369	1	0.00722942755424265	23.6579294674107
317	rs4570592	G	A	0.477918	0.0293711	0.0018724	exposure	TRUE	1.87567579936458e-55	inferred	R29r7e	textfile	11	126287785	G	A	453485	0.478424	-5.12834	7.80938	0.51138	-0.0840899	0.128051	0.51138	1	0.0232875221603884	246.061212061527
318	rs45817	C	T	0.917091	0.0207	0.0034066	exposure	TRUE	1.2288006468818e-09	inferred	R29r7e	textfile	5	98307861	T	C	455721	0.0831693	-4.37876	4.30675	0.309287	-0.236076	0.232193	0.309287	1	0.0090008400184831	36.9231212756045
319	rs458857	C	A	0.456045	-0.0130783	0.00187628	exposure	TRUE	3.16187346525346e-12	inferred	R29r7e	textfile	5	34654441	C	A	456237	0.456496	7.85294	7.81381	0.314893	0.128619	0.127979	0.314893	1	-0.010319	48.5855688694984
320	rs4630833	T	C	0.736762	0.0329073	0.00214163	exposure	TRUE	2.78709612094743e-53	inferred	R29r7e	textfile	20	1930798	C	T	454588	0.261534	-9.04687	6.85159	0.1867	-0.192715	0.145952	0.1867	1	0.0227838456173608	236.099798969106
321	rs4632126	A	G	0.786988	0.0155342	0.00230473	exposure	TRUE	1.58235443399626e-11	inferred	R29r7e	textfile	16	50151358	G	A	450537	0.210543	-2.19674	6.34397	0.729138	-0.0545829	0.15763	0.729138	1	0.0100411319708816	45.4294704787003
322	rs4633690	C	T	0.541049	-0.011121	0.00189149	exposure	TRUE	4.11527912269277e-09	inferred	R29r7e	textfile	15	85361960	T	C	455296	0.459075	6.94637	7.79741	0.373006	0.11425	0.128248	0.373006	1	-0.00871319	34.5684241695456
323	rs4645631	G	C	0.864506	-0.0153483	0.00272473	exposure	TRUE	1.7714070839218e-08	inferred	R29r7e	textfile	9	19065152	C	G	456348	0.135669	-0.148341	5.34869	0.977874	-0.00518522	0.186962	0.977874	1	-0.00833824	31.7302586182875
324	rs4651254	T	C	0.337328	0.0162306	0.00196266	exposure	TRUE	1.34301907397806e-16	inferred	R29r7e	textfile	1	185341597	T	C	450989	0.336233	-5.67506	7.36218	0.440802	-0.104703	0.135829	0.440802	1	0.0123133029835273	68.3878588590615
325	rs4659357	G	A	0.834439	0.0161659	0.00249155	exposure	TRUE	8.68158119998526e-11	inferred	R29r7e	textfile	1	25900240	A	G	456348	0.165288	-3.35928	5.80305	0.56267	-0.0997545	0.172323	0.56267	1	0.00960424269715712	42.0979125953519
326	rs4669320	A	C	0.629836	-0.0100378	0.00194872	exposure	TRUE	2.59141408292244e-07	inferred	R29r7e	textfile	2	8785203	C	A	437937	0.367288	-2.87022	7.40907	0.698466	-0.0522862	0.13497	0.698466	1	-0.00778343	26.5325011478976
327	rs4670779	C	T	0.688705	0.0195111	0.00201152	exposure	TRUE	3.02446162069084e-22	inferred	R29r7e	textfile	2	38044344	T	C	456348	0.311574	-4.8572	7.2697	0.504043	-0.0919078	0.137557	0.504043	1	0.0143570598756832	94.0837890780009
328	rs4679256	G	T	0.750919	0.0162522	0.00214937	exposure	TRUE	3.98819999960104e-14	inferred	R29r7e	textfile	3	126252506	T	G	455475	0.249375	-2.97698	6.79202	0.661165	-0.0645323	0.147232	0.661165	1	0.0112032080261066	57.1744440706221
329	rs4679703	C	A	0.516217	-0.012484	0.00186111	exposure	TRUE	1.97546768729686e-11	inferred	R29r7e	textfile	3	152997867	A	C	456348	0.483742	-4.84909	7.8176	0.535074	-0.079344	0.127917	0.535074	1	-0.00992918	44.9949148916622
330	rs4711890	C	G	0.732421	-0.0302947	0.00210463	exposure	TRUE	5.61814986678255e-47	inferred	R29r7e	textfile	6	47606712	G	C	450366	0.265689	2.14856	6.88321	0.75493	0.0453488	0.145281	0.75493	1	-0.0214442	207.196206127278
331	rs4719841	A	G	0.593655	0.0130963	0.00190308	exposure	TRUE	5.91698854156557e-12	inferred	R29r7e	textfile	7	25997536	G	A	456348	0.405742	2.90135	7.75052	0.70815	0.0482989	0.129024	0.70815	1	0.0101864278318612	47.3568862733216
332	rs4720246	A	G	0.83604	0.018276	0.00252888	exposure	TRUE	4.94090285329101e-13	inferred	R29r7e	textfile	7	37436388	G	A	453584	0.162476	-5.68956	5.75804	0.3231	-0.171605	0.17367	0.3231	1	0.0107300073520478	52.2282958150993
333	rs4739824	C	T	0.155496	-0.0153217	0.00261202	exposure	TRUE	4.4685568388435e-09	inferred	R29r7e	textfile	8	82674399	C	T	447955	0.152323	0.101177	5.56823	0.985503	0.00326321	0.17959	0.985503	1	-0.0087639	34.4081175461991
334	rs4743154	T	C	0.436375	-0.0173449	0.00188652	exposure	TRUE	3.78060156086361e-20	inferred	R29r7e	textfile	9	100795045	T	C	448443	0.436177	-7.98653	7.69259	0.299171	-0.134963	0.129995	0.299171	1	-0.0137283	84.531927741335
335	rs4783189	A	G	0.134649	0.0387182	0.00279111	exposure	TRUE	9.36656834664024e-44	inferred	R29r7e	textfile	16	85417012	A	G	445009	0.12993	-6.85015	5.21415	0.188926	-0.251961	0.191786	0.188926	1	0.02079030715009	192.431609465745
336	rs4783997	T	G	0.69905	0.0116213	0.0020499	exposure	TRUE	1.43462991577957e-08	inferred	R29r7e	textfile	16	57580478	G	T	455783	0.300498	0.323048	7.17147	0.96407	0.00628131	0.139441	0.96407	1	0.00839708630304588	32.1398669158922
337	rs4807462	A	T	0.640907	0.0135047	0.00196644	exposure	TRUE	6.52964152555764e-12	inferred	R29r7e	textfile	19	3408665	T	A	447460	0.357403	1.07358	7.42921	0.885099	0.0194514	0.134604	0.885099	1	0.0102660935092732	47.1637667068523
338	rs4810645	T	C	0.773548	-0.0121752	0.00224777	exposure	TRUE	6.07537482595723e-08	inferred	R29r7e	textfile	20	46134921	C	T	456348	0.227022	1.31319	6.56199	0.841386	0.0304971	0.152393	0.841386	1	-0.00801795	29.3392134609592
339	rs4812447	A	G	0.559342	-0.0174814	0.0019029	exposure	TRUE	4.05021035929548e-20	inferred	R29r7e	textfile	20	39272620	G	A	448319	0.440344	7.41312	7.72294	0.337114	0.12429	0.129484	0.337114	1	-0.0137191	84.3957327470955
340	rs4820499	T	C	0.535992	0.0313835	0.00189117	exposure	TRUE	7.60553957830358e-62	inferred	R29r7e	textfile	22	43375141	C	T	454547	0.464424	7.32896	7.80943	0.348	0.120172	0.12805	0.348	1	0.0246065566795234	275.385844136513
341	rs4846082	C	T	0.533618	0.0374588	0.00185672	exposure	TRUE	1.63296570255483e-90	inferred	R29r7e	textfile	1	12042443	T	C	456078	0.467094	0.162851	7.8089	0.983362	0.00267061	0.128059	0.983362	1	0.0298603663480166	407.019194115975
342	rs4846914	G	A	0.393938	-0.0250529	0.0018963	exposure	TRUE	7.53441937847877e-40	inferred	R29r7e	textfile	1	230295691	G	A	456348	0.393357	7.2771	7.6565	0.341885	0.124136	0.130608	0.341885	1	-0.0195533	174.542792404537
343	rs4849845	G	A	0.310371	0.0318022	0.00201753	exposure	TRUE	5.59695462990409e-56	inferred	R29r7e	textfile	2	121013169	G	A	453830	0.310468	-2.64059	7.23213	0.715023	-0.0504856	0.138272	0.715023	1	0.0233922859583178	248.470209654986
344	rs4874156	G	A	0.904777	0.018061	0.00319794	exposure	TRUE	1.62610308920862e-08	inferred	R29r7e	textfile	8	144661564	A	G	455342	0.0945037	-8.73577	4.55888	0.0553384	-0.420325	0.219352	0.0553384	1	0.00836928523172858	31.8964950228922
345	rs4888387	T	G	0.405106	-0.0170286	0.001915	exposure	TRUE	5.99003158548394e-19	inferred	R29r7e	textfile	16	75389755	T	G	455346	0.404827	1.04126	7.68326	0.892199	0.0176387	0.130153	0.892199	1	-0.0131766	79.0715644554125
346	rs4902387	C	T	0.204628	-0.0262376	0.00234819	exposure	TRUE	5.49451296305297e-29	inferred	R29r7e	textfile	14	65792839	C	T	447236	0.200817	9.51875	6.1996	0.12469	0.247658	0.161301	0.12469	1	-0.0167056	124.848044737329
347	rs4937290	G	A	0.387286	-0.0138551	0.00191804	exposure	TRUE	5.06394753118232e-13	inferred	R29r7e	textfile	11	127958466	G	A	454636	0.387267	-9.45641	7.63228	0.215345	-0.162337	0.131022	0.215345	1	-0.0107126	52.1799921463304
348	rs4947068	C	T	0.343974	-0.0163301	0.00196507	exposure	TRUE	9.55510357850555e-17	inferred	R29r7e	textfile	6	110693851	C	T	447677	0.342124	-8.39775	7.3748	0.254825	-0.154405	0.135597	0.254825	1	-0.0124193	69.0592150111843
349	rs4947490	A	G	0.319357	-0.0159229	0.00200635	exposure	TRUE	2.08381744876692e-15	inferred	R29r7e	textfile	7	55160538	A	G	456348	0.319868	-6.87385	7.3169	0.3475	-0.128394	0.13667	0.3475	1	-0.0117473	62.9841021348293
350	rs4961382	G	C	0.711017	0.0192515	0.00208175	exposure	TRUE	2.2927150929972e-20	inferred	R29r7e	textfile	8	142398860	C	G	449655	0.286818	5.27546	7.0116	0.451816	0.107307	0.142621	0.451816	1	0.0137897361553964	85.5208484111429
351	rs4965426	G	A	0.856639	0.0392669	0.00268634	exposure	TRUE	2.18034621612823e-48	inferred	R29r7e	textfile	15	99248041	A	G	455612	0.143056	-7.39565	5.49339	0.178212	-0.245073	0.182037	0.178212	1	0.0216504637704337	213.663960942382
352	rs4986172	C	T	0.658267	-0.0114511	0.00197624	exposure	TRUE	6.85710429122064e-09	inferred	R29r7e	textfile	17	43216281	T	C	456348	0.341453	2.16783	7.42338	0.770265	0.0393389	0.13471	0.770265	1	-0.00857718	33.5749244301458
353	rs5022654	T	A	0.156619	-0.0518223	0.00256614	exposure	TRUE	1.09096333969251e-90	inferred	R29r7e	textfile	9	4766378	T	A	455440	0.155703	-6.38168	5.68103	0.261296	-0.197734	0.176025	0.261296	1	-0.0299108	407.823901985183
354	rs504082	G	T	0.284811	-0.0157762	0.00206445	exposure	TRUE	2.14136434599226e-14	inferred	R29r7e	textfile	9	35079361	G	T	455843	0.283926	-0.197131	7.08137	0.977791	-0.00393116	0.141216	0.977791	1	-0.0113178	58.3977438455588
355	rs5130	C	T	0.133643	-0.0353205	0.00275212	exposure	TRUE	1.05863001497126e-37	inferred	R29r7e	textfile	11	116703146	C	T	453419	0.131605	1.20815	5.27242	0.818756	0.0434612	0.189666	0.818756	1	-0.019056	164.709615320921
356	rs55633676	T	C	0.842444	-0.0190444	0.00255199	exposure	TRUE	8.48519226526562e-14	inferred	R29r7e	textfile	12	6194991	C	T	454272	0.156242	-2.79678	5.70812	0.624159	-0.0858363	0.175189	0.624159	1	-0.0110715	55.6899275275419
357	rs55642258	G	A	0.763741	0.0384527	0.00218417	exposure	TRUE	2.24802759162172e-69	inferred	R29r7e	textfile	1	45916061	A	G	455092	0.235859	-1.7208	6.61801	0.79485	-0.0392894	0.151103	0.79485	1	0.0260881880546883	309.942266098506
358	rs556562	A	C	0.192916	-0.0214357	0.0023674	exposure	TRUE	1.3715416358993e-19	inferred	R29r7e	textfile	11	85666440	A	C	454759	0.191728	-3.80925	6.14484	0.535316	-0.100883	0.162738	0.535316	1	-0.0134257	81.9845569538882
359	rs55708816	G	A	0.897646	-0.0322207	0.00310395	exposure	TRUE	3.04027007136e-25	inferred	R29r7e	textfile	20	54990124	A	G	455882	0.102095	0.810782	4.75278	0.864545	0.035893	0.210403	0.864545	1	-0.0153725	107.755763639871
360	rs55773542	C	T	0.894571	0.0283787	0.00308283	exposure	TRUE	3.40383829439622e-20	inferred	R29r7e	textfile	21	36368272	T	C	454016	0.103932	1.7733	4.76272	0.709648	0.0781758	0.209964	0.709648	1	0.0136605370085107	84.7394890006805
361	rs55776147	A	G	0.364969	0.0188721	0.00194111	exposure	TRUE	2.42190056500776e-22	inferred	R29r7e	textfile	5	156400808	A	G	455114	0.364598	-4.67878	7.53204	0.534479	-0.0824722	0.132766	0.534479	1	0.0144100618053697	94.523580558706
362	rs55879786	G	A	0.814443	0.0331979	0.0024133	exposure	TRUE	4.67291938480333e-43	inferred	R29r7e	textfile	4	57813895	A	G	455937	0.185234	-1.4419	6.08443	0.812671	-0.038949	0.164354	0.812671	1	0.0203684380324701	189.233751416885
363	rs55895668	T	C	0.570457	-0.0426662	0.00189696	exposure	TRUE	4.98406236699962e-112	inferred	R29r7e	textfile	8	145001031	C	T	456348	0.429036	-3.77484	7.75329	0.626351	-0.0627951	0.128977	0.626351	1	-0.0332765	505.884744549746
364	rs55916318	G	A	0.823938	-0.016825	0.00246689	exposure	TRUE	9.0832609469633e-12	inferred	R29r7e	textfile	7	115668086	A	G	450670	0.17366	-3.49947	5.88837	0.55231	-0.100928	0.169826	0.55231	1	-0.0101591	46.5168798892913
365	rs55929441	A	G	0.893503	0.0187818	0.00300244	exposure	TRUE	3.96213407734375e-10	inferred	R29r7e	textfile	1	11831875	G	A	455759	0.106537	2.7752	4.83378	0.565883	0.118773	0.206877	0.565883	1	0.00926568553793712	39.131432676968
366	rs56043070	G	A	0.928299	0.133717	0.00358628	exposure	TRUE	2.79721043539444e-304	inferred	R29r7e	textfile	1	247719769	A	G	456348	0.0716493	-5.77945	4.06387	0.154981	-0.349951	0.246071	0.154981	1	0.0551105555162104	1390.22425215556
367	rs56088754	A	G	0.694145	-0.0176072	0.00206433	exposure	TRUE	1.47291321614268e-17	inferred	R29r7e	textfile	16	53158219	G	A	434513	0.301456	-2.75444	7.03118	0.695245	-0.0557156	0.142224	0.695245	1	-0.0129382	72.7482
368	rs56130943	A	C	0.766744	-0.0143769	0.00228187	exposure	TRUE	2.96705413391616e-10	inferred	R29r7e	textfile	14	105906522	C	A	427730	0.223712	5.77548	6.31231	0.360216	0.144948	0.158421	0.360216	1	-0.0096332	39.6961791200828
369	rs56228924	G	A	0.554966	0.0169457	0.0018726	exposure	TRUE	1.43901253447751e-19	inferred	R29r7e	textfile	2	85658862	A	G	456348	0.44609	-1.90029	7.7948	0.807394	-0.0312759	0.128291	0.807394	1	0.0133945586324929	81.8896451162141
370	rs56268840	C	T	0.725482	0.0304725	0.00208463	exposure	TRUE	2.1658835685276e-48	inferred	R29r7e	textfile	3	12271381	T	C	453893	0.27382	-0.36566	6.98356	0.958242	-0.00749763	0.143193	0.958242	1	0.0216920758697891	213.677210074246
371	rs567895	C	T	0.748823	-0.0144447	0.00214353	exposure	TRUE	1.59761557002584e-11	inferred	R29r7e	textfile	12	57823192	T	C	454598	0.250974	5.97597	6.84838	0.382875	0.127419	0.14602	0.382875	1	-0.00999412	45.4106711608005
372	rs5746638	C	T	0.71505	0.0148732	0.00211465	exposure	TRUE	2.0154631009492e-12	inferred	R29r7e	textfile	22	18907997	T	C	439960	0.280166	8.73865	6.91252	0.206167	0.182882	0.144665	0.206167	1	0.0106031742125994	49.4688531914257
373	rs57486725	T	G	0.923541	0.0445609	0.00353136	exposure	TRUE	1.66711126816011e-36	inferred	R29r7e	textfile	5	111061016	G	T	454194	0.0752564	1.85166	4.11587	0.652796	0.109304	0.242962	0.652796	1	0.0187204423441418	159.229642719332
374	rs57556994	T	C	0.924667	-0.0278165	0.00354908	exposure	TRUE	4.59001701524832e-15	inferred	R29r7e	textfile	7	135667470	C	T	455777	0.075006	7.38512	4.13907	0.0743839	0.431073	0.2416	0.0743839	1	-0.0116087	61.4289922185021
375	rs57843631	C	T	0.980311	0.244745	0.00699679	exposure	TRUE	4.5942336705023e-268	inferred	R29r7e	textfile	19	16206012	T	C	451969	0.0168905	2.85097	2.02078	0.158296	0.698159	0.494858	0.158296	1	0.0519606475897875	1223.57326121506
376	rs57935882	G	C	0.905193	-0.0213759	0.00321943	exposure	TRUE	3.14421189951219e-11	inferred	R29r7e	textfile	7	152380502	C	G	450576	0.0923107	2.425	4.51406	0.591123	0.119008	0.22153	0.591123	1	-0.00989102	44.0849999715172
377	rs58050591	C	G	0.833055	0.0153212	0.00253683	exposure	TRUE	1.54586767433741e-09	inferred	R29r7e	textfile	18	42120988	G	C	453593	0.165936	-4.95513	5.80964	0.393706	-0.14681	0.172128	0.393706	1	0.00896709438868538	36.4756326955625
378	rs583306	C	T	0.261936	-0.0227087	0.00214405	exposure	TRUE	3.26329399389135e-26	inferred	R29r7e	textfile	18	9617742	C	T	454597	0.261447	7.87405	6.86555	0.251426	0.167051	0.145655	0.251426	1	-0.0157069	112.179817169563
379	rs585721	T	C	0.61598	-0.0157688	0.00192425	exposure	TRUE	2.51057785195235e-16	inferred	R29r7e	textfile	11	77553638	C	T	453161	0.383439	6.07235	7.59624	0.424065	0.105235	0.131644	0.424065	1	-0.0121725	67.154373126819
380	rs58610458	T	A	0.950277	0.0443309	0.00427474	exposure	TRUE	3.37993688326478e-25	inferred	R29r7e	textfile	12	49605488	A	T	455738	0.0495372	1.60734	3.422	0.638563	0.137261	0.292227	0.638563	1	0.0153599194531244	107.545857500421
381	rs58722186	C	T	0.688451	-0.0206064	0.00203169	exposure	TRUE	3.57851407909259e-24	inferred	R29r7e	textfile	16	79751591	T	C	454596	0.311832	13.0073	7.26334	0.0733229	0.246555	0.137678	0.0733229	1	-0.0150412	102.870148248532
382	rs589450	T	A	0.182231	0.016882	0.00242086	exposure	TRUE	3.09030864839394e-12	inferred	R29r7e	textfile	11	32912012	T	A	452565	0.180659	10.1217	5.99431	0.0913046	0.281693	0.166825	0.0913046	1	0.0103655265064991	48.6304672795407
383	rs59774409	C	T	0.917765	-0.0197041	0.00341415	exposure	TRUE	7.86600821516254e-09	inferred	R29r7e	textfile	19	50016748	T	C	456136	0.0817256	5.32058	4.26671	0.212398	0.292262	0.234373	0.212398	1	-0.008545	33.3079581380028
384	rs5992431	G	A	0.625279	0.010464	0.00194724	exposure	TRUE	7.71115734410606e-08	inferred	R29r7e	textfile	22	19575577	A	G	453829	0.374361	-11.0263	7.57084	0.145277	-0.192372	0.132086	0.145277	1	0.00797662668150584	28.8772942062221
385	rs6009077	A	T	0.642976	0.0125374	0.00196978	exposure	TRUE	1.95451090399565e-10	inferred	R29r7e	textfile	22	47363831	T	A	453140	0.357324	-11.5575	7.50199	0.123415	-0.205358	0.133298	0.123415	1	0.00945486003455679	40.5116112922018
386	rs6044953	G	A	0.410773	0.00998125	0.00191245	exposure	TRUE	1.79803704458014e-07	inferred	R29r7e	textfile	20	17669186	G	A	456348	0.409729	4.59672	7.69796	0.550417	0.0775705	0.129905	0.550417	1	0.00772564519232052	27.2389076845309
387	rs6060976	G	A	0.710049	0.0285993	0.00207609	exposure	TRUE	3.57604972399721e-43	inferred	R29r7e	textfile	20	30414942	A	G	453076	0.288395	-11.417	7.07754	0.106717	-0.227922	0.141292	0.106717	1	0.0204613236721002	189.766021989495
388	rs6070696	A	G	0.814964	-0.0515961	0.0024298	exposure	TRUE	4.56494518495751e-100	inferred	R29r7e	textfile	20	57597645	G	A	454277	0.184543	1.95414	6.06201	0.747181	0.0531768	0.164962	0.747181	1	-0.0314899	450.912937483906
389	rs60757417	C	G	0.940014	0.0868006	0.0039657	exposure	TRUE	3.39223833631906e-106	inferred	R29r7e	textfile	9	135864436	G	C	452742	0.0583323	-0.438868	3.65862	0.904519	-0.0327868	0.273327	0.904519	1	0.0325123812283945	479.077461624178
390	rs6081559	A	G	0.628097	0.0147514	0.00194823	exposure	TRUE	3.68390443277829e-14	inferred	R29r7e	textfile	20	19270218	G	A	454100	0.371244	5.88704	7.5636	0.436369	0.102906	0.132212	0.436369	1	0.0112354586297605	57.3305391349909
391	rs61009920	C	A	0.861631	-0.0514866	0.00272629	exposure	TRUE	1.5089370434342e-79	inferred	R29r7e	textfile	15	65181280	A	C	456313	0.137926	-1.0074	5.39886	0.851978	-0.034562	0.185224	0.851978	1	-0.0279462	356.651722396641
392	rs61025394	G	A	0.789124	0.0154185	0.0022827	exposure	TRUE	1.43327434013474e-11	inferred	R29r7e	textfile	6	7085817	A	G	454053	0.209752	-1.77712	6.38862	0.780882	-0.0435416	0.156528	0.780882	1	0.0100234943536526	45.6232871162783
393	rs6140670	G	A	0.290853	0.0130247	0.00211701	exposure	TRUE	7.63173483471616e-10	inferred	R29r7e	textfile	20	8637727	G	A	421696	0.282649	-10.8479	6.77484	0.109331	-0.236346	0.147605	0.109331	1	0.00947385247873778	37.8520703756006
394	rs6141	C	T	0.467574	-0.0576751	0.00186134	exposure	TRUE	8.37577899749155e-211	inferred	R29r7e	textfile	3	184090266	C	T	456348	0.468737	2.83526	7.83503	0.717449	0.0461861	0.127632	0.717449	1	-0.0458204	960.119502925551
395	rs614570	C	T	0.571336	-0.0165333	0.0018768	exposure	TRUE	1.25926303433993e-18	inferred	R29r7e	textfile	6	52319251	T	C	455110	0.42821	-0.734543	7.75885	0.924576	-0.0122017	0.128885	0.924576	1	-0.0130571	77.6038205624391
396	rs61776528	T	C	0.902287	-0.0174464	0.00311868	exposure	TRUE	2.21690358734776e-08	inferred	R29r7e	textfile	1	26697398	C	T	456062	0.0974725	0.833617	4.66977	0.85832	0.0382275	0.214143	0.85832	1	-0.00828341	31.2946443703733
397	rs61872786	G	A	0.791901	-0.0122932	0.00231021	exposure	TRUE	1.0305787981102e-07	inferred	R29r7e	textfile	10	114806697	A	G	454899	0.207313	-9.66416	6.33862	0.127347	-0.240533	0.157763	0.127347	1	-0.00788939	28.3156787016365
398	rs61897429	G	A	0.856526	-0.0262306	0.00266941	exposure	TRUE	8.66905525966174e-23	inferred	R29r7e	textfile	11	47424864	A	G	456213	0.143552	-5.31477	5.50403	0.334237	-0.175438	0.181685	0.334237	1	-0.0145467	96.5574712392137
399	rs61963357	G	A	0.805503	0.0157921	0.00238682	exposure	TRUE	3.68109875429655e-11	inferred	R29r7e	textfile	13	110925564	A	G	450634	0.193011	11.3679	6.175	0.0656286	0.29813	0.161943	0.0656286	1	0.00985571438493398	43.7764393329198
400	rs61966631	T	C	0.644888	-0.0308595	0.00196668	exposure	TRUE	1.73836216816728e-55	inferred	R29r7e	textfile	13	114015702	C	T	454450	0.355511	-6.21957	7.52017	0.408208	-0.109978	0.132976	0.408208	1	-0.02327	246.212652958456
401	rs61986599	G	A	0.671042	0.0186518	0.0020083	exposure	TRUE	1.58166297259007e-20	inferred	R29r7e	textfile	14	81860917	A	G	450735	0.328065	6.30084	7.3102	0.388729	0.117907	0.136795	0.388729	1	0.0138321895980962	86.2550087108127
402	rs62002318	A	G	0.571449	-0.0129747	0.00191671	exposure	TRUE	1.29446632952595e-11	inferred	R29r7e	textfile	15	39629050	G	A	441705	0.427628	0.78893	7.62129	0.917553	0.0135826	0.131211	0.917553	1	-0.0101848	45.8228220768723
403	rs62007172	G	A	0.825134	0.015552	0.00249044	exposure	TRUE	4.24669565553731e-10	inferred	R29r7e	textfile	15	77306741	A	G	450974	0.172611	5.12078	5.87972	0.383797	0.148123	0.170076	0.383797	1	0.00929857930139964	38.9960239935799
404	rs62022873	C	G	0.862659	0.018949	0.00273858	exposure	TRUE	4.53946982320399e-12	inferred	R29r7e	textfile	15	86180227	G	C	455835	0.137647	1.37342	5.3794	0.798483	0.0474608	0.185894	0.798483	1	0.0102479070198724	47.8764265094704
405	rs62085764	A	G	0.912711	-0.0212355	0.00334759	exposure	TRUE	2.24575595505079e-10	inferred	R29r7e	textfile	18	22471557	G	A	455761	0.0869425	-6.72376	4.44726	0.130563	-0.339959	0.224857	0.130563	1	-0.00939601	40.2402303881305
406	rs62121823	G	A	0.933636	-0.0502336	0.00376415	exposure	TRUE	1.26211585684131e-40	inferred	R29r7e	textfile	19	39178481	A	G	456190	0.0662619	1.52794	3.91988	0.69669	0.0994399	0.25511	0.69669	1	-0.0197547	178.096245054448
407	rs62188009	G	A	0.722657	0.0141037	0.00208092	exposure	TRUE	1.22165579901013e-11	inferred	R29r7e	textfile	2	225816054	A	G	455684	0.277416	9.98213	6.99728	0.153703	0.203876	0.142913	0.153703	1	0.0100397951431797	45.936230507622
408	rs62240976	C	G	0.908128	0.0259596	0.00323214	exposure	TRUE	9.61260728979663e-16	inferred	R29r7e	textfile	3	18487337	G	C	452915	0.0900103	4.30941	4.45243	0.333105	0.217382	0.224596	0.333105	1	0.0119335460437508	64.5083100629842
409	rs62341030	A	G	0.950548	0.0264682	0.0043763	exposure	TRUE	1.4658476981131e-09	inferred	R29r7e	textfile	4	174445282	G	A	452611	0.0476016	2.26503	3.3274	0.496048	0.20458	0.300535	0.496048	1	0.00898955471978544	36.5792371251613
410	rs62397628	C	T	0.794372	-0.0221075	0.00234681	exposure	TRUE	4.50082662000917e-21	inferred	R29r7e	textfile	6	33820076	T	C	442244	0.201357	3.5132	6.19273	0.570504	0.091609	0.16148	0.570504	1	-0.0141641	88.7408138046134
411	rs630505	T	C	0.733714	-0.0178089	0.00209449	exposure	TRUE	1.8517028824026e-17	inferred	R29r7e	textfile	1	111737916	C	T	456348	0.266173	-15.8384	6.94622	0.0225987	-0.328258	0.143941	0.0225781	1	-0.0125857	72.2965558218059
412	rs632157	G	A	0.933743	0.0323309	0.00380477	exposure	TRUE	1.93775861548256e-17	inferred	R29r7e	textfile	18	72911548	A	G	455538	0.0652964	-3.93249	3.84654	0.306617	-0.265783	0.259974	0.306617	1	0.012589069074261	72.206911836942
413	rs637002	G	C	0.340801	0.0102898	0.00197614	exposure	TRUE	1.91897680246598e-07	inferred	R29r7e	textfile	11	128614236	G	C	450244	0.339451	0.278737	7.38705	0.9699	0.00510801	0.135372	0.9699	1	0.00775984678089785	27.1130546306995
414	rs6425521	C	A	0.197455	0.0699931	0.00233477	exposure	TRUE	1.86658643442752e-197	inferred	R29r7e	textfile	1	171942783	C	A	452265	0.196574	-5.62628	6.20592	0.364619	-0.146086	0.161137	0.364619	1	0.0445332630937574	898.715535478563
415	rs6445826	T	C	0.502652	-0.106773	0.00189772	exposure	TRUE	0	inferred	R29r7e	textfile	3	56848999	C	T	415287	0.497782	-8.55726	7.47411	0.252242	-0.153185	0.133795	0.252242	1	-0.0869776	3165.61883502318
416	rs6466131	C	T	0.547751	0.0135805	0.00187887	exposure	TRUE	4.90105648157481e-13	inferred	R29r7e	textfile	7	106408569	T	C	455394	0.452358	-12.0943	7.79244	0.120648	-0.199175	0.12833	0.120648	1	0.0107102946499517	52.2441966619972
417	rs646809	C	T	0.208891	-0.0207834	0.00230117	exposure	TRUE	1.69077019791597e-19	inferred	R29r7e	textfile	11	94834871	C	T	452773	0.207501	1.53531	6.30607	0.807645	0.0386082	0.158577	0.807645	1	-0.0134211	81.5709997687529
418	rs6484576	A	G	0.699828	0.0102221	0.00204023	exposure	TRUE	5.43541612459139e-07	inferred	R29r7e	textfile	11	32406141	G	A	451920	0.298016	-3.22504	7.14228	0.651599	-0.0632209	0.140011	0.651599	1	0.00745279395385222	25.1027899423252
419	rs6490291	T	A	0.0354503	0.0534862	0.00535169	exposure	TRUE	1.61483153682118e-23	inferred	R29r7e	textfile	12	112177775	T	A	443188	0.0273259	0.353067	2.4936	0.887404	0.0567811	0.401026	0.887404	1	0.0150109729959342	99.8853027942059
420	rs6533483	G	A	0.596883	0.026395	0.00192055	exposure	TRUE	5.57474921242828e-43	inferred	R29r7e	textfile	4	110887989	A	G	450590	0.401838	-7.49166	7.63321	0.326367	-0.128577	0.131007	0.326367	1	0.0204698768664413	188.882662673456
421	rs6535524	T	A	0.441596	0.0142479	0.00190402	exposure	TRUE	7.26105196753016e-14	inferred	R29r7e	textfile	4	76462316	T	A	443451	0.441093	2.57841	7.66461	0.736566	0.0438906	0.13047	0.736566	1	0.0112364751086642	55.9962191812981
422	rs6542680	C	T	0.180261	0.0130988	0.00244268	exposure	TRUE	8.20912742508334e-08	inferred	R29r7e	textfile	2	3640142	C	T	448122	0.177082	10.061	5.9149	0.0889508	0.287572	0.169065	0.0889508	1	0.00801039324530316	28.7560923180044
423	rs6545465	T	C	0.193077	0.0177216	0.00235897	exposure	TRUE	5.80392139632891e-14	inferred	R29r7e	textfile	2	55212337	T	C	455520	0.192663	-0.680568	6.19204	0.912481	-0.0177502	0.161498	0.912481	1	0.0111301454176757	56.4366236311101
424	rs655029	G	A	0.290696	-0.0745124	0.00207429	exposure	TRUE	1.39137461910674e-282	inferred	R29r7e	textfile	2	31477838	G	A	437924	0.285881	1.31984	6.94542	0.849285	0.0273607	0.14398	0.849285	1	-0.0542028	1290.38158516344
425	rs6556405	T	C	0.748884	0.031953	0.00215859	exposure	TRUE	1.40680049042781e-49	inferred	R29r7e	textfile	5	158635102	C	T	453973	0.249521	5.23993	6.76506	0.438601	0.114494	0.147818	0.438601	1	0.0219645665349719	219.120473249581
426	rs6557870	G	A	0.244424	0.0149152	0.002193	exposure	TRUE	1.03695969630379e-11	inferred	R29r7e	textfile	8	25782001	G	A	451876	0.243104	9.74191	6.69863	0.145859	0.217106	0.149284	0.145859	1	0.0101171815893576	46.2573659712774
427	rs6578303	A	C	0.325166	0.0111978	0.00199206	exposure	TRUE	1.89617762563741e-08	inferred	R29r7e	textfile	11	2994057	A	C	455817	0.325521	-12.4189	7.35842	0.091467	-0.229358	0.135899	0.091467	1	0.00832570334468302	31.5980718867294
428	rs6582566	A	G	0.908877	0.0212086	0.00322457	exposure	TRUE	4.79431557088708e-11	inferred	R29r7e	textfile	12	46041378	G	A	456348	0.0909153	-3.55468	4.51011	0.430604	-0.174754	0.221724	0.430604	1	0.00973581884769913	43.2593893037748
429	rs6585247	T	G	0.629422	-0.00963654	0.00195546	exposure	TRUE	8.30684177671345e-07	inferred	R29r7e	textfile	10	115547280	G	T	446164	0.367818	-3.00203	7.46117	0.687424	-0.0539263	0.134027	0.687424	1	-0.00737758	24.2853509332438
430	rs6592965	G	A	0.545099	-0.0157199	0.00188408	exposure	TRUE	7.20980169687362e-17	inferred	R29r7e	textfile	7	50427982	A	G	451338	0.454295	-4.65243	7.76499	0.54907	-0.0771611	0.128783	0.54907	1	-0.0124184	69.6146876910175
431	rs6593513	T	C	0.590512	0.0117611	0.00191308	exposure	TRUE	7.85995000317322e-10	inferred	R29r7e	textfile	10	43871962	C	T	450258	0.408259	-5.94551	7.65696	0.437463	-0.101409	0.1306	0.437463	1	0.00916150515105328	37.7945885978476
432	rs66476655	T	C	0.919132	0.0194197	0.00340769	exposure	TRUE	1.20662757563888e-08	inferred	R29r7e	textfile	6	43759942	C	T	455884	0.0804196	-4.86948	4.27124	0.254261	-0.266916	0.234124	0.254261	1	0.00843996694403339	32.4761750372506
433	rs6668637	A	G	0.808585	0.012598	0.00235157	exposure	TRUE	8.44879046828345e-08	inferred	R29r7e	textfile	1	204452295	G	A	455903	0.191452	1.73883	6.1763	0.778302	0.0455826	0.161909	0.778302	1	0.00793404667210255	28.7003627487104
434	rs6682423	C	T	0.352258	0.014173	0.00194068	exposure	TRUE	2.811905853924e-13	inferred	R29r7e	textfile	1	63171063	C	T	456348	0.352967	11.0742	7.48591	0.13905	0.197616	0.133584	0.13905	1	0.0108102404816814	53.3354193238808
435	rs6686673	T	C	0.736822	-0.0131478	0.00210686	exposure	TRUE	4.36253593649983e-10	inferred	R29r7e	textfile	1	161654948	C	T	455540	0.263792	-12.8656	6.91392	0.0627699	-0.269141	0.144636	0.0627699	1	-0.00924563	38.9434858189837
436	rs6696074	C	T	0.435395	-0.0140421	0.00189056	exposure	TRUE	1.10684602934771e-13	inferred	R29r7e	textfile	1	225962690	C	T	430985	0.432181	6.96648	7.53937	0.35548	0.122558	0.132637	0.35548	1	-0.0113132	55.1674859536994
437	rs670180	T	A	0.424584	-0.0211607	0.00191045	exposure	TRUE	1.63506541401249e-28	inferred	R29r7e	textfile	13	71236611	T	A	449216	0.424629	3.54755	7.69505	0.644786	0.0599109	0.129954	0.644786	1	-0.0165237	122.684220682298
438	rs6706095	T	G	0.239985	-0.0218568	0.00218493	exposure	TRUE	1.47204203373483e-23	inferred	R29r7e	textfile	2	46075677	T	G	451993	0.238561	2.89837	6.6454	0.66273	0.0656315	0.15048	0.66273	1	-0.0148777	100.068663867736
439	rs67149561	G	C	0.845149	-0.0222834	0.00257788	exposure	TRUE	5.42407185554889e-18	inferred	R29r7e	textfile	1	204929196	C	G	449879	0.152239	4.72642	5.57501	0.396557	0.152069	0.179372	0.396557	1	-0.0128865	74.7201126726871
440	rs6736735	G	A	0.612637	0.0108047	0.00192269	exposure	TRUE	1.91428145458569e-08	inferred	R29r7e	textfile	2	98336433	A	G	444893	0.384744	-4.91481	7.52989	0.513946	-0.0866821	0.132804	0.513946	1	0.00842483147148865	31.5796193415706
441	rs6741486	A	G	0.656911	-0.0123002	0.00196773	exposure	TRUE	4.07939374434209e-10	inferred	R29r7e	textfile	2	106199630	G	A	449944	0.341199	5.55265	7.37707	0.451636	0.102031	0.135555	0.451636	1	-0.00931858	39.0744912592384
442	rs6744560	A	C	0.630199	-0.0163547	0.00192992	exposure	TRUE	2.36519420891594e-17	inferred	R29r7e	textfile	2	37130658	C	A	456348	0.370163	-3.66622	7.54695	0.627117	-0.0643687	0.132504	0.627117	1	-0.0125436	71.8135755758627
443	rs6759839	A	G	0.32203	-0.0141355	0.0020057	exposure	TRUE	1.81946122322481e-12	inferred	R29r7e	textfile	2	16620803	A	G	446541	0.319735	5.49619	7.24919	0.448343	0.104588	0.137946	0.448343	1	-0.0105461	49.6695700720066
444	rs676210	G	A	0.795096	-0.0158383	0.00230365	exposure	TRUE	6.18566835303326e-12	inferred	R29r7e	textfile	2	21231524	A	G	456348	0.20481	0.615608	6.32861	0.922509	0.0153705	0.158013	0.922509	1	-0.0101771	47.2698405509827
445	rs67863435	A	G	0.872162	0.0263911	0.00279141	exposure	TRUE	3.2488725997049e-21	inferred	R29r7e	textfile	2	234264490	G	A	455892	0.127105	0.0959989	5.19063	0.985244	0.00356308	0.192655	0.985244	1	0.0140010709945585	89.3856339476173
446	rs6793096	A	G	0.809911	0.0163072	0.00237688	exposure	TRUE	6.84958068400397e-12	inferred	R29r7e	textfile	3	194140923	G	A	453185	0.188369	6.19179	6.09541	0.309719	0.166652	0.164058	0.309719	1	0.0101909057105976	47.0700091380223
447	rs6804084	T	C	0.248936	0.0286672	0.00215013	exposure	TRUE	1.49240805348309e-40	inferred	R29r7e	textfile	3	178742044	T	C	455679	0.24885	7.52427	6.76993	0.266385	0.164171	0.147712	0.266385	1	0.0197472811375117	177.762895268221
448	rs6854757	A	G	0.826306	-0.020679	0.00248456	exposure	TRUE	8.5762372174494e-17	inferred	R29r7e	textfile	4	17932555	G	A	453513	0.171947	0.904292	5.91325	0.878456	0.0258616	0.169112	0.878456	1	-0.0123581	69.2723767024264
449	rs6857262	T	G	0.536889	-0.0152384	0.00190233	exposure	TRUE	1.14347796243216e-15	inferred	R29r7e	textfile	4	145026050	G	T	432440	0.462147	4.12741	7.61399	0.587762	0.0711956	0.131337	0.587762	1	-0.0121803	64.1663040861974
450	rs6883116	T	C	0.582761	0.010806	0.0019041	exposure	TRUE	1.38589763926335e-08	inferred	R29r7e	textfile	5	179230321	C	T	443998	0.416067	0.351737	7.6232	0.963198	0.00605262	0.131179	0.963198	1	0.00851667216906414	32.2070109058817
451	rs6895953	G	A	0.577701	0.0123248	0.00189606	exposure	TRUE	8.02046409224794e-11	inferred	R29r7e	textfile	5	39084471	A	G	452106	0.421965	-19.4269	7.7015	0.0116531	-0.327531	0.130122	0.0118322	1	0.00966692471265928	42.2528111392348
452	rs6897795	G	A	0.888511	0.0226477	0.0029895	exposure	TRUE	3.5706306354615e-14	inferred	R29r7e	textfile	5	177606419	A	G	452262	0.109208	-1.4303	4.8381	0.767511	-0.0611051	0.206693	0.767511	1	0.0112642920595402	57.3919646218978
453	rs691243	C	T	0.308303	-0.0120632	0.00203158	exposure	TRUE	2.88799067779844e-09	inferred	R29r7e	textfile	8	19020200	C	T	456348	0.308398	10.9758	7.25684	0.130412	0.208421	0.137801	0.130412	1	-0.00878951	35.2579614770419
454	rs6926250	T	C	0.587065	-0.0146266	0.00189023	exposure	TRUE	1.00992738715965e-14	inferred	R29r7e	textfile	6	131302473	C	T	453001	0.413179	6.23803	7.69157	0.417353	0.105443	0.130013	0.417353	1	-0.0114961	59.8766461287145
455	rs6988174	A	C	0.740856	0.0131957	0.00215609	exposure	TRUE	9.34585289979205e-10	inferred	R29r7e	textfile	8	142293797	C	A	449671	0.257575	-11.2029	6.78214	0.0985705	-0.243555	0.147446	0.0985705	1	0.00912643124928402	37.4568365835555
456	rs6989383	C	T	0.454568	-0.0186287	0.00188594	exposure	TRUE	5.20266283911658e-23	inferred	R29r7e	textfile	8	126342923	C	T	456348	0.454598	0.277933	7.79753	0.971566	0.00457116	0.128246	0.971566	1	-0.0146205	97.5684383754513
457	rs6993770	A	T	0.712781	0.0674906	0.00207384	exposure	TRUE	2.56382225113878e-232	inferred	R29r7e	textfile	8	106581528	T	A	456348	0.286605	-4.92301	7.10445	0.488342	-0.0975372	0.140757	0.488342	1	0.0481191051057751	1059.09784532218
458	rs6998007	C	T	0.434794	-0.0141934	0.00190142	exposure	TRUE	8.35329300051238e-14	inferred	R29r7e	textfile	8	40045119	C	T	451618	0.433899	8.20354	7.7307	0.288615	0.137266	0.129354	0.288615	1	-0.011107	55.7207263615735
459	rs7036656	C	T	0.278132	-0.040957	0.00208301	exposure	TRUE	4.52687890219703e-86	inferred	R29r7e	textfile	9	21990457	C	T	453364	0.27715	-7.07207	7.00752	0.312873	-0.144018	0.142704	0.312873	1	-0.0291897	386.610430174825
460	rs706024	G	A	0.398574	-0.0112243	0.00191255	exposure	TRUE	4.39062215415284e-09	inferred	R29r7e	textfile	7	16686940	G	A	456348	0.398309	-3.06908	7.67676	0.689312	-0.0520778	0.130263	0.689312	1	-0.00868726	34.4423627294178
461	rs7080838	C	T	0.43086	-0.0109982	0.00190071	exposure	TRUE	7.19262496832682e-09	inferred	R29r7e	textfile	10	126419841	C	T	449391	0.431387	-1.86094	7.71691	0.809438	-0.0312497	0.129586	0.809438	1	-0.00863134	33.482008837085
462	rs7088799	T	G	0.582582	-0.0775238	0.00190395	exposure	TRUE	0	inferred	R29r7e	textfile	10	65016174	G	T	456081	0.416768	-5.73647	7.7059	0.456619	-0.0966047	0.129771	0.456619	1	-0.0601827	1657.9026537896
463	rs7096937	T	C	0.271536	0.0122548	0.00211941	exposure	TRUE	7.374083737245e-09	inferred	R29r7e	textfile	10	113950418	T	C	453276	0.269829	2.35265	6.90836	0.733442	0.0492954	0.144752	0.733442	1	0.00858805522196369	33.4335503674306
464	rs7111926	C	A	0.359296	0.0262202	0.00197212	exposure	TRUE	2.46026936161257e-40	inferred	R29r7e	textfile	11	128299874	C	A	433029	0.356149	-9.30929	7.30808	0.202722	-0.174305	0.136835	0.202722	1	0.0202002409376772	176.768682552811
465	rs7125695	A	G	0.679173	0.0128628	0.00200306	exposure	TRUE	1.34871543110134e-10	inferred	R29r7e	textfile	11	75908131	G	A	455595	0.321077	-1.53919	7.29351	0.83286	-0.0289346	0.137108	0.83286	1	0.00951334800117595	41.2366253555956
466	rs7159281	A	G	0.331305	0.0152344	0.00200577	exposure	TRUE	3.07109592568734e-14	inferred	R29r7e	textfile	14	23756604	A	G	448945	0.330195	0.559016	7.33457	0.939247	0.0103914	0.136341	0.939247	1	0.0113349789940407	57.6883936551296
467	rs7170637	G	A	0.839822	0.0158107	0.00256344	exposure	TRUE	6.92612087266847e-10	inferred	R29r7e	textfile	15	22969232	A	G	456348	0.160188	-9.33355	5.75287	0.104714	-0.282019	0.173826	0.104714	1	0.00912983053901988	38.0413466938584
468	rs718444	C	T	0.629024	-0.0240782	0.00195044	exposure	TRUE	5.1828232028139e-35	inferred	R29r7e	textfile	13	33147052	T	C	455766	0.371128	-3.59125	7.56768	0.635107	-0.0627075	0.132141	0.635107	1	-0.0182831	152.399255388102
469	rs7206447	A	T	0.922784	-0.0501754	0.00353083	exposure	TRUE	7.86882986130763e-46	inferred	R29r7e	textfile	16	525812	T	A	455057	0.0768244	6.03163	4.17396	0.14844	0.346209	0.239581	0.14844	1	-0.0210613	201.942659233853
470	rs7213347	G	C	0.301444	0.032678	0.00203969	exposure	TRUE	9.10812496417559e-58	inferred	R29r7e	textfile	17	2153257	G	C	455965	0.301508	-9.98012	7.19176	0.165223	-0.192959	0.139048	0.165223	1	0.0237194326387333	256.674428381056
471	rs7233932	C	G	0.680576	-0.01518	0.00202629	exposure	TRUE	6.80784743274461e-14	inferred	R29r7e	textfile	18	812713	G	C	450053	0.318194	-3.99349	7.26315	0.582437	-0.0757012	0.137681	0.582437	1	-0.0111664	56.1229306154137
472	rs7249692	T	C	0.329434	0.0267752	0.00199653	exposure	TRUE	5.22240919882628e-41	inferred	R29r7e	textfile	19	19670688	T	C	455023	0.32901	9.82926	7.35866	0.181634	0.18152	0.135894	0.181634	1	0.0198772065383275	179.851376643844
473	rs7253820	A	G	0.533589	-0.0221686	0.00190518	exposure	TRUE	2.70526243270744e-31	inferred	R29r7e	textfile	19	38726076	G	A	431407	0.466201	-2.81077	7.61807	0.712157	-0.0484323	0.131267	0.712157	1	-0.017713	135.395586219481
474	rs7254827	A	T	0.776409	0.0309245	0.00225065	exposure	TRUE	5.82719555224607e-43	inferred	R29r7e	textfile	19	17202746	T	A	455385	0.224035	4.84488	6.5339	0.458391	0.113485	0.153048	0.458391	1	0.0203571187300284	188.794547443562
475	rs725529	A	T	0.629152	-0.0153912	0.00195849	exposure	TRUE	3.88117444152218e-15	inferred	R29r7e	textfile	10	63814070	T	A	442862	0.36825	5.70815	7.43232	0.442477	0.103335	0.134547	0.442477	1	-0.0118083	61.7592831558503
476	rs72627489	C	T	0.904659	0.0316966	0.00320839	exposure	TRUE	5.11967674455853e-23	inferred	R29r7e	textfile	2	110445505	T	C	448278	0.0920456	-3.75574	4.48336	0.402195	-0.186848	0.223047	0.402195	1	0.0147538549085859	97.6002770308681
477	rs72643495	C	T	0.946371	-0.0215391	0.00414151	exposure	TRUE	1.9844935493695e-07	inferred	R29r7e	textfile	2	85773305	T	C	455464	0.0530975	4.92848	3.50809	0.160054	0.400472	0.285056	0.160054	1	-0.00770602	27.0481568672441
478	rs72670616	G	A	0.876778	0.0154566	0.00286201	exposure	TRUE	6.64146491405596e-08	inferred	R29r7e	textfile	13	114625329	A	G	456348	0.122846	-1.15613	5.14623	0.822248	-0.0436543	0.194317	0.822248	1	0.00799432534727158	29.1665890283983
479	rs72680993	G	A	0.938955	0.0238953	0.00387333	exposure	TRUE	6.86416828861666e-10	inferred	R29r7e	textfile	1	68054742	A	G	455728	0.0603946	-1.81221	3.72871	0.626957	-0.130344	0.268189	0.626957	1	0.00913814301653544	38.0588775339075
480	rs72687006	T	C	0.983217	-0.0616018	0.00754371	exposure	TRUE	3.18830843771435e-16	inferred	R29r7e	textfile	4	123055360	C	T	452125	0.0138922	-0.371884	1.81864	0.837975	-0.112438	0.549861	0.837975	1	-0.0121436	66.6832618658043
481	rs72695256	T	C	0.821201	0.0152884	0.00243674	exposure	TRUE	3.5161648270169e-10	inferred	R29r7e	textfile	1	112133445	C	T	446197	0.175033	8.94187	5.89852	0.129532	0.257006	0.169534	0.129532	1	0.00939228664205316	39.3645860547489
482	rs72699870	T	C	0.804552	0.0145402	0.0023767	exposure	TRUE	9.48698397340379e-10	inferred	R29r7e	textfile	14	93116351	C	T	451435	0.193613	-10.0514	6.16968	0.103279	-0.264059	0.162083	0.103279	1	0.00910502955736668	37.427604205255
483	rs72725158	T	C	0.842562	0.0455154	0.00258255	exposure	TRUE	1.60600181982423e-69	inferred	R29r7e	textfile	14	68476880	C	T	455944	0.156968	-0.0270731	5.66219	0.996185	-0.000844439	0.17661	0.996185	1	0.0260919743560953	310.612729869164
484	rs72761116	C	T	0.935345	0.0227106	0.00382378	exposure	TRUE	2.86230936764793e-09	inferred	R29r7e	textfile	16	1620550	T	C	456213	0.0644249	-2.56838	3.81541	0.500846	-0.176432	0.262095	0.500846	1	0.00879297917958133	35.2753573252048
485	rs72807421	C	T	0.97495	0.0463339	0.00619872	exposure	TRUE	7.73490854476938e-14	inferred	R29r7e	textfile	16	88590467	T	C	451498	0.0227133	1.46174	2.34977	0.53389	0.26474	0.425574	0.53389	1	0.0111235398260122	55.8719302014981
486	rs72853229	A	G	0.915758	0.0219166	0.00335748	exposure	TRUE	6.6790243137892e-11	inferred	R29r7e	textfile	2	145541261	G	A	455153	0.0839553	0.487047	4.35228	0.910898	0.0257121	0.229765	0.910898	1	0.00967523825202406	42.6107809819619
487	rs72882617	A	G	0.864114	0.0177096	0.00272855	exposure	TRUE	8.5563158909187e-11	inferred	R29r7e	textfile	2	173155088	G	A	453429	0.134427	2.0564	5.29838	0.697929	0.073252	0.188737	0.697929	1	0.00963835622555445	42.1263344173361
488	rs72917118	C	T	0.848475	0.0170547	0.00263175	exposure	TRUE	9.15011284335547e-11	inferred	R29r7e	textfile	2	191486081	T	C	441357	0.145568	-4.50002	5.47434	0.411065	-0.150159	0.18267	0.411065	1	0.00975404526371747	41.9951276337742
489	rs7294800	C	A	0.885919	-0.0216009	0.00292828	exposure	TRUE	1.62320597575349e-13	inferred	R29r7e	textfile	12	32911338	A	C	453654	0.112599	-12.9526	4.95254	0.00891352	-0.528083	0.202731	0.00919155	1	-0.0109515	54.4149820400581
490	rs72964896	G	A	0.886276	-0.0203173	0.00294468	exposure	TRUE	5.21260027391856e-12	inferred	R29r7e	textfile	11	72498479	A	G	455151	0.113291	-1.06646	4.97941	0.830412	-0.0430118	0.200827	0.830412	1	-0.0102265	47.6053511872882
491	rs72969820	C	T	0.885455	0.0293177	0.00302298	exposure	TRUE	3.06630286739067e-22	inferred	R29r7e	textfile	18	57345190	T	C	442405	0.108195	2.35385	4.79899	0.623789	0.102206	0.208377	0.623789	1	0.0145793925507129	94.0565934162548
492	rs73040264	T	C	0.920872	-0.0246532	0.00344255	exposure	TRUE	7.99042496066601e-13	inferred	R29r7e	textfile	3	15837538	C	T	456278	0.0791491	-1.55463	4.23433	0.713508	-0.0867077	0.236165	0.713508	1	-0.0106012	51.2844951308136
493	rs73414875	T	C	0.728826	0.0117642	0.0021295	exposure	TRUE	3.30622138713435e-08	inferred	R29r7e	textfile	18	33060286	C	T	452731	0.270781	3.49919	6.92505	0.613352	0.0729663	0.144403	0.613352	1	0.0082101475069374	30.5189445132309
494	rs739320	T	C	0.394224	0.0122374	0.00196503	exposure	TRUE	4.73666463935065e-10	inferred	R29r7e	textfile	19	49261368	T	C	417814	0.389907	-0.0826746	7.33326	0.991005	-0.00153737	0.136365	0.991005	1	0.00963406031014897	38.7828697433464
495	rs75040444	G	T	0.565361	-0.0108729	0.00189786	exposure	TRUE	1.0100555243173e-08	inferred	R29r7e	textfile	20	57268377	T	G	455130	0.434988	2.86319	7.75864	0.712103	0.0475641	0.128889	0.712103	1	-0.00849178	32.8218036028162
496	rs75107487	A	T	0.918401	0.0195745	0.0034409	exposure	TRUE	1.27955210658392e-08	inferred	R29r7e	textfile	15	75233406	T	A	455821	0.0812666	-4.03014	4.28713	0.347189	-0.219274	0.233256	0.347189	1	0.00842571951615636	32.3621415001772
497	rs75107793	G	A	0.927903	-0.109171	0.00367327	exposure	TRUE	4.18748804541224e-194	inferred	R29r7e	textfile	22	50628937	A	G	453095	0.0708494	1.24301	4.03721	0.758167	0.0762627	0.247696	0.758167	1	-0.0441101	883.301307058164
498	rs7516301	T	C	0.474855	-0.0179876	0.00186377	exposure	TRUE	4.85881644012759e-22	inferred	R29r7e	textfile	1	172372260	T	C	446517	0.473806	9.00795	7.74213	0.244628	0.150281	0.129163	0.244628	1	-0.0144417	93.1454851285978
499	rs75511207	T	C	0.902479	0.0250723	0.00315716	exposure	TRUE	1.99896745381265e-15	inferred	R29r7e	textfile	7	139881300	C	T	455104	0.0970921	3.70819	4.66983	0.427153	0.170043	0.21414	0.427153	1	0.0117709935736672	63.0659827487753
500	rs75625811	G	A	0.837404	-0.0122491	0.00252836	exposure	TRUE	1.26814671351984e-06	inferred	R29r7e	textfile	2	128650068	A	G	454478	0.161175	-1.07746	5.75288	0.851433	-0.0325559	0.173826	0.851433	1	-0.00718619	23.4709429854899
501	rs75659987	T	A	0.966747	-0.0349372	0.00525801	exposure	TRUE	3.0410964603385e-11	inferred	R29r7e	textfile	4	154450960	A	T	454854	0.0322664	0.0703231	2.76551	0.979713	0.00919494	0.361598	0.979713	1	-0.00985169	44.1502712956683
502	rs7585866	A	G	0.648295	-0.0199181	0.00194796	exposure	TRUE	1.5305837006546e-24	inferred	R29r7e	textfile	2	192696255	G	A	456348	0.35206	7.33818	7.48579	0.326947	0.130952	0.133586	0.326947	1	-0.0151346	104.552819127407
503	rs760402	G	A	0.310765	0.0160241	0.00201892	exposure	TRUE	2.07186315829034e-15	inferred	R29r7e	textfile	9	35686376	G	A	452224	0.310099	4.06661	7.23455	0.574041	0.0776979	0.138226	0.574041	1	0.0118018053142198	62.9954340284969
504	rs7618405	C	A	0.789321	0.0435207	0.00228799	exposure	TRUE	1.13483342342359e-80	inferred	R29r7e	textfile	3	18250509	A	C	452685	0.208848	-4.48613	6.32679	0.478282	-0.112074	0.158058	0.478282	1	0.0282599356853671	361.812444410346
505	rs7618697	A	G	0.31691	-0.0126845	0.00199852	exposure	TRUE	2.19630122051581e-10	inferred	R29r7e	textfile	3	58200354	A	G	455974	0.316836	0.177127	7.28344	0.980598	0.00333897	0.137298	0.980598	1	-0.00939889	40.2837329278611
506	rs7622074	A	G	0.67766	0.0345057	0.00198982	exposure	TRUE	2.30222113853258e-67	inferred	R29r7e	textfile	3	58312297	G	A	453863	0.321694	-6.26851	7.30385	0.390756	-0.117506	0.136914	0.390756	1	0.0257318961604364	300.714313901501
507	rs763361	T	C	0.472572	0.0189935	0.00188793	exposure	TRUE	8.25866591122555e-24	inferred	R29r7e	textfile	18	67531642	T	C	456348	0.472492	9.92032	7.82132	0.204666	0.162168	0.127856	0.204666	1	0.0148909989637314	101.213449600581
508	rs76445378	C	T	0.984359	-0.108682	0.00750289	exposure	TRUE	1.49953281599234e-47	inferred	R29r7e	textfile	3	124366890	T	C	456214	0.0157536	-1.14852	2.01992	0.569628	-0.281496	0.49507	0.569628	1	-0.021441	209.825412264809
509	rs76452111	A	T	0.956501	0.0555484	0.00461878	exposure	TRUE	2.57428249337084e-33	inferred	R29r7e	textfile	1	171810155	T	A	451475	0.0408871	1.08723	3.0813	0.724203	0.114512	0.324538	0.724203	1	0.0178961177698461	144.640047300602
510	rs7652441	A	G	0.786293	-0.0138238	0.00227144	exposure	TRUE	1.15824945071962e-09	inferred	R29r7e	textfile	3	189719160	G	A	454665	0.213366	-1.52698	6.40398	0.811537	-0.0372336	0.156153	0.811537	1	-0.00902534	37.0384108603525
511	rs76743559	A	G	0.970289	0.0315265	0.00558014	exposure	TRUE	1.60663920850352e-08	inferred	R29r7e	textfile	1	247591691	G	A	451837	0.027552	-2.96261	2.58735	0.252194	-0.442552	0.386496	0.252194	1	0.00840476141254629	31.9198857284371
512	rs7675446	T	A	0.658795	0.0116349	0.00198031	exposure	TRUE	4.22098012046271e-09	inferred	R29r7e	textfile	4	70051247	A	T	452345	0.339519	-6.5538	7.40586	0.376185	-0.119493	0.135028	0.376185	1	0.00873532297878129	34.5190590490332
513	rs7688221	T	G	0.704056	0.0116715	0.00206492	exposure	TRUE	1.58336072138e-08	inferred	R29r7e	textfile	4	99875857	G	T	446490	0.293618	-2.27882	7.06113	0.746902	-0.0457048	0.14162	0.746902	1	0.00845868808909193	31.9482362546042
514	rs7694862	T	C	0.324778	0.0144041	0.00200654	exposure	TRUE	7.04412011852709e-13	inferred	R29r7e	textfile	4	48495615	T	C	454822	0.324855	7.61287	7.33477	0.299309	0.141506	0.136337	0.299309	1	0.0106437319135061	51.531954196025
515	rs7705526	C	A	0.673724	-0.0373847	0.00202006	exposure	TRUE	1.8224119829281e-76	inferred	R29r7e	textfile	5	1285974	A	C	433753	0.32193	-18.8285	7.14291	0.00838969	-0.369033	0.140425	0.00858932	1	-0.0280891	342.498963608525
516	rs7730827	C	G	0.211371	-0.020182	0.0022919	exposure	TRUE	1.29929116326098e-18	inferred	R29r7e	textfile	5	60108924	C	G	455399	0.211242	-1.18683	6.39981	0.852878	-0.0289771	0.156255	0.852878	1	-0.0130478	77.5420135907142
517	rs77338166	A	G	0.934601	0.0246103	0.00379523	exposure	TRUE	8.90061367374828e-11	inferred	R29r7e	textfile	8	105469502	G	A	456348	0.0657404	2.74003	3.89606	0.48188	0.180511	0.256669	0.48188	1	0.00959868358556863	42.0491881244401
518	rs77374501	C	G	0.949976	-0.0280313	0.00434731	exposure	TRUE	1.13362402969827e-10	inferred	R29r7e	textfile	13	28177602	G	C	454340	0.0491581	-0.938414	3.37186	0.780776	-0.0825385	0.296573	0.780776	1	-0.00956562	41.5762445602632
519	rs7753358	T	A	0.514541	0.00992763	0.00189002	exposure	TRUE	1.49919188044479e-07	inferred	R29r7e	textfile	6	79665210	A	T	433424	0.482707	11.1115	7.61089	0.144306	0.191823	0.131391	0.144306	1	0.00797829121557098	27.5904234399518
520	rs77808283	G	A	0.962141	-0.0427143	0.00490986	exposure	TRUE	3.32768097818787e-18	inferred	R29r7e	textfile	19	16189882	A	G	456348	0.0379458	5.44594	3.02971	0.0722547	0.593294	0.330064	0.0722547	1	-0.0128772	75.6847480472619
521	rs77844289	T	C	0.920179	-0.0780135	0.00345566	exposure	TRUE	7.53293716821458e-113	inferred	R29r7e	textfile	7	123411667	C	T	456331	0.0798708	-2.57206	4.2298	0.543133	-0.143761	0.236418	0.543133	1	-0.0334008	509.656436264515
522	rs77882042	T	C	0.955556	0.0285361	0.00456936	exposure	TRUE	4.23535071782167e-10	inferred	R29r7e	textfile	15	63615767	C	T	456348	0.0443532	-1.92812	3.22562	0.550005	-0.185314	0.310018	0.550005	1	0.0092442899981061	39.0012463035718
523	rs7789916	G	A	0.286001	0.0182031	0.00206738	exposure	TRUE	1.30954705648102e-18	inferred	R29r7e	textfile	7	14027557	G	A	456348	0.286071	3.5025	7.09069	0.621336	0.0696628	0.14103	0.621336	1	0.013032899108913	77.526484096455
524	rs7792825	T	C	0.716189	-0.0110558	0.00208317	exposure	TRUE	1.11321960301604e-07	inferred	R29r7e	textfile	7	1006573	C	T	450735	0.282967	2.73786	7.01328	0.696254	0.0556633	0.142587	0.696254	1	-0.00790482	28.1663727367748
525	rs7813776	G	T	0.413271	0.0148037	0.00190837	exposure	TRUE	8.67918790646751e-15	inferred	R29r7e	textfile	8	128837336	G	T	451203	0.412114	2.78582	7.70142	0.717555	0.0469691	0.129846	0.717555	1	0.0115476525931322	60.1749016896918
526	rs78169718	T	C	0.972238	-0.0485616	0.00575869	exposure	TRUE	3.37632029180347e-17	inferred	R29r7e	textfile	17	27932076	C	T	454264	0.0265484	3.31473	2.54855	0.193383	0.510344	0.392381	0.193383	1	-0.0125107	71.1112927778827
527	rs7817522	C	T	0.69073	0.0140726	0.00203336	exposure	TRUE	4.48909796563995e-12	inferred	R29r7e	textfile	8	121040551	T	C	451628	0.308471	4.78415	7.22594	0.50792	0.0916253	0.13839	0.50792	1	0.0102978739256052	47.8983038911275
528	rs78256087	A	G	0.91735	0.0303314	0.00343677	exposure	TRUE	1.08919052425753e-18	inferred	R29r7e	textfile	4	157785885	G	A	451835	0.0798898	-0.63019	4.22945	0.881553	-0.0352294	0.236438	0.881553	1	0.0131285143757892	77.8904074099848
529	rs78261031	G	A	0.938562	0.0277093	0.00391477	exposure	TRUE	1.46099431710174e-12	inferred	R29r7e	textfile	1	156112470	A	G	450670	0.0576464	2.88329	3.62908	0.426907	0.218925	0.275552	0.426907	1	0.0105430630480318	50.100101558671
530	rs783148	A	T	0.143142	0.0143036	0.0026756	exposure	TRUE	8.99484585025094e-08	inferred	R29r7e	textfile	6	161087869	A	T	448735	0.140177	-3.10626	5.38063	0.563734	-0.107293	0.185852	0.563734	1	0.0079802470357197	28.5790862160573
531	rs7835994	G	A	0.498073	-0.0114848	0.00187836	exposure	TRUE	9.70000205262323e-10	inferred	R29r7e	textfile	8	125869751	G	A	455019	0.498106	3.03738	7.82967	0.698066	0.0495465	0.127719	0.698066	1	-0.00906386	37.3842963490843
532	rs7851531	A	G	0.634229	0.0133968	0.00194724	exposure	TRUE	5.98981477750297e-12	inferred	R29r7e	textfile	9	85126285	G	A	442946	0.363419	-11.12	7.42738	0.134352	-0.201573	0.134637	0.134352	1	0.0103367491484483	47.3329075855606
533	rs78794047	C	T	0.949984	0.0409214	0.00428568	exposure	TRUE	1.3171082388691e-21	inferred	R29r7e	textfile	3	56449111	T	C	454888	0.0488802	-2.86827	3.35049	0.391957	-0.255507	0.298464	0.391957	1	0.0141558495918419	91.1720008795568
534	rs78909033	G	A	0.86614	-0.0692926	0.00273489	exposure	TRUE	1.26521316159941e-141	inferred	R29r7e	textfile	2	241510903	A	G	456348	0.134442	0.599356	5.37264	0.911175	0.0207639	0.186128	0.911175	1	-0.0374796	641.939334965243
535	rs79007502	T	C	0.961615	-0.0913917	0.00487155	exposure	TRUE	1.59521083633607e-78	inferred	R29r7e	textfile	17	33880305	C	T	456348	0.0383019	2.47555	3.02623	0.413341	0.270312	0.330444	0.413341	1	-0.0277604	351.948552131269
536	rs7912035	T	C	0.142203	-0.0237423	0.00268277	exposure	TRUE	8.75820184051478e-19	inferred	R29r7e	textfile	10	3707315	T	C	456039	0.142095	3.28765	5.45343	0.546602	0.110547	0.183371	0.546602	1	-0.0131039	78.321084808668
537	rs7934719	C	T	0.588696	-0.0209811	0.00189995	exposure	TRUE	2.37052588328775e-28	inferred	R29r7e	textfile	11	108341864	T	C	453544	0.410094	14.7835	7.69081	0.0545774	0.249938	0.130025	0.0545774	1	-0.0163953	121.947292767523
538	rs79421665	T	G	0.965948	-0.0282559	0.00518265	exposure	TRUE	4.98014724629682e-08	inferred	R29r7e	textfile	1	44498152	G	T	452988	0.0323541	1.07289	2.76074	0.697555	0.140768	0.362222	0.697555	1	-0.00810029	29.7244979838577
539	rs79635379	A	T	0.753073	-0.0234744	0.00215223	exposure	TRUE	1.06705301271926e-27	inferred	R29r7e	textfile	1	91588063	T	A	453030	0.245826	-8.55848	6.73028	0.203502	-0.188943	0.148582	0.203502	1	-0.0162027	118.962926612434
540	rs79716587	G	A	0.874283	0.0231278	0.00282645	exposure	TRUE	2.77710446884429e-16	inferred	R29r7e	textfile	2	143886819	A	G	452296	0.12493	-1.16875	5.18608	0.821698	-0.0434551	0.192824	0.821698	1	0.0121660741629222	66.9554651944589
541	rs7990306	C	T	0.429226	0.0148433	0.00190851	exposure	TRUE	7.4013596186387e-15	inferred	R29r7e	textfile	13	51384010	C	T	448257	0.42857	-3.8351	7.68802	0.617892	-0.0648854	0.130073	0.617892	1	0.0116156670161036	60.4883935303345
542	rs79928864	A	G	0.942548	-0.0258853	0.0043311	exposure	TRUE	2.27827307298285e-09	inferred	R29r7e	textfile	6	27358415	G	A	449056	0.0540979	-2.09248	3.53033	0.553372	-0.167892	0.283259	0.553372	1	-0.00891843	35.7198793155111
543	rs7993628	T	C	0.346661	-0.0174258	0.00197881	exposure	TRUE	1.2945799238173e-18	inferred	R29r7e	textfile	13	47242065	T	C	454056	0.346582	-7.84472	7.43874	0.291619	-0.141768	0.134431	0.291619	1	-0.0130677	77.5491885058946
544	rs80054178	T	C	0.977471	-0.126256	0.00634034	exposure	TRUE	3.13141298628898e-88	inferred	R29r7e	textfile	20	30294682	C	T	456348	0.0225683	1.31458	2.35217	0.576243	0.237602	0.425139	0.576243	1	-0.0294648	396.532654285088
545	rs8011233	C	A	0.168438	-0.0211715	0.00250975	exposure	TRUE	3.2922414007467e-17	inferred	R29r7e	textfile	14	53587757	C	A	455737	0.167799	2.35682	5.88586	0.688846	0.0680311	0.169899	0.688846	1	-0.0124949	71.1610474305106
546	rs8028182	G	T	0.804281	0.0217176	0.00237483	exposure	TRUE	5.96810741573354e-20	inferred	R29r7e	textfile	15	75718669	T	G	456348	0.194557	10.1711	6.21358	0.101647	0.263443	0.160938	0.101647	1	0.0135360636817199	83.6293279601888
547	rs804327	T	C	0.669863	-0.0116504	0.00197738	exposure	TRUE	3.81926572924847e-09	inferred	R29r7e	textfile	12	95862225	C	T	453560	0.329924	6.23974	7.35986	0.396546	0.115193	0.135872	0.396546	1	-0.00874818	34.7137393785859
548	rs8050500	T	C	0.554507	-0.0170151	0.0018918	exposure	TRUE	2.38104965305993e-19	inferred	R29r7e	textfile	16	31404571	C	T	456348	0.445684	-0.971693	7.78486	0.900667	-0.0160335	0.128454	0.900667	1	-0.0133129	80.8944207254726
549	rs8071834	T	C	0.380444	-0.0136986	0.00192707	exposure	TRUE	1.17300798227659e-12	inferred	R29r7e	textfile	17	18099991	T	C	456251	0.380359	4.14474	7.61727	0.586356	0.0714331	0.131281	0.586356	1	-0.0105233	50.530941232267
550	rs8106212	C	T	0.987963	0.0980251	0.0087082	exposure	TRUE	2.14785201070306e-29	inferred	R29r7e	textfile	19	6802571	T	C	455332	0.0115136	1.23629	1.65168	0.454155	0.45318	0.605446	0.454155	1	0.0166795890314944	126.712015319702
551	rs8110061	C	T	0.831229	-0.0225112	0.0025139	exposure	TRUE	3.40685656073201e-19	inferred	R29r7e	textfile	19	2004965	T	C	451791	0.166922	-10.8286	5.82997	0.0632531	-0.318597	0.171528	0.0632531	1	-0.0133212	80.1865072561014
552	rs8128380	C	T	0.63566	-0.0119851	0.00196632	exposure	TRUE	1.09305459238657e-09	inferred	R29r7e	textfile	21	47665693	T	C	456089	0.36419	7.00722	7.54011	0.35272	0.123251	0.132624	0.35272	1	-0.00902497	37.1513783286963
553	rs8178824	C	T	0.969756	-0.0964298	0.00548459	exposure	TRUE	3.38709915059627e-69	inferred	R29r7e	textfile	17	64224775	T	C	455886	0.0298309	-0.39039	2.6743	0.883938	-0.0545858	0.37393	0.883938	1	-0.0260311	309.125048185789
554	rs823071	G	T	0.0527586	0.0234152	0.00414497	exposure	TRUE	1.61323975184264e-08	inferred	R29r7e	textfile	1	205773379	G	T	456161	0.0518118	-2.81997	3.48166	0.417969	-0.232633	0.287219	0.417969	1	0.00836379087697764	31.9119218734767
555	rs850736	G	C	0.62538	0.0399183	0.00193813	exposure	TRUE	2.96251684628385e-94	inferred	R29r7e	textfile	17	42446420	C	G	454912	0.374017	2.16983	7.57148	0.774435	0.0378498	0.132074	0.774435	1	0.030522773545239	424.207426635068
556	rs855791	A	G	0.438789	0.0286941	0.00190693	exposure	TRUE	3.59750700228494e-51	inferred	R29r7e	textfile	22	37462936	A	G	446739	0.437619	6.2471	7.70126	0.417262	0.105331	0.129849	0.417262	1	0.022507220485319	226.420483098896
557	rs866919	C	T	0.352808	-0.0187538	0.00197724	exposure	TRUE	2.42761138709418e-21	inferred	R29r7e	textfile	10	30513283	C	T	447225	0.350702	-9.61806	7.3902	0.193101	-0.176106	0.135314	0.193101	1	-0.0141816	89.9621414563956
558	rs868489	C	T	0.762559	0.0175611	0.00221435	exposure	TRUE	2.18108736811631e-15	inferred	R29r7e	textfile	4	7055253	T	C	449870	0.235452	2.59103	6.62691	0.695807	0.0589998	0.1509	0.695807	1	0.0118231321015472	62.8942436622469
559	rs892090	T	G	0.165534	0.0256786	0.00252514	exposure	TRUE	2.72193931245305e-24	inferred	R29r7e	textfile	19	55539072	T	G	455827	0.165135	-1.83668	5.80601	0.751744	-0.0544851	0.172235	0.751744	1	0.0150604362552126	103.412196217688
560	rs911547	G	A	0.139307	0.0197635	0.0027155	exposure	TRUE	3.38721205582178e-13	inferred	R29r7e	textfile	10	105639421	G	A	453984	0.137891	2.71904	5.36351	0.612189	0.0945185	0.186445	0.612189	1	0.0108011351235247	52.9697717919534
561	rs926326	A	G	0.226921	0.0602072	0.00242342	exposure	TRUE	3.00992231830408e-136	inferred	R29r7e	textfile	6	25575402	A	G	455351	0.227019	-9.87422	6.56537	0.132585	-0.229079	0.152314	0.132585	1	0.0367920009923454	617.219282367872
562	rs928111	A	C	0.742678	-0.0154382	0.00216257	exposure	TRUE	9.41348630659027e-13	inferred	R29r7e	textfile	13	111016886	C	A	450454	0.256198	4.18061	6.7979	0.538565	0.0904669	0.147104	0.538565	1	-0.010636	50.9627644119577
563	rs9294458	G	A	0.384127	0.0113403	0.00191158	exposure	TRUE	2.98497491950044e-09	inferred	R29r7e	textfile	6	90993567	G	A	453991	0.383986	-4.60102	7.61859	0.545897	-0.0792692	0.131258	0.545897	1	0.00880425408967707	35.1936354613136
564	rs9303362	G	A	0.388608	-0.0111509	0.00192732	exposure	TRUE	7.22099450601493e-09	inferred	R29r7e	textfile	17	53062553	G	A	452163	0.387137	12.1575	7.5881	0.109115	0.211144	0.131785	0.109115	1	-0.00860386	33.4743525641536
565	rs9368388	C	A	0.502655	0.0105956	0.00185838	exposure	TRUE	1.18740327842845e-08	inferred	R29r7e	textfile	6	21986376	A	C	456348	0.498074	-4.51078	7.83372	0.564739	-0.0735049	0.127653	0.564739	1	0.00843972780074548	32.5073871446125
566	rs9376060	A	G	0.780005	-0.0295509	0.00224881	exposure	TRUE	1.92480745021111e-39	inferred	R29r7e	textfile	6	135052237	G	A	453475	0.219153	-4.50196	6.47038	0.486567	-0.107533	0.15455	0.486567	1	-0.0195101	172.677557452142
567	rs9392441	T	C	0.652209	0.012753	0.00195298	exposure	TRUE	6.57605631614377e-11	inferred	R29r7e	textfile	6	2885930	C	T	453752	0.347781	-5.63314	7.45946	0.450149	-0.101236	0.134058	0.450149	1	0.00969361661790107	42.6411715014204
568	rs9399136	T	C	0.741798	-0.112476	0.00213269	exposure	TRUE	0	inferred	R29r7e	textfile	6	135402339	C	T	449120	0.256763	8.92245	6.78525	0.188518	0.193799	0.147379	0.188518	1	-0.0784533	2781.40519183112
569	rs9410207	T	C	0.934913	0.0582814	0.00378886	exposure	TRUE	2.15149978966759e-53	inferred	R29r7e	textfile	9	91404799	C	T	454687	0.064209	6.28937	3.8286	0.100438	0.42907	0.261192	0.100438	1	0.0228062106357696	236.615306119979
570	rs9429767	G	A	0.802634	-0.0153706	0.00235569	exposure	TRUE	6.80549513160114e-11	inferred	R29r7e	textfile	1	110496087	A	G	440990	0.192898	1.59746	6.11866	0.794031	0.0426693	0.163434	0.794031	1	-0.00982513	42.5740891103586
571	rs945631	G	A	0.95874	0.041584	0.0047116	exposure	TRUE	1.08605766829016e-18	inferred	R29r7e	textfile	1	93426167	A	G	453358	0.0395758	-4.59157	3.03907	0.130827	-0.497142	0.329048	0.130827	1	0.0131069263140511	77.8960970519978
572	rs9473088	T	A	0.800854	0.0196684	0.00236234	exposure	TRUE	8.37522511963669e-17	inferred	R29r7e	textfile	6	47362492	A	T	440077	0.192769	7.35964	6.09127	0.226959	0.198354	0.164169	0.226959	1	0.0125495767211179	69.3191544812237
573	rs9505851	G	C	0.569329	0.0121232	0.00191118	exposure	TRUE	2.24885779709729e-10	inferred	R29r7e	textfile	6	158006891	C	G	423762	0.426919	-4.09903	7.47011	0.583194	-0.073456	0.133867	0.583194	1	0.0097439507462836	40.2375339232328
574	rs950965	A	G	0.34188	-0.022513	0.00196539	exposure	TRUE	2.22671403613117e-30	inferred	R29r7e	textfile	2	66668309	A	G	451758	0.340639	6.39111	7.40986	0.388405	0.116401	0.134955	0.388405	1	-0.01704	131.210701888667
575	rs9580929	A	G	0.66822	0.0104659	0.00200115	exposure	TRUE	1.69562511290993e-07	inferred	R29r7e	textfile	13	24877151	G	A	454872	0.33162	-9.68836	7.37262	0.188813	-0.17824	0.135637	0.188813	1	0.00775425775504509	27.352301512406
576	rs963997	A	G	0.312551	0.0139978	0.00202474	exposure	TRUE	4.73235106338755e-12	inferred	R29r7e	textfile	5	67203790	A	G	448158	0.310848	-8.24854	7.19236	0.251445	-0.159453	0.139036	0.251445	1	0.0103264906628876	47.7948433663486
577	rs9652296	C	T	0.94365	-0.0233719	0.00408256	exposure	TRUE	1.03546622435079e-08	inferred	R29r7e	textfile	14	74185596	T	C	454861	0.0554081	-3.57517	3.57825	0.317728	-0.279225	0.279466	0.317728	1	-0.00848804	32.7735047470201
578	rs9773950	A	G	0.677575	-0.0143033	0.00201213	exposure	TRUE	1.17279693554365e-12	inferred	R29r7e	textfile	8	71009220	G	A	454510	0.321163	9.94837	7.29538	0.172677	0.18692	0.137073	0.172677	1	-0.0105435	50.5312943673228
579	rs9788889	G	A	0.300308	-0.0174499	0.0020548	exposure	TRUE	2.02653480032094e-17	inferred	R29r7e	textfile	16	9093710	G	A	454055	0.299257	-2.24614	7.15459	0.753564	-0.04388	0.13977	0.753564	1	-0.0126019	72.1185142271131
580	rs9809116	A	G	0.592015	-0.021142	0.00190448	exposure	TRUE	1.23780521126775e-28	inferred	R29r7e	textfile	3	72397279	G	A	442101	0.406153	0.988122	7.57932	0.896273	0.0172009	0.131938	0.896273	1	-0.0166936	123.236485502837
581	rs9828304	G	A	0.548007	-0.0114977	0.001869	exposure	TRUE	7.66121190238418e-10	inferred	R29r7e	textfile	3	138602992	A	G	455216	0.452404	0.230765	7.79328	0.976378	0.00379952	0.128316	0.976378	1	-0.0091175	37.8445497616629
582	rs9829114	G	A	0.583371	0.0184356	0.00189318	exposure	TRUE	2.07801502292675e-22	inferred	R29r7e	textfile	3	196518623	A	G	448353	0.416861	10.8725	7.6727	0.156472	0.184686	0.130332	0.156472	1	0.0145415390997496	94.8267219020481
583	rs9864328	C	T	0.741042	-0.0204061	0.0021251	exposure	TRUE	7.80900329756788e-22	inferred	R29r7e	textfile	3	167398997	T	C	452584	0.2587	-8.46446	6.83776	0.215754	-0.181039	0.146247	0.215754	1	-0.0142721	92.206445076546
584	rs9865178	T	C	0.595212	0.0143884	0.00189395	exposure	TRUE	3.02998094637771e-14	inferred	R29r7e	textfile	3	101175225	C	T	456285	0.404513	-1.1678	7.67811	0.879112	-0.019809	0.13024	0.879112	1	0.0112460337896892	57.7149051857071
585	rs9867473	A	C	0.428512	-0.0108658	0.00188361	exposure	TRUE	7.9930925268165e-09	inferred	R29r7e	textfile	3	195831098	A	C	452068	0.42705	-1.18941	7.70186	0.87727	-0.0200511	0.129839	0.87727	1	-0.00857934	33.2767910036117
586	rs9895429	A	C	0.761581	0.020414	0.00219699	exposure	TRUE	1.51695377466413e-20	inferred	R29r7e	textfile	17	57496970	C	A	456348	0.237476	3.64299	6.66813	0.584841	0.0819312	0.149967	0.584841	1	0.0137534555210998	86.3376175991807
587	rs9896202	T	C	0.502174	-0.00998473	0.00187555	exposure	TRUE	1.01717965934932e-07	inferred	R29r7e	textfile	17	77778227	C	T	452948	0.497911	1.16918	7.80521	0.880926	0.0191917	0.12812	0.880926	1	-0.0079099	28.341012270062
588	rs9904302	A	G	0.623869	-0.0116458	0.00194004	exposure	TRUE	1.93864706190043e-09	inferred	R29r7e	textfile	17	63758238	G	A	448825	0.374824	17.4226	7.53094	0.020697	0.307195	0.13301	0.0209123	1	-0.00895991	36.0343992569827
589	rs9906320	G	A	0.22448	-0.022481	0.00225036	exposure	TRUE	1.68654612816778e-23	inferred	R29r7e	textfile	17	72690829	G	A	453330	0.223273	2.34759	6.51485	0.718589	0.0553113	0.153495	0.718589	1	-0.0148358	99.7992441067783
590	rs9919955	G	C	0.833708	0.0280506	0.00254048	exposure	TRUE	2.41092412723414e-28	inferred	R29r7e	textfile	15	57083831	C	G	451845	0.163681	-0.603826	5.76198	0.916539	-0.0181873	0.173551	0.916539	1	0.016423813853563	121.913766777568
591	rs9937661	T	C	0.53588	0.0193202	0.00191658	exposure	TRUE	6.73411053704529e-24	inferred	R29r7e	textfile	16	5020514	C	T	425427	0.462374	8.93367	7.54295	0.236265	0.157017	0.132574	0.236265	1	0.0154533022952509	101.61769322929
592	rs9947269	T	C	0.869582	-0.0254962	0.00280614	exposure	TRUE	1.02880452546619e-19	inferred	R29r7e	textfile	18	42008393	C	T	453364	0.129139	5.9034	5.23851	0.259775	0.215123	0.190894	0.259775	1	-0.0134929	82.5528831498853
593	rs9950562	C	T	0.46572	0.0145665	0.00188957	exposure	TRUE	1.26910050077129e-14	inferred	R29r7e	textfile	18	43727671	C	T	454882	0.465619	2.32221	7.80987	0.766205	0.0380727	0.128043	0.766205	1	0.0114291896650434	59.4270888418955
594	rs9951002	T	A	0.767321	-0.0157075	0.00225279	exposure	TRUE	3.11434594219636e-12	inferred	R29r7e	textfile	18	73426923	A	T	444520	0.2285	-1.04653	6.48463	0.871789	-0.0248876	0.154211	0.871789	1	-0.0104573	48.6152717209692
595	rs9969783	A	C	0.45405	-0.0268129	0.00188605	exposure	TRUE	7.24548738321716e-46	inferred	R29r7e	textfile	9	4888441	A	C	439553	0.453496	-0.61571	7.67097	0.936027	-0.0104635	0.130362	0.936027	1	-0.0214381	202.106915088054
F-statistic was calculated using the following formulas: F=R^2 (n-2)⁄(1-R^2) and R^2=2×MAF×(1-MAF)×β^2, where F represents F-statistic, R^2 represents the phenotypic variance explained by a genetic instrument, N is the sample size, β is the estimated genetic association of SNP with the exposure, MAF is the minor allele frequency. SNP: single nucleotide polymorphisms.

## Sheet: S4
Tab S4. Characteristics of GWAS-identified Spleen volume-associated genetic instruments.
	SNP	effect_allele.exposure	other_allele.exposure	eaf.exposure	beta.exposure	se.exposure	exposure	mr_keep.exposure	pval.exposure	pval_origin.exposure	id.exposure	data_source.exposure	chromosome	base_pair_location	effect_allele	other_allele	N	effect_allele_frequency	T	SE_T	P_noSPA	beta	standard_error	p_value	CONVERGE	R	F
1	rs111907377	C	T	0.157474	-0.053329	0.00955057	exposure	TRUE	2.35244584340993e-08	inferred	qGJDuV	textfile	22	30225127	C	T	453711	0.157415	-4.92836	5.70696	0.387824	-0.151319	0.175225	0.387824	1	-0.00828954	31.1794389443054
2	rs11224309	G	C	0.096923	0.0926851	0.0116613	exposure	TRUE	1.89404041352652e-15	inferred	qGJDuV	textfile	11	100463238	G	C	455001	0.0973701	-3.55041	4.62506	0.442697	-0.165975	0.216213	0.442697	1	0.0117822324566073	63.1721865612098
3	rs1150779	T	C	0.922185	-0.0891381	0.0129416	exposure	TRUE	5.66941854702719e-12	inferred	qGJDuV	textfile	6	34215919	C	T	455707	0.0778746	4.68195	4.22433	0.267719	0.262369	0.236724	0.267719	1	-0.0102026	47.4406685412815
4	rs11658587	T	C	0.038178	0.104408	0.0180409	exposure	TRUE	7.15291429850356e-09	inferred	qGJDuV	textfile	17	4901982	T	C	456348	0.0369258	0.756495	2.98335	0.799826	0.084996	0.335194	0.799826	1	0.00856667945149955	33.4927767667799
5	rs11676298	G	C	0.191568	-0.0631131	0.00877157	exposure	TRUE	6.2374510953268e-13	inferred	qGJDuV	textfile	2	227291731	G	C	454799	0.191835	-0.807851	6.20355	0.896389	-0.0209918	0.161198	0.896389	1	-0.0106686	51.7707382216158
6	rs118083884	A	G	0.016021	0.206315	0.0305134	exposure	TRUE	1.36612163094113e-11	inferred	qGJDuV	textfile	17	16522922	A	G	446334	0.0108943	-2.65799	1.60895	0.0985335	-1.02676	0.621525	0.0985335	1	0.010120196579371	45.7172821387633
7	rs12034941	G	A	0.257645	0.047156	0.00792276	exposure	TRUE	2.64940042673315e-09	inferred	qGJDuV	textfile	1	204283359	G	A	456271	0.256585	-4.38105	6.86254	0.523212	-0.093027	0.145719	0.523212	1	0.00881116062029316	35.4259020505472
8	rs12376511	C	T	0.162487	0.0921651	0.00938504	exposure	TRUE	9.19532400152579e-23	inferred	qGJDuV	textfile	9	22142756	C	T	454454	0.160973	-6.44224	5.73892	0.261627	-0.195604	0.174249	0.261627	1	0.0145659992912318	96.4407860184915
9	rs12491937	G	A	0.417322	0.0647955	0.00701353	exposure	TRUE	2.49643012477792e-20	inferred	qGJDuV	textfile	3	12268244	G	A	455098	0.419105	3.98177	7.73351	0.606642	0.0665768	0.129307	0.606642	1	0.0136935469607065	85.3525249035255
10	rs12899025	A	G	0.422696	-0.0393989	0.00703092	exposure	TRUE	2.09869645133043e-08	inferred	qGJDuV	textfile	15	39297872	A	G	454600	0.422199	6.04901	7.72857	0.433814	0.101271	0.12939	0.433814	1	-0.00831081	31.4010290391584
11	rs1634791	G	A	0.538757	-0.0583863	0.007089	exposure	TRUE	1.77792185666816e-16	inferred	qGJDuV	textfile	6	31276777	A	G	414055	0.455507	-5.95143	7.45452	0.424659	-0.107098	0.134147	0.424659	1	-0.0127986	67.8347074189495
12	rs169738	G	A	0.600307	0.0387397	0.00704557	exposure	TRUE	3.83148574711394e-08	inferred	qGJDuV	textfile	6	33537546	A	G	450291	0.397824	-15.1366	7.63535	0.0474299	-0.25964	0.13097	0.0474299	1	0.00819369645868845	30.2329299789155
13	rs17011755	G	A	0.225033	0.0490937	0.00837016	exposure	TRUE	4.48256625787993e-09	inferred	qGJDuV	textfile	10	50287572	G	A	448655	0.219759	-0.297725	6.44554	0.963158	-0.00716634	0.155146	0.963158	1	0.00875628859050708	34.4020251599074
14	rs1861270	G	A	0.74875	-0.0475428	0.00797457	exposure	TRUE	2.49472740924604e-09	inferred	qGJDuV	textfile	2	202126615	A	G	453813	0.252926	-0.55378	6.78788	0.934978	-0.012019	0.147321	0.934978	1	-0.00884959	35.5430720598706
15	rs28688110	T	A	0.11018	-0.0719074	0.0110974	exposure	TRUE	9.1928376938368e-11	inferred	qGJDuV	textfile	14	93511785	T	A	455113	0.109466	-7.91122	4.87305	0.10449	-0.333152	0.20521	0.10449	1	-0.00960448	41.9860183744427
16	rs3731211	A	T	0.722937	-0.0624539	0.0077456	exposure	TRUE	7.43559181856463e-16	inferred	qGJDuV	textfile	9	21986847	T	A	456348	0.278283	-7.44948	7.03682	0.289762	-0.150443	0.14211	0.289762	1	-0.0119351	65.0143158022153
17	rs374039502	A	T	0.019797	0.191467	0.0264761	exposure	TRUE	4.77013155371232e-13	inferred	qGJDuV	textfile	13	108960385	A	T	448455	0.0166839	-1.90266	1.94604	0.328217	-0.502412	0.513865	0.328217	1	0.0107983184602388	52.2973688762912
18	rs4444903	G	A	0.406327	0.0533054	0.00705911	exposure	TRUE	4.30961797937448e-14	inferred	qGJDuV	textfile	4	110834110	G	A	456348	0.404552	-8.56604	7.68433	0.264961	-0.145067	0.130135	0.264961	1	0.0111775597864269	57.0220090076893
19	rs4455005	A	G	0.640291	0.0446202	0.00726741	exposure	TRUE	8.26429013184978e-10	inferred	qGJDuV	textfile	17	1958536	G	A	446007	0.357524	3.74461	7.41639	0.613622	0.0680803	0.134836	0.613622	1	0.00919313492127392	37.6967318976706
20	rs4768862	A	G	0.670713	-0.0449997	0.00735329	exposure	TRUE	9.37700019854064e-10	inferred	qGJDuV	textfile	12	51194827	G	A	456088	0.32876	5.12767	7.33124	0.484285	0.0954037	0.136403	0.484285	1	-0.00906122	37.4503472364348
21	rs4896089	T	G	0.19755	-0.0533174	0.00870025	exposure	TRUE	8.88449368085479e-10	inferred	qGJDuV	textfile	6	135053245	T	G	453774	0.196641	-2.41295	6.22164	0.69814	-0.062336	0.160729	0.69814	1	-0.00909705	37.5555789885609
22	rs55968914	G	C	0.224368	0.0486991	0.0083363	exposure	TRUE	5.16359629414146e-09	inferred	qGJDuV	textfile	3	123110581	G	C	449106	0.22266	-13.5493	6.48444	0.0366625	-0.322233	0.154188	0.036629	1	0.00871681117281672	34.126771121535
23	rs56043070	A	G	0.072187	0.0791233	0.0133498	exposure	TRUE	3.08654704076825e-09	inferred	qGJDuV	textfile	1	247719769	A	G	456348	0.0716493	-5.77945	4.06387	0.154981	-0.349951	0.246071	0.154981	1	0.00877335683927735	35.1284724853929
24	rs61750929	T	C	0.055069	0.149132	0.0152285	exposure	TRUE	1.20716542953619e-22	inferred	qGJDuV	textfile	9	91495135	T	C	455072	0.0549902	2.65859	3.56228	0.455476	0.209505	0.280719	0.455476	1	0.0145153948642232	95.9019480602635
25	rs61963226	A	T	0.198627	0.0503466	0.00874613	exposure	TRUE	8.59047010111267e-09	inferred	qGJDuV	textfile	13	41535409	A	T	447573	0.192838	-3.78473	6.13555	0.537331	-0.100538	0.162985	0.537331	1	0.00860413415234958	33.136637571336
26	rs641154	T	C	0.488261	0.0378914	0.006914	exposure	TRUE	4.24395015774642e-08	inferred	qGJDuV	textfile	1	234864214	T	C	451901	0.493565	-5.65983	7.7968	0.467889	-0.0931045	0.128258	0.467889	1	0.00815222494306778	30.0346484580301
27	rs6790106	C	T	0.159651	0.0519371	0.00940842	exposure	TRUE	3.3846251648799e-08	inferred	qGJDuV	textfile	3	159839705	C	T	455693	0.160546	13.3025	5.76652	0.0210636	0.40004	0.173414	0.021063	1	0.00817732490120887	30.4734763076577
28	rs7137828	T	C	0.519333	-0.133338	0.0069008	exposure	TRUE	3.5006195328707e-83	inferred	qGJDuV	textfile	12	111932800	C	T	455254	0.483698	-3.62072	7.83229	0.643879	-0.0590226	0.127677	0.643879	1	-0.0286253	373.343841399935
29	rs7734992	C	T	0.41806	0.0388741	0.00712471	exposure	TRUE	4.86333148086799e-08	inferred	qGJDuV	textfile	5	1280128	C	T	428209	0.416258	-22.1696	7.49193	0.00308505	-0.394976	0.13404	0.00321175	1	0.00833779433067059	29.7705125259329
30	rs857721	A	T	0.267507	-0.0536076	0.00779386	exposure	TRUE	6.0620513298436e-12	inferred	qGJDuV	textfile	1	158612548	A	T	456348	0.266825	8.20887	6.9429	0.23707	0.170295	0.144032	0.23707	1	-0.0101813	47.3094095775997
31	rs9376091	T	C	0.263301	0.0509455	0.00786532	exposure	TRUE	9.34206859899222e-11	inferred	qGJDuV	textfile	6	135419636	T	C	451667	0.258732	8.45601	6.82187	0.215144	0.181702	0.146587	0.215144	1	0.00963742572187419	41.954530438425
F-statistic was calculated using the following formulas: F=R^2 (n-2)⁄(1-R^2) and R^2=2×MAF×(1-MAF)×β^2, where F represents F-statistic, R^2 represents the phenotypic variance explained by a genetic instrument, N is the sample size, β is the estimated genetic association of SNP with the exposure, MAF is the minor allele frequency. SNP: single nucleotide polymorphisms.
